# Supplementary material for: Factors that influence patient preferences for virtual consultations in an orthopaedic rehabilitation setting: a qualitative study
Source: PubMed Central journal article supplement (PMC7908916; doi:10.1136/bmjopen-2020-041038), 2021-02-25
Supplement: bmjopen-2020-041038.draft_revisions.pdf [file bmjopen-2020-041038.draft_revisions.pdf]

# BMJ Open

BMJ Open is committed to open peer review. As part of this commitment we make the peer review history of every article we publish publicly available.

When an article is published we post the peer reviewers' comments and the authors' responses online. We also post the versions of the paper that were used during peer review. These are the versions that the peer review comments apply to.

The versions of the paper that follow are the versions that were submitted during the peer review process. They are not the versions of record or the final published versions. They should not be cited or distributed as the published version of this manuscript.

BMJ Open is an open access journal and the full, final, typeset and author-corrected version of record of the manuscript is available on our site with no access controls, subscription charges or pay-per-view fees (<http://bmjopen.bmj.com>).

If you have any questions on BMJ Open's open peer review process please email [info.bmjopen@bmj.com](mailto:info.bmjopen@bmj.com)

# BMJ Open

## What factors influence patient preference for communication technology consultations in an orthopaedic rehabilitation setting? A qualitative abductive analysis

|                               |                                                                                                                                                                                                                                                                                                                                                                                                                                             |
|-------------------------------|---------------------------------------------------------------------------------------------------------------------------------------------------------------------------------------------------------------------------------------------------------------------------------------------------------------------------------------------------------------------------------------------------------------------------------------------|
| Journal:                      | <i>BMJ Open</i>                                                                                                                                                                                                                                                                                                                                                                                                                             |
| Manuscript ID                 | bmjopen-2020-041038                                                                                                                                                                                                                                                                                                                                                                                                                         |
| Article Type:                 | Original research                                                                                                                                                                                                                                                                                                                                                                                                                           |
| Date Submitted by the Author: | 01-Jun-2020                                                                                                                                                                                                                                                                                                                                                                                                                                 |
| Complete List of Authors:     | Gilbert, Anthony; Royal National Orthopaedic Hospital Stanmore, Therapies Department; University of Southampton, Faculty of Health Sciences<br>Jones, Jeremy; University of Southampton, Faculty of Health Sciences<br>Stokes, Maria; University of Southampton, Faculty of Health Sciences<br>May, Carl; London School of Hygiene and Tropical Medicine Faculty of Epidemiology and Population Health; NIHR Applied Research Collaboration |
| Keywords:                     | QUALITATIVE RESEARCH, ORTHOPAEDIC & TRAUMA SURGERY, HEALTH SERVICES ADMINISTRATION & MANAGEMENT                                                                                                                                                                                                                                                                                                                                             |
|                               |                                                                                                                                                                                                                                                                                                                                                                                                                                             |

SCHOLARONE™  
Manuscripts

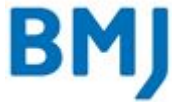

I, the Submitting Author has the right to grant and does grant on behalf of all authors of the Work (as defined in the below author licence), an exclusive licence and/or a non-exclusive licence for contributions from authors who are: i) UK Crown employees; ii) where BMJ has agreed a CC-BY licence shall apply, and/or iii) in accordance with the terms applicable for US Federal Government officers or employees acting as part of their official duties; on a worldwide, perpetual, irrevocable, royalty-free basis to BMJ Publishing Group Ltd ("BMJ") its licensees and where the relevant Journal is co-owned by BMJ to the co-owners of the Journal, to publish the Work in this journal and any other BMJ products and to exploit all rights, as set out in our [licence](#).

The Submitting Author accepts and understands that any supply made under these terms is made by BMJ to the Submitting Author unless you are acting as an employee on behalf of your employer or a postgraduate student of an affiliated institution which is paying any applicable article publishing charge ("APC") for Open Access articles. Where the Submitting Author wishes to make the Work available on an Open Access basis (and intends to pay the relevant APC), the terms of reuse of such Open Access shall be governed by a Creative Commons licence – details of these licences and which [Creative Commons](#) licence will apply to this Work are set out in our licence referred to above.

Other than as permitted in any relevant BMJ Author's Self Archiving Policies, I confirm this Work has not been accepted for publication elsewhere, is not being considered for publication elsewhere and does not duplicate material already published. I confirm all authors consent to publication of this Work and authorise the granting of this licence.

## *BMJ OPEN*

# What factors influence patient preference for communication technology consultations in an orthopaedic rehabilitation setting? A qualitative abductive analysis

## Authors

1. Anthony Gilbert<sup>1,2</sup>
2. Jeremy Jones<sup>2</sup>
3. Maria Stokes<sup>2</sup>
4. Carl R May<sup>3,4</sup>

## Author Affiliations

1. Therapies Department, Royal National Orthopaedic Hospital, Stanmore, UK
2. School of Health Sciences, Faculty of Environmental and Life Sciences, University of Southampton, Southampton, UK
3. Faculty of Public Health and Policy, London School of Hygiene and Tropical Medicine, London, UK
4. NIHR Applied Research Collaboration, North Thames.

Corresponding author: Anthony Gilbert [anthony.gilbert@nhs.net](mailto:anthony.gilbert@nhs.net)

## Abstract

Objectives: To identify characterize and explain factors that influence patient preferences for video consultations in an orthopaedic rehabilitation setting

Design: Qualitative study using semi-structured interviews and abductive analysis informed by Burden of Treatment Theory.

Setting: A physiotherapy and occupational therapy department situated within a tertiary orthopaedic centre in the UK.

Participants: Patients who were receiving orthopaedic rehabilitation for a musculoskeletal problem. Occupational therapists, physiotherapists or therapy technicians involved in the delivery of orthopaedic rehabilitation for patients with a musculoskeletal problem.

Results: Twenty-two patients and Twenty-two healthcare professionals were interviewed. The average interview length was forty-eight minutes. Four major factors were found to influence preference: the current situation, the expectations, the demand and the capacity. These factors combined and competed with each other to influence preference.

Conclusion: A better understanding of influencing mechanisms on patient preferences is needed to support the design of patient centered communication technology pathways. This study has identified key factors that appear to influence patient preference for video-conferenced consultations in orthopaedic rehabilitation. A robust conceptual model of these factors has been developed highlighting how they combine and compete.

## Strengths and limitations of this study

- This is the first qualitative investigation of patient and clinician preferences for video consultation in a tertiary orthopaedic setting.
- Maximum variation sampling and abductive qualitative analysis reveal key factors that shape patient preferences framed within burden of treatment theory.
- Single site qualitative study is not generalizable but mechanistic model is transportable between settings.

## Background

Videoconferencing technologies, such as Skype, Zoom, Attend Anywhere and MS Teams, have been received enthusiastically by healthcare policy makers<sup>1-3</sup> as they provide a medium to improve access to care. These technologies are also viewed as a significant contributor to health and wealth<sup>4</sup> and efficiency gain strategies<sup>5</sup>. Communication technologies such as videoconferencing is being used across many fields of healthcare<sup>6</sup> and can offer advantages to patients. In January 2020, the United Kingdom recorded its first case of Novel Coronavirus (COVID-19). The outbreak of COVID-19 placed the NHS under significant strain. Social distancing measures were introduced in the United Kingdom in March 2020 and Virtual Consultations (VC) (via telephone or video call) were identified as a potential alternative to face-to-face consultations at this time<sup>7,8</sup>. Organisations were forced to rapidly implement VC as a consequence of COVID-19<sup>9</sup>.

Greenhalgh et al<sup>10</sup> conducted a multilevel mixed methods study of Skype consultations and found that they were safe, effective and convenient for patients when healthcare professionals judged them clinically appropriate. However, the authors<sup>10</sup> found that the reality of establishing VC's in outpatient services was more complex than originally anticipated. This complexity is a longstanding problem in the implementation of telemedicine and telecare systems<sup>11</sup>.

### Patient preferences and burden of treatment

A preference is defined as an individualised 'total subjective comparative evaluation'<sup>12</sup>. Put simply, an individual weighs up the state of affairs of the alternatives. Preference theory suggests that a person will prefer the outcome that yields increased utility, and therefore that patients would prefer a VC if they believe its benefits outweigh its burdens<sup>12</sup>. To date, patient preferences for telemedicine have only been investigated at a general population level<sup>13</sup>.

VC's have been shown to change what is required of patients<sup>14 15 16</sup>. A workload for patients that exceeds their capacity has been demonstrated to be a driver of treatment burden for those with lung cancer and chronic obstructive pulmonary disease<sup>17</sup>. Treatment burden in stroke patients has been shown to be influenced by the quality and configurations of healthcare<sup>18</sup>. What is not yet understood is how changes in the work and demands of being a patient as a result of VC influence preference for VC in a healthcare setting.

Patients' and professionals' preferences for telemedicine are not isolated from their other experiences of healthcare, or from the ways that they experience other aspects of their lives. If we are interested in the ways that patients understand and calculate the relationship between benefits and burdens, then we should also include burdens in our investigation. Shippee et al's<sup>19</sup> cumulative complexity model assumes an arithmetical relationship between delegated health system workload and individual patient capacity, and suggests that this explains healthcare utilization. However, health behaviours and service utilization take place in a broader social context, and Burden of treatment theory (BoT)<sup>20</sup> provides a way into this problem. BoT explains the relationship between the demands that participating in healthcare places on patients and caregivers (their workload), and the affective, cognitive, relational and material resources that they can bring to bear on this workload (their capacity).<sup>21 22</sup>

To our knowledge, no studies have yet investigated the relationship between patient preferences around telemedicine services and their experience of burden of treatment. We need to better understand this to support the development of care pathways that take into account what offers patients increased utility. This paper therefore aims to identify, characterise, and explain factors that influence patient preferences for VCs in an orthopaedic rehabilitation setting.

## Methods

This research forms phase II of the CONNECT Project. The protocol for the CONNECT Project has been published elsewhere<sup>23</sup>.

### Setting

The research was conducted within a single specialist orthopaedic hospital in North London, UK. All participants were recruited from the Occupational Therapy and Physiotherapy Department.

### Participants

A maximum variation sample were recruited. These included 22 patients and 22 healthcare professionals (see table 1 for the inclusion and exclusion criteria). We aimed to recruit as least 10 male and 10 female patients (10 <50 years, 10 >50 years) and 20 healthcare professionals (occupational therapists and physiotherapists). The first two patients and healthcare professionals were used to pilot the interview schedule (See Supplementary Material).

### Recruitment

The study was advertised using a pop-up banner in the Occupational Therapy and Physiotherapy Departments. Patients were encouraged to discuss the study with their treating healthcare professional or could approach the researcher directly via email. Healthcare professionals were sent a departmental wide email informing them of the study both from the perspective of discussing with patients as well as enrolling as a participant. Suitable and interested potential participants were provided with a participant information sheet and given at least 24 hours to discuss the study with the researcher. They were enrolled in the study upon receipt of informed written consent.

### Data Collection

Design of the interview schedules were formed by Burden of Treatment Theory<sup>24</sup> (see supplementary material) and the results of Phase I of the CONNECT Project<sup>14</sup>. Interviews were conducted on site at the hospital or virtually using phone or SKYPE. Interviews were to last around 60 minutes with the option to extend or shorten as required. All interviews were audio recorded and sent off for transcription to an external company. All transcripts were emailed or posted to participants upon receipt to give them the option to verify the data or to make any adjustments.

### Data Analysis

Interview transcripts were reviewed and uploaded into NVIVO. Open coding techniques were used to identify empirical regularities (themes) in the data. Then, those themes were interrogated for attributions about patient preferences and the factors that shape them. Inferences were made about the ways that preferences worked, the relative position and significance of the factors that

shaped them, forming abductive explanation. Finally, themes arising from the data were mapped out in a model to visualise how different factors might influence preference for communication technology. Reporting was conducted using the Standards for Reporting Qualitative Research<sup>25</sup> (See supplementary material).

**Table 1 – Inclusion and exclusion criteria**

| Inclusion criteria                                                                                                                                                                                                                                                                                                                                                                                                                                                                                                                                                                         | Exclusion criteria                                                                                                                                                                                                                                                                                                                                                                                       |
|--------------------------------------------------------------------------------------------------------------------------------------------------------------------------------------------------------------------------------------------------------------------------------------------------------------------------------------------------------------------------------------------------------------------------------------------------------------------------------------------------------------------------------------------------------------------------------------------|----------------------------------------------------------------------------------------------------------------------------------------------------------------------------------------------------------------------------------------------------------------------------------------------------------------------------------------------------------------------------------------------------------|
| <ul style="list-style-type: none"> <li>• Patients, over the age of 18 years, attending the RNOH for Physiotherapy or Occupational Therapy</li> <li>• Patients who have experience of orthopaedic / musculoskeletal condition</li> <li>• Patients who are able to provide informed written consent to enter into the study</li> <li>• Patients able to understand and speak English or a language covered by the RNOH Interpreter service</li> <li>• Physiotherapists or Occupational Therapists (or assistants) who treat patients with orthopaedic / musculoskeletal disorders</li> </ul> | <ul style="list-style-type: none"> <li>• Patients without the capacity to consent</li> <li>• Patients suffering from disorders other than orthopaedic as the primary cause (eg neurological or oncology disorders)</li> <li>• Physiotherapists or Occupational Therapists who do not currently treat, or have no experience of treating patients with orthopaedic / musculoskeletal disorders</li> </ul> |

## Results

Forty-four participants were interviewed in the study; 22 patients (12 female, average age 46 [range 20-78]) and 22 healthcare professionals (13 physiotherapists, 14 female, average age 35 [range 23-52]) were included in the study. The average interview length was 48 minutes [range 28 – 81 minutes]. Two patient interviews were conducted over the phone and two over Skype. Two healthcare professional interviews were conducted over the phone.

### Interpretation of results

The resulting data can be seen in Table 2a-2d.

#### Theme 1: Situation

The situation represents the ways that patients understand and explain their clinical status, their treatment requirements, and the care pathway.

##### *(i) Clinical status*

Patient preferences varied based on the clinical challenge's patients faced at that time and the patient's capacity to meet the demands the clinical status required. Healthcare professionals had



1  
2  
3 an awareness of the volatile nature of patient's clinical status. Patients who had a long term  
4 orthopaedic condition had an awareness that their clinical status has the potential to both worsen  
5 and improve with some patients experiencing this degree of volatility. The patients' orthopaedic  
6 problem could stand alone or was in conjunction with other physical or mental health issues.  
7  
8

9 (ii) *Treatment requirements*

10  
11 The requirements of treatment are dependent on the clinical status of the patient, in accordance  
12 with the normal management for that status. A spectrum of management strategies may be  
13 required, some of which traditionally require hands-on treatment and others which can be  
14 delivered without physical contact. Some clinical status' require forced restriction of activities  
15 which make physical attendance challenging, whereas other status' require physical contact.  
16  
17

18 (iii) *Care pathway*

19  
20 Patient preferences are influenced by the care that is available. Some patients who found  
21 accessing care challenging would feel less inclined to travel if the session was very short at an  
22 inconvenient time of day. Others would be prepared to travel, whatever the offering. Regular  
23 repeated appointments can be burdensome for patients, particularly those with other  
24 commitments that might use up capacity. Patients with infrequent appointments appeared to  
25 favour face-to-face (F2F) appointments, although there were exceptions to this. Healthcare  
26 professionals commented on the rigidity of corporate resources, with some finding the volume of  
27 workload reduced their capacity to be flexible, for instance finding time to support patients with  
28 managing their VC.  
29  
30  
31  
32

33 The *Situation* is a factor that influences preference. Each situation is unique to the individual  
34 based on their clinical status, treatment requirements and the availability of care. The situation is  
35 influenced by the *Capacity* of the patient which in turn influences the *Demands* and the  
36 *Expectations* of patients. Whilst certain factors influence preferences for a patient in one  
37 direction, other factors may have an opposite effect.  
38  
39  
40  
41  
42  
43  
44  
45  
46  
47  
48  
49  
50  
51  
52  
53  
54  
55  
56  
57  
58  
59  
60

Table 2a – Theme 1: Situation

| Factor                 | Description                                                                                                                                        | Patients Accounts                                                                                                                                                                                                                                                                                                                                                                                                                                                                                                                                                                                                                                          | Healthcare Professionals Accounts                                                                                                                                                                                                                                                                                                                                                                                                                                                                                                                                                                                                                                                                              |
|------------------------|----------------------------------------------------------------------------------------------------------------------------------------------------|------------------------------------------------------------------------------------------------------------------------------------------------------------------------------------------------------------------------------------------------------------------------------------------------------------------------------------------------------------------------------------------------------------------------------------------------------------------------------------------------------------------------------------------------------------------------------------------------------------------------------------------------------------|----------------------------------------------------------------------------------------------------------------------------------------------------------------------------------------------------------------------------------------------------------------------------------------------------------------------------------------------------------------------------------------------------------------------------------------------------------------------------------------------------------------------------------------------------------------------------------------------------------------------------------------------------------------------------------------------------------------|
| Clinical status        | The healthcare complaint the patient experiences, its stability, reversibility and its impact on the patient in conjunction with other complaints. | <p><i>If I'm having a flare-up, sometimes I can't even leave the house. I get stuck indoors and I just wouldn't be able to do much really [P7]</i></p> <p><i>It was really annoying because it had, like, dislocated, it was dislocated loads before and after to the point that it was really affecting my life. Then I got banned from doing stairs, I couldn't go out here, I couldn't go out there, couldn't really walk anywhere [P5]</i></p>                                                                                                                                                                                                         | <p><i>You go back, and then sometimes they make an x amount of improvement, or they have a flare up and then it goes back a bit because they get really stressed out. They're back to that fearful of movement [C7]</i></p> <p><i>They're not managing those flare-ups particularly well, so they end up missing classes and things like that. It's become a bit of a spiral to have that - the physical is having a knock on the mental which is having a knock-on effect on the physical and they're just spiralling out of control [C14]</i></p>                                                                                                                                                            |
| Treatment requirements | The treatment and management of the complaint that is required. The restrictions imposed on the patient.                                           | <p><i>But after surgery, I was literally bedbound for three months, so for three months I couldn't do anything [P20]</i></p> <p><i>We're just building up my stamina I think at the moment. Not with the hands but with the shoulders. We're just starting slow, building up [P3]</i></p> <p><i>So, they've basically come up with a programme for my gym telling me how often I should do it, giving me encouragement saying you're a bit better [P6]</i></p>                                                                                                                                                                                             | <p><i>... building arm strength, stability, muscle patterning, working whole kinetic chain, core stability, lots and lots of gluteal rehab, putting a big emphasis on to their understanding of what's a good muscle ache and what they should be feeling and what's working to fatigue rather than what's working into their pain, and then understanding what's an okay pain to have, what's okay to work through, what's not okay to work through [C11]</i></p>                                                                                                                                                                                                                                             |
| Care Pathway           | The availability of healthcare to the patient                                                                                                      | <p><i>On a Skype, are you going to have a half an hour appointment? Or are you just - is it just a check up to see that you're doing the exercises correctly and they say, right, okay, fine carry on with those? Or that looks really good. So, I think it depends on the time apart, how far you are from the hospital [P2]</i></p> <p><i>So if it was once every three months, I'd definitely prefer to have - and so, maybe the later stages and everything's better, then I wouldn't mind having the Skype session, but in terms of the actual rehab and getting from surgery back to performance, I'd definitely like to see a physio. [P20]</i></p> | <p><i>...face-to-face slots for me particularly can be - would be really normal to have to wait six to eight weeks for another appointment just because of our system and the vast amount of patients that we have [C15]</i></p> <p><i>I think doing it as an adjunct where it's extra, we just don't have the capacity for a start, even if it was to [text doing], doing things like that. I think that would be difficult to fit in [C1]</i></p> <p><i>At the moment our face-to-faces are an hour. We don't know that when we do virtual it could be actually much more efficient for us. We could do a really good 30-minute telephone consultation and we can actually fit more of them in [C18]</i></p> |

## Theme 2: Expectations

Patients have expectations for both VC and F2F consultations. These expectations are influenced by a patients desire for contact, psychological status, previous care and perceived requirements.

### (i) *Desire for contact*

Patients had beliefs about the effectiveness of a VC's in comparison to a F2F therapy session. They preferred F2F consultations if they believed they would have more favorable outcomes as a result. Patients also preferred F2F contact if they felt their condition was complicated and warranted a physical examination. Healthcare professionals believed that VC's were not capable of delivering the physical aspect of a session.

### (ii) *Psychological status*

Patient motivation and self-efficacy was an important consideration for both patients and healthcare professionals. Some patients felt they were less likely to complete prescribed care if they were attending virtually whereas others felt that VC's could reduce the anxieties associated with F2F interactions and travelling into the hospital. Healthcare professionals had an awareness of the potential limitations of VC's to offer empathy to the patients who desired it.

### (iii) *Previous care*

Patients previous experience influenced their preference for VC. Patients who had built up a good rapport with their current care team felt that they want F2F to continue whereas others felt that, as they trusted their healthcare professionals, they would be willing to try a new innovation. Patients who had received sub-optimal care elsewhere felt that they would be more likely to stick to the status quo if this worked well for them. Healthcare professionals were sensitive to the varied experiences and expectation of patients.

### (iv) *Perceived requirements*

Patients who feel the need for hands on F2F care reported a preference towards F2F care. Patients who did not feel this was necessary did not feel the same sway towards this. Care requirements differed based on the individual circumstances of the patient and the length of time of the appointment. Patients who travelled less frequently preferred to receive a physical examination, often as a 'checkup' to assess the physical status of the problem.

Table 2b – Theme 2: Expectations

| Factor                 | Description                                                                                                          | Patients Accounts                                                                                                                                                                                                                                                                                                                                                                                                                                                                                                                     | Healthcare Professionals Accounts                                                                                                                                                                                                                                                                                                                                                                                                                                                                                                                                                              |
|------------------------|----------------------------------------------------------------------------------------------------------------------|---------------------------------------------------------------------------------------------------------------------------------------------------------------------------------------------------------------------------------------------------------------------------------------------------------------------------------------------------------------------------------------------------------------------------------------------------------------------------------------------------------------------------------------|------------------------------------------------------------------------------------------------------------------------------------------------------------------------------------------------------------------------------------------------------------------------------------------------------------------------------------------------------------------------------------------------------------------------------------------------------------------------------------------------------------------------------------------------------------------------------------------------|
| Desire for contact     | Whether the patient / healthcare professional believes the F2F is more of a capable method of care delivery than FF. | <p><i>I'm sure I could do that at home on my own but personally I would feel comfortable knowing I've got a person actually feeling it. [P16]</i></p> <p><i>If it's something simple then, yes, that's a good idea. If it's something a bit more complicated they actually have to come and see it because it's more of a hands-on type of thing [P8]</i></p>                                                                                                                                                                         | <p><i>we definitely can't do is gait re-education or gait analysis. We could probably demonstrate exercises ourselves, but actually if we're looking at a movement habit in terms of, say, how someone's shoulder moves, or you need to really see or perhaps feel what that is, I think that's obviously not able to do that [C15]</i></p> <p><i>Obviously, if it was a more physical session, if it was a practical session, that's not going to work particularly well; it's not going to work very well on Skype [C12]</i></p>                                                             |
| Psychological status   | The psychological status of the patient and the impact of this on care across different delivery formats.            | <p><i>One of the reasons why the screens would be good is I would feel less anxious to talk to someone through a screen, but I would in the same room [P9]</i></p> <p><i>You don't like the way that your life's going to look because you know you're not going to be able to achieve all the things that you want to achieve [P17]</i></p> <p><i>Over the years I have done a lot of leg and knee exercises... especially immediately after surgery... I probably should keep them going but I have to say I haven't. [PP2]</i></p> | <p><i>It might also make them feel a bit less anxious about having to travel, having to worry if my therapist or whoever I'm coming to see makes me feel welcome or makes me feel comfortable... It might make them feel a bit more comfortable if they're in their own environment [C16]</i></p> <p><i>I think it's that how much do the patients value that just talking to someone in person, that relationship side of things and those sorts of things that maybe they might not feel so safe to do ... and also sometimes patients just want a hug [C1]</i></p>                          |
| Previous care          | Experience of previous care                                                                                          | <p><i>Yeah, I think you, for me, I feel like I've been able to build up more of a bond with them all because I've seen them in person, whereas if it had been over a screen or a phone, I don't think I would have had that [P5]</i></p> <p><i>So, I've had physio on and off for fibromyalgia and actually I've been able to connect with this much better because of the way it's delivered [P3]</i></p>                                                                                                                            | <p><i>I don't think you can give a one size fits all to people. Some men particularly they just want a number, they want a number, they want sets they want reps. They just want a very clear structure and some people just you have to go that way because they react better to it. They're more likely to be more adherent to exercise if they go that way. Other people it's just a case of listening to your body, see how you feel, see what you manage. Because if you push them too far or push too little you could - you're just going to end up failing them, I think [C14]</i></p> |
| Perceived requirements | The negotiated requirements of the session                                                                           | <p><i>We tend to come down to RNOH probably once every six months now just for a check-in... so that she can then check up on those joints and make sure that I don't need to change what I'm doing or we don't need to look into it and get things investigated with orthopaedics [P17]</i></p>                                                                                                                                                                                                                                      | <p><i>I think it also depends on the population. Not everyone has complex needs as well. I think if we have a routine primary knee replacement there's no reason why you can't get everything. If you have a flare referral you'd be fine to do a 30 minute, whereas if you have a revision who's had five surgeries, 30 minutes is probably not going to be enough, because there will be a lot of belief systems around that which probably need to be looked into. So, yes and no. It depends on what the patient group is [C7]</i></p>                                                     |

### Theme 3: Demand

Patients may face multiple and differing demands dependent on the choices they make regarding a VC or a F2F consultation. Demands include the care factors, social factors and the consequences of choice.

#### *(i) Care factors*

The requirements of care are dependent on the clinical status of the patient. Patients may be required to complete complex exercise regimens or perform assessments. Some of these initiatives may benefit from optimal visualisation of movements. Some of these may require hands on facilitation. For others, manual therapy may be indicated. Preferences are likely to be mediated by what the healthcare professional believes and the consequence of choice will change the demands on patients. These changes may be burdensome depending on the patient's capacity.

#### *(ii) Social factors*

Some patients in this study reported a vast array of social demands that interfered with healthcare, such as caring for elderly relatives or young children. Often, these conflicting demands interfered with the patient's ability to attend their own appointments and rehabilitation. Patients who reported excessive social requirements reported that in some circumstances VC's could be more favorable.

#### *(iii) Consequence of choice*

The use of equipment requires a set of skills that was not familiar to some patients in this study, including rehabilitation equipment and technology for VC. Patients who did not have the space and rehabilitation equipment available preferred to travel in for a F2F consultation. Patients that found the idea of interacting with their rehabilitation professional over a screen challenging where more likely to prefer F2F appointments whereas others did not see this as an issue. Overcoming the lack of physical contact and adapting assessments proved to be an issue for some. The lack of a suitable rehab environment was a concern to some healthcare professionals.

The demands faced by patients arose as a direct result of the situation in conjunction with the capacity to fulfil the demands. Patients who felt that VC's were less burdensome may have a preference towards VC's whereas those who find them more burdensome may have a preference towards F2F consultations.

Table 2c – Theme 3: Demand

| Factor                 | Description                                                               | Patients Accounts                                                                                                                                                                                                                                                                                                                                                                                                                                                                                                                                                                                                                                                                                                                                                                                                                                                                                                    | Healthcare Professionals Accounts                                                                                                                                                                                                                                                                                                                                                                                                                                                                                                                                                                                                                                                                                                                                                                                                                                                                  |
|------------------------|---------------------------------------------------------------------------|----------------------------------------------------------------------------------------------------------------------------------------------------------------------------------------------------------------------------------------------------------------------------------------------------------------------------------------------------------------------------------------------------------------------------------------------------------------------------------------------------------------------------------------------------------------------------------------------------------------------------------------------------------------------------------------------------------------------------------------------------------------------------------------------------------------------------------------------------------------------------------------------------------------------|----------------------------------------------------------------------------------------------------------------------------------------------------------------------------------------------------------------------------------------------------------------------------------------------------------------------------------------------------------------------------------------------------------------------------------------------------------------------------------------------------------------------------------------------------------------------------------------------------------------------------------------------------------------------------------------------------------------------------------------------------------------------------------------------------------------------------------------------------------------------------------------------------|
| Care factors           | The requirements of care                                                  | <p><i>It depends what you're asking them to - if it was - it depends. If it's something simple then, yes, that's a good idea. If it's something a bit more complicated they actually have to come and see it because it's more of a hands-on type of thing [P8]</i></p> <p><i>I suppose it's not so much the conversations but the physical things that you might have to do. It would be very difficult for them to work out - if you're talking physiotherapy - just how your joints were working. They couldn't really see what your back was doing or how your arm was working or whatever, and you can't - they need to feel. Physiotherapy's quite a hands on the body sort of thing [P4]</i></p> <p><i>It's ridiculous in the sense that appointments have almost become a full-time job for me. I'm really grateful, I've got a lovely team of people that know me very well and look after me [P10]</i></p> | <p><i>How many exercises can they realistically fit in their day? I'd rather they did one or two really well than five or six badly [C11]</i></p> <p><i>I guess if they've had no restrictions really at all, then to completely have those restrictions - and it can be quite debilitating because they're so used to being independent and not having to really rely on others [C4]</i></p> <p><i>we do often use our hands for some assessment in terms of feeling for muscle-activated patterns or guarding [C15]</i></p> <p><i>We do lay on our hands. It might well be around showing someone that they've become really hypersensitive. Touching them on an area of skin that is not at all uncomfortable and saying what does that feel like, does it feel like I'm poking, whatever, and then putting your hand on their back or something and then say how does that feel? [C10]</i></p> |
| Social Factors         | The competing life demands that can interfere with healthcare.            | <p><i>I think, because I'm not looking after my mum, my mum has gone into a care home now. At the moment I haven't a job. I'm not working. I'm at home, I'm just doing things at home. I still go to the care home and sort things out for mum and appointments and that [P2]</i></p>                                                                                                                                                                                                                                                                                                                                                                                                                                                                                                                                                                                                                                | <p><i>I think for some people things are muddling along and I probably should work on my routine, but I've got my kids, I've got my work - this takes priority and that's I think my role is trying to tease that out a bit more. So, what is your priority right now? [C12]</i></p> <p><i>Maybe this is where the overwhelmingness comes in because if you are not doing any of things you suddenly feel like you have to change your entire life to be able to manage if some of what we have said isn't said carefully [PC1]</i></p>                                                                                                                                                                                                                                                                                                                                                            |
| Consequences of choice | The things patients need to do as a direct consequence of the choice made | <p><i>For me, it's the equipment. I only live in a small - and it is small, isn't it - a small two-bedroom house. I would have nowhere to store the equipment... there's no option out there to rent equipment [P19]</i></p> <p><i>Some of the stuff he doesn't need to touch me for, like when he's watching me do a squat. Are my knees going the right way? Yeah. He can do that over a FaceTime. That's absolutely fine. But as you say, he needs to - if he wants to check my strength physically, then yeah, I need to be here. It only limits that [P14]</i></p>                                                                                                                                                                                                                                                                                                                                              | <p><i>You might subconsciously use that [travel time] in a beneficial way... If you are straight in on a computer screen maybe there is some prep time that is not build in to the process as easily and you have to be mindful of preparing yourself beforehand [PC1]</i></p> <p><i>If you think about the patient that is actually sent into a flare-up from the journey that they've made... [C8]</i></p> <p><i>So often if they want to try and demonstrate exercises, a common feedback is the fact that their bed's too hard or too soft and it doesn't work, and the plinths are easier to do it [C1]</i></p>                                                                                                                                                                                                                                                                               |

#### Theme 4: Capacity

*Capacity* is the patient's ability to allocate resources to care. These resources are financial, infrastructural, social and healthcare related.

(i) *Financial*

Patients found that the demands of travel to a physical appointment can be costly, particularly when this entailed long journeys by public transport. Some patients were required to take unpaid leave from employment or risk losing their job. Some patients had supportive employers or did not feel significantly impacted through the cost of attendance. Healthcare professionals were aware of these to these financial challenges faces by patients.

(ii) *Infrastructure*

Patients needed to have access to the hardware and software in order to use VC as a form of consultation. There was a requirement to understand how to use the technology in order to undergo a successful VC. There was variation in the types of technology utilized and it was not overtly obvious that one particular type influenced preference although some devices with larger screens were thought to be more beneficial and influence *expectations*. In addition, patients needed to have access to a suitable environment and equipment in order to undergo virtual rehabilitation.

(iii) *Social*

Patients who had a support network available to them found this was a useful resource. Family members were able to assist with the logistics of travel to appointments, activities routines at home and motivation to engage with rehabilitation programmes. Healthcare professionals reported ways in which patients could enhance capacity through their social networks.

(iv) *Healthcare system*

The situation that the patient is orientated to can provide capacity. For example, some patients received hospital funded transport making attendance at the hospital easier. Healthcare professionals are skilled at facilitating motivation and behavior change which could improve capacity. Expectations of success may provide patients with additional motivation and self-efficacy to achieve the demands required of them.

Capacity is an important mediator of preference as it dictates whether or not a patient has the available resources to meet the demands of the situation and the expectations. Capacity is a mediator between the types of influences at work and has a direct influence on preference (See Figure 1).

Table 2d – Theme 4: Capacity

| Factor            | Description                                    | Patients Accounts                                                                                                                                                                                                                                                                                                                                                                                                                                                                                                                                                                                                                                                                                                                  | Healthcare Professionals Accounts                                                                                                                                                                                                                                                                                                                                                                                                                                                                                                                                                                                                                                                                             |
|-------------------|------------------------------------------------|------------------------------------------------------------------------------------------------------------------------------------------------------------------------------------------------------------------------------------------------------------------------------------------------------------------------------------------------------------------------------------------------------------------------------------------------------------------------------------------------------------------------------------------------------------------------------------------------------------------------------------------------------------------------------------------------------------------------------------|---------------------------------------------------------------------------------------------------------------------------------------------------------------------------------------------------------------------------------------------------------------------------------------------------------------------------------------------------------------------------------------------------------------------------------------------------------------------------------------------------------------------------------------------------------------------------------------------------------------------------------------------------------------------------------------------------------------|
| Financial         | The ability to free up financial resources     | <p><i>So obviously taking an afternoon off as annual leave or whatever wouldn't result in a disciplinary, but then in the long-run I have to think... [P5]</i></p> <p><i>If you're doing it once a week or something, you're spacing it out... it's travelling there. That would be - it's expensive to travel up here because it's not exactly in the closest of areas, it's in the middle of nowhere [P7]</i></p>                                                                                                                                                                                                                                                                                                                | <p><i>They might have a bit more support but again they've then got to think about to do - if they're paying for it privately there's the added cost to them [C4]</i></p> <p><i>When I think about some of these patients that come like three hours on public transport - what a waste of money that is. I think of patients that come all the way from Birmingham and Brighton. That doesn't make any sense to me, and actually at times I have said I think we should do this on the phone [C17]</i></p>                                                                                                                                                                                                   |
| Infrastructure    | Access to material and informational resources | <p><i>You could get a stand and you'd be able to see everything really. If you put it on a table, if you need to sit on a chair. You could pull it a bit away from you so they can see you. I reckon definitely it would work [P7]</i></p> <p><i>I would either Skype on my laptop or Skype on my thing, and if I could transfer to the TV, you know? I've got a smart TV, it could be done that way. Because if you've got a bigger picture you could see more, you could do more, whereas if you've got a little screen your vision is very limited to a little square [P8]</i></p>                                                                                                                                              | <p><i>If you haven't got a laptop and Skype at home, then you're probably not going to be that techy, that tech savvy, and that open to learning how to use a tablet that you've never used before or something, probably [C19]</i></p> <p><i>They would need access to the technology... do they have the internet, do they have a connection, do they have a smart device, do they have a way that they can use that and are they familiar with their platform... a prime example is SKYPE. iPhone users tend to use Facetime so do they have a SKYPE account, are they able to set it up? I think it's that accessibility, and it's have they used it before which is a big thing... [PC2]</i></p>         |
| Social            | Support available through social network       | <p><i>I have a husband who does lots of stuff for me... I can't do housework because I can't lift an iron anymore [P4]</i></p> <p><i>Without that group, I think I would just be in bits right now to be honest. [P14]</i></p>                                                                                                                                                                                                                                                                                                                                                                                                                                                                                                     | <p><i>This lady, who I was talking about just before, she lived by herself and she hasn't got any carers but the family was helping [C2]</i></p> <p><i>More patients are having their family members helping them with these things at home and that visit regularly. There's no reason why that can't be - if they're turning up to help them put on TED stockings, then I'm sure they can help them turn on a tablet and watch something [C5]</i></p>                                                                                                                                                                                                                                                       |
| Healthcare system | Sources of healthcare capacity                 | <p><i>I think it's emotional support as well. I suppose in my case because I've had so many mental issues attached to my disorder, I have found support here from an orthopaedic point of view. When I had a setback and I was told there was a potential another infection in my bone I went to pieces here, and I saw [anonymised]. He was so reassuring... I know I've got security because I feel [anonymised] knows my case so well, and he knows what happened [P10]</i></p> <p><i>it's difficult for me, I can't use the underground or anything like that so I use the patient transport and they fetch me... some of those appointments have been 10 minutes or so and I have used the patient transport... [PP2]</i></p> | <p><i>But the skill then is to watch your language and rather than tell someone how easy it is, or tell someone the solution, again that's where motivational interviewing comes in. Rather than saying but you can just pace, let's work out how you can pace, say something like is there anything that you've been learning that you feel could give some boundaries there or anything you've tried? So again, you're getting the person to solve their own problems [C13]</i></p> <p><i>Sometimes the hospital transports are not quite helpful for them. They don't come on time, so they delay sometimes. She ends up missing her appointment because of a delay in the hospital transport [C2]</i></p> |



## Discussion

### Summary of Results

This paper outlines four key factors and describes mechanisms that influence patient preferences in the context of VC for orthopaedic rehabilitation. These factors, empirically derived the study, were constructed from an abductive analysis and can be mapped as an explanatory model that demonstrates the interplay between factors and how they interact to influence preferences.

Figure 1: interactions between mechanisms that influence preference for videoconferencing consultations

#### (a) The relationship between *Situation* and *Expectations*

The situation informs the patient's expectations of care. If the situation demands a particular consultation format the patient will be required to cognitively appraise the suitability of F2F or VC and its alternative. The patient's expectations will in turn inform the situation. The capacity and available resources of a patient may influence their expectations of care. This in turn influences the situation.

#### (b) The relationship between *Situation* and *Demand*

The situation that arises requires the patient to perform specific tasks to engage in their rehabilitation. The patient's ability to perform these tasks is dependent on their capacity. The demands on the patient depends on the situation. These demands will fluctuate as the clinical status and the treatment requirements fluctuate. The availability of the care pathway may remain fixed or fluid dependent on the specific situation. Resources available through capacity will dictate the demands of the situation. Competing demands on the patient may reduce available capacity to complete the demands of care dictated by the situation. The demands on the patient, and their interaction with the patient's capacity in turn influences the situation. These factors may combine or compete with each other and the situation is therefore dynamic.

#### (c) The relationship between *Situation* and *Capacity*

Patient capacity influences patient expectations directly via the demands and expectations of care. The situation influences preferences indirectly via these mechanisms. In addition; the capacity of the patient to engage with care itself can influence the situation as resources may be allocated to the patient by the healthcare provider depending on a need's basis, for example, whether a patient qualifies for hospital funded transport. The situation is firmly established only if an equilibrium is reached between the situation and capacity. Examples of additional capacity may include initiatives such as hospital funded transport and interpreters. The capacity of the patient to engage with care is therefore directly dependent on the situation.

#### (d) The consequences of *Preference*

1  
2  
3 The preferred choice between a F2F and a VC has consequences. The consequences of choice  
4 directly impact on the demands of the patient and their expectations of care. Changes in  
5 expectations and demand in turn influence the patient's capacity and the situation.  
6  
7

#### 8 (e) The formation of *Preference*

9  
10 The formation of preference, within this study, was the resulting process of complex factors  
11 interacting with one another. The establishment of the situation and capacity dictate the  
12 expectations and demands of care. Preferences are established following the cognitive task of  
13 weighing up the state of affairs of the alternatives.  
14

#### 15 Results in context

16  
17 Burden of treatment theory<sup>24</sup> and the cumulative complexity model<sup>19</sup> both focus on the  
18 relationship between the workload demands on the patient with the patients capacity to do the  
19 work. Our previous research<sup>14</sup> hypothesized that the work of being a patient influences  
20 preference; patients may prefer the least burdensome option when giving the choice between a  
21 F2F and VC.  
22  
23

24  
25 This current paper refines our previous model of patient preferences adding in: the patient's  
26 expectations of care (see Figure 1). For some patients the physical attendance at a clinic was  
27 burdensome, yet they preferred to attend due for a particular experience of care; for example to  
28 receive hands on manipulation. Some patients were prepared to tolerate burden as part of a  
29 process that offered them F2F care they believed was superior to a VC. In addition, some patients  
30 perceived the consequences of choosing a F2F (or VC) would significantly impact on their overall  
31 experience of care, both positive or negative. The model within this paper clearly demonstrates  
32 additional factors relating to BoT are likely to influence their preference. The option that best  
33 meets patients' expectations of care influences preferences.  
34  
35

36  
37 Some patients discussed the situational nature of their problem and how their preferences may  
38 have been different under different circumstances. This is in accord with our qualitative study of  
39 acceptability for rehabilitation consultations<sup>15</sup>. Greenhalgh et al<sup>10</sup> found that videoconferencing  
40 using SKYPE was useful to access hard to reach patients and that avoiding long journeys to access  
41 care was beneficial. Not travelling can reduce healthcare costs<sup>26</sup> and the need for family to  
42 accompany patients on their journey<sup>15</sup>. Patients without the support of their families in our study  
43 found this to be beneficial. Kaambwa et al<sup>13</sup> found that patients had strong preferences for VC's  
44 when their clinic was between 15-100km away and when their use reduced costs. The dynamics  
45 between the situation and the patient's capacity for care create a unique state of affairs for each  
46 patient at the time of being offered the choice between consultations. These factors directly  
47 influence the patients burden and expectations of care. Consideration of these factors, and  
48 identification of the option with the most utility to the patient, will influence preferences.  
49  
50

51  
52 This study is separated from many others (e.g. in primary care<sup>27</sup> and psychiatry<sup>28</sup> studies) because  
53 orthopaedic rehabilitation often requires 'hands on' care which is not possible virtually. The lack  
54 of touch over VC can inhibit patients experience of receiving care, particularly when they desire it  
55  
56  
57  
58  
59  
60  
29. Patients in the PhysioDirect study of telephone consultations still wanted to have 'proper' F2F

1  
2  
3 physio<sup>30</sup>. VC has been seen as ‘impersonal’<sup>31</sup> and can reduce emotional bonding between the  
4 patient and healthcare professional<sup>29</sup>.  
5

6 A common theme in our data was the negative psychological impact some patients felt seeing  
7 themselves through a screen. This was in accord with a patient in the Jansen-Kasterink study<sup>31</sup>  
8 who reported: *‘I cannot imagine seeing myself on video, I already have trouble seeing myself in a*  
9 *picture’*. Some patients for whom this was not a problem, however, found that being in their own  
10 environment and avoiding travel made them feel more relaxed<sup>10</sup> which could in itself improve  
11 patient-healthcare professional relationships.  
12  
13

14  
15 If offered the choice of a F2F or VC, patients need to give consideration to the alternatives; the  
16 actions, the state of affairs and the consequences of choosing each alternative. The present  
17 research does not suggest how *much* the highlighted factors influences preferences or how these  
18 factors compete with each other. This study will inform the design of a Discrete Choice  
19 Experiment, a deductive investigation to quantitatively measure how each factor influences  
20 preferences for patients in a pragmatic real-world scenario. A thorough understanding of the  
21 effect and influence of preferences will be essential. Such an understanding will enable patient-  
22 centered service design.  
23  
24

25  
26 However, the results of this study should be interpreted in light of their limitations. It was  
27 conducted at a single center and may not translate to other clinical areas. To overcome this,  
28 variation across participants was sought and attention focused towards more general factors to  
29 allow for transportability to other clinical settings. Flexible options for patients and healthcare  
30 professionals to were provided to participate, both over phone and Skype as well as F2F. The lead  
31 researcher (AG) is a healthcare professional within the centre which could have led to bias results  
32 through local familiarity. This was taken into account in the data analysis through a process of  
33 defamiliarization; attributions for each data point were orientated into a taxonomy to facilitate  
34 model development. Raw interview data was used to verify and illustrate the model.  
35  
36  
37

### 38 Potential impact of Covid-19 pandemic on the future of videoconferencing

39  
40 The empirical data collection for this research was conducted prior to the COVID-19 pandemic.  
41 The COVID-19 pandemic has accelerated the introduction of VC across healthcare. The rapid  
42 implementation of VC<sup>9</sup> may shape the future of this work in a way that was not previously  
43 anticipated. The COVID-19 ‘situation’ has influenced an increased uptake of VC in practice. Further  
44 research evaluating the use of VC during the COVID-19 pandemic will support future service  
45 redesign.  
46  
47  
48

## 49 **Conclusions**

50  
51 We conducted 44 qualitative interviews to gain a thorough understanding of the mechanisms that  
52 influence patient preference. Multiple factors were identified: The situation, the expectations, the  
53 demand and the capacity. Factors may combine or compete with each other to influence  
54 preference. The patient’s situation is dynamic and therefore preferences must also be dynamic.  
55 An understanding of preferences is essential to support the design of patient care pathways  
56 incorporating videoconferencing for consultations. The model presented here can be used to  
57  
58  
59  
60

1  
2  
3 inform quantitative studies such as discrete choice experiments, and could act as a programme  
4 theory to inform future trials.  
5  
6  
7  
8  
9

10 **3874 excl tables**  
11  
12  
13  
14  
15  
16  
17  
18  
19  
20  
21  
22  
23  
24  
25  
26  
27  
28  
29  
30  
31  
32  
33  
34  
35  
36  
37  
38  
39  
40  
41  
42  
43  
44  
45  
46  
47  
48  
49  
50  
51  
52  
53  
54  
55  
56  
57  
58  
59  
60

For peer review only

## Abbreviations

BoT – Burden of Treatment Theory

CONNECT (Project) – Care in Orthopaedics, burdeN of treatmeNt and the Effect of Communication Technology

F2F – face-to-face care

VC – virtual consultation

## Declarations

### Ethics approval and consent to participate

Ethical approval was received for this study (Approval received 4<sup>th</sup> December 2018 from the South Central-Oxford C Research Ethics Committee [IRAS ID: 255172, REC Reference 18/SC/0663]). All participants were provided with a participant information sheet and given at least 24 hours to consider the information and ask questions before being recruited into the study. All participants provided informed, written consent prior to enrolment.

### Availability of data and materials

The datasets used and/or analysed during the current study are available from the corresponding author on reasonable request.

### Competing interests

None to declare

### Funding

Anthony Gilbert is funded by a National Institute for Health Research (NIHR), Clinical Doctoral Research Fellowship for this research project (ICA-CDRF-2017-03-025).

### Patient and Public Involvement

The CONNECT Project Patient and Public Involvement steering group (PPISG) has been set up to provide guidance on the conduct of the research (details available from [www.theconnectproject.info](http://www.theconnectproject.info)). The first meeting of the PPISG was held in August 2016 prior to the submission of the research to the National Institute for Health Research in May 2017. A discussion was held about the overall research aims which supported the identification of the research questions. The PPISG has supported the design of the overall research plan and will continue to be involved during the development and refinement of each phase prior to the completion of each study protocol. The participant information and consent forms and the discussion guide for this research was reviewed by the PPISG. In addition, the PPISG will support the development of the lay summary outputs to be disseminated to patients and the public.

## Authors' contributions

AG wrote the paper and conceived the project with CRM, JJ and MS. CRM guided qualitative data collection. AG conducted all the interviews. CRM assisted with data analysis, and with AG developed the model. CRM, JJ and MS edited and critically revised the paper. All authors have read and approved the manuscript. AG is the guarantor of the manuscript.

## Acknowledgements

The authors thank members of the CONNECT Project Patient and Public Involvement steering group for their invaluable contributions to the overall study design of the CONNECT Project and obtaining funding for the PhD Fellowship. The authors also thank colleagues within the Therapies Directorate and Research and Innovation Centre at the Royal National Orthopaedic Hospital for their ongoing support. The authors are grateful to the patients and members of staff who participated in this study.

## References

1. Health BCMo. Primary and Community Care in BC: A Strategic Policy Framework 2015 [Available from: <https://www.health.gov.bc.ca/library/publications/year/2015/primary-and-community-care-policy-paper.pdf> accessed 28th February 2020 2020.
2. Australia GUT. Financial Incentives for Telehealth Canberra, AU2012 [Available from: [https://gp2u.com.au/static/documents/Telehealth\\_Program\\_Guidelines\\_effective\\_1\\_July\\_2012.pdf](https://gp2u.com.au/static/documents/Telehealth_Program_Guidelines_effective_1_July_2012.pdf) accessed 28th February 2020.
3. NHS. The NHS Long Term Plan. In: Health Do, ed. Online, 2019.
4. Garber S, Gates SM, Keeler EB, et al. Redirecting Innovation in U.S. Health Care: Options to Decrease Spending and Increase Value. *Rand Health Quarterly* 2014;4(1):3-3.
5. Mahendradhata Y, Trisnantoro L, Listyadewi S, et al. The Republic of Indonesia health system review: Health Systems in Transition; 2017  
[<https://apps.who.int/iris/bitstream/handle/10665/254716/9789290225164-eng.pdf;sequence=1>]. Available from: <https://apps.who.int/iris/bitstream/handle/10665/254716/9789290225164-eng.pdf> accessed 16th December 2019.
6. Armfield NR, Bradford M, Bradford NK. The clinical use of Skype—For which patients, with which problems and in which settings? A snapshot review of the literature. *International Journal of Medical Informatics* 2015;84(10):737-42. doi: 10.1016/j.ijmedinf.2015.06.006
7. Greenhalgh T, Koh GCH, Car J. Covid-19: a remote assessment in primary care. *BMJ (Clinical research ed)* 2020;368:m1182. doi: 10.1136/bmj.m1182
8. Greenhalgh T, Wherton J, Shaw S, et al. Video consultations for covid-19. *BMJ (Clinical research ed)* 2020;368:m998. doi: 10.1136/bmj.m998
9. Gilbert A, Billany J, Adam R, et al. Rapid implementation of virtual clinics due to COVID-19: Report and early evaluation of a Quality Improvement initiative. *BMJ Open Quality* 2020;9e000985. doi: 10.1136/bmjopen-2020-000985
10. Greenhalgh T, Shaw S, Vijayaraghavan S, et al. Real-world implementation of video outpatient consultations at macro, meso, and micro levels: Mixed-method study. *Journal of Medical Internet Research* 2018;20(4) doi: 10.2196/jmir.9897
11. Mair F, May C, O'Donnell C, et al. Factors that promote or inhibit the implementation of e-health systems: an explanatory systematic review. *Bulletin of the World Health Organization* 2012;90:357-64. doi: doi: 10.2471/BLT.11.099424
12. Hausman DM. Preference, Value, Choice, and Welfare: Cambridge University Press 2012.
13. Kaambwa B, Ratcliffe J, Shulver W, et al. Investigating the preferences of older people for telehealth as a new model of health care service delivery: A discrete choice experiment. *Journal of Telemedicine and Telecare* 2016;23(2):301-13. doi: 10.1177/1357633X16637725
14. Gilbert A, Jaggi A, Jones J, et al. What Is The Effect Of Communication Technology On The Work Of Being A Patient In Orthopaedics? A Systematic Review...38th Scientific Meeting of the Physiotherapy Research Society, April 26, 2019, London South Bank University, London, England. *International Journal of Therapy & Rehabilitation* 2019;26(6):3-3. doi: 10.12968/ijtr.2019.26.6.3
15. Gilbert AW, Jaggi A, May CR. What is the acceptability of real time 1:1 videoconferencing between clinicians and patients for a follow-up consultation for multi-directional shoulder instability? *Shoulder & Elbow* 2019;11(1):53-59. doi: 10.1177/1758573218796815
16. Gilbert AW, Jaggi A, May CR. What is the patient acceptability of real time 1:1 videoconferencing in an orthopaedics setting? A systematic review. *Physiotherapy (United Kingdom)* 2018;104(2):178-86. doi: 10.1016/j.physio.2017.11.217
17. Lippiett KA, Richardson A, Myall M, et al. Patients and informal caregivers' experiences of burden of treatment in lung cancer and chronic obstructive pulmonary disease (COPD): a systematic review and synthesis of qualitative research. *BMJ Open* 2019;9(2):e020515-e15. doi: 10.1136/bmjopen-2017-020515
18. Gallacher K, I., May C, R., Langhorne P, et al. A conceptual model of treatment burden and patient capacity in stroke. *BMC Family Practice* 2018(19):9. doi: 10.1186/s12875-017-0691-4

19. Shippee ND, Allen SV, Leppin AL, et al. Attaining minimally disruptive medicine: Context, challenges and a roadmap for implementation. *Journal of the Royal College of Physicians of Edinburgh* 2015;45(2):118-22. doi: 10.4997/JRCPE.2015.206
20. Wall PDH, Sprowson AP, Parsons N, et al. Protocol for a single-centre randomised controlled trial of multimodal periarticular anaesthetic infiltration versus single-agent femoral nerve blockade as analgesia for total knee arthroplasty: Perioperative Analgesia for Knee Arthroplasty (PAKA). *BMJ Open* 2015;5(12):e009898-e98. doi: 10.1136/bmjopen-2015-009898
21. May C. Towards a general theory of implementation. *Implementation Science* 2013;8(1) doi: 10.1186/1748-5908-8-18
22. May, C Montori, VM, Mair, FS. We need minimally disruptive medicine. *BMJ: British Medical Journal* 2009;339(7719):485.
23. Gilbert AW, Jones J, Stokes M, et al. Protocol for the CONNECT Project: a mixed methods study investigating patient preferences for communication technology use in orthopaedic rehabilitation consultations. *BMJ Open* 2019;(Epub ahead of Print) doi: 10.1136/bmjopen-2019-035210
24. May CR, Hunt K, May CM, et al. Rethinking the patient: Using Burden of Treatment Theory to understand the changing dynamics of illness. *BMC Health Services Research* 2014;14(1) doi: 10.1186/1472-6963-14-281
25. O'Brien BC, Harris IB, Beckman TJ, et al. Standards for reporting qualitative research: A synthesis of recommendations. *Academic Medicine* 2014;89(9):1245-51. doi: 10.1097/ACM.0000000000000388
26. Powell RE, Henstenburg JM, Cooper G, et al. Patient perceptions of telehealth primary care video visits. *Annals of Family Medicine* 2017;15(3):225-29. doi: 10.1370/afm.2095
27. Donaghy E, Hammersley V, Bikker A, et al. Acceptability, benefits, and challenges of video consulting: A qualitative study in primary care. *British Journal of General Practice* 2019;69(686):E586-E94. doi: 10.3399/bjgp19X704141
28. Wynn R, Bergvik S, Pettersen G, et al. Clinicians' experiences with videoconferencing in psychiatry. *Studies in health technology and informatics* 2012;180:1218-20.
29. Cranen K, Drossaert CHC, Brinkman ES, et al. An exploration of chronic pain patients' perceptions of home telerehabilitation services. *Health Expectations* 2012;15(4):339-50. doi: 10.1111/j.1369-7625.2011.00668.x
30. Pearson J, Richardson J, Calnan M, et al. The acceptability to patients of PhysioDirect telephone assessment and advice services; a qualitative interview study, 2016.
31. Jansen-Kosterink S, In 't Veld RH, Hermens H, et al. A Telemedicine Service as Partial Replacement of Face-to-Face Physical Rehabilitation: The Relevance of Use. *Telemedicine Journal And E-Health: The Official Journal Of The American Telemedicine Association* 2015;21(10):808-13. doi: 10.1089/tmj.2014.0173



1  
2  
3  
4  
5  
6  
7  
8  
9  
10  
11  
12  
13  
14  
15  
16  
17  
18  
19  
20  
21  
22  
23  
24  
25  
26  
27  
28  
29  
30  
31  
32  
33  
34  
35  
36  
37  
38  
39  
40  
41  
42  
43  
44  
45  
46  
47  
48  
49  
50  
51  
52  
53  
54  
55  
56  
57  
58  
59  
60

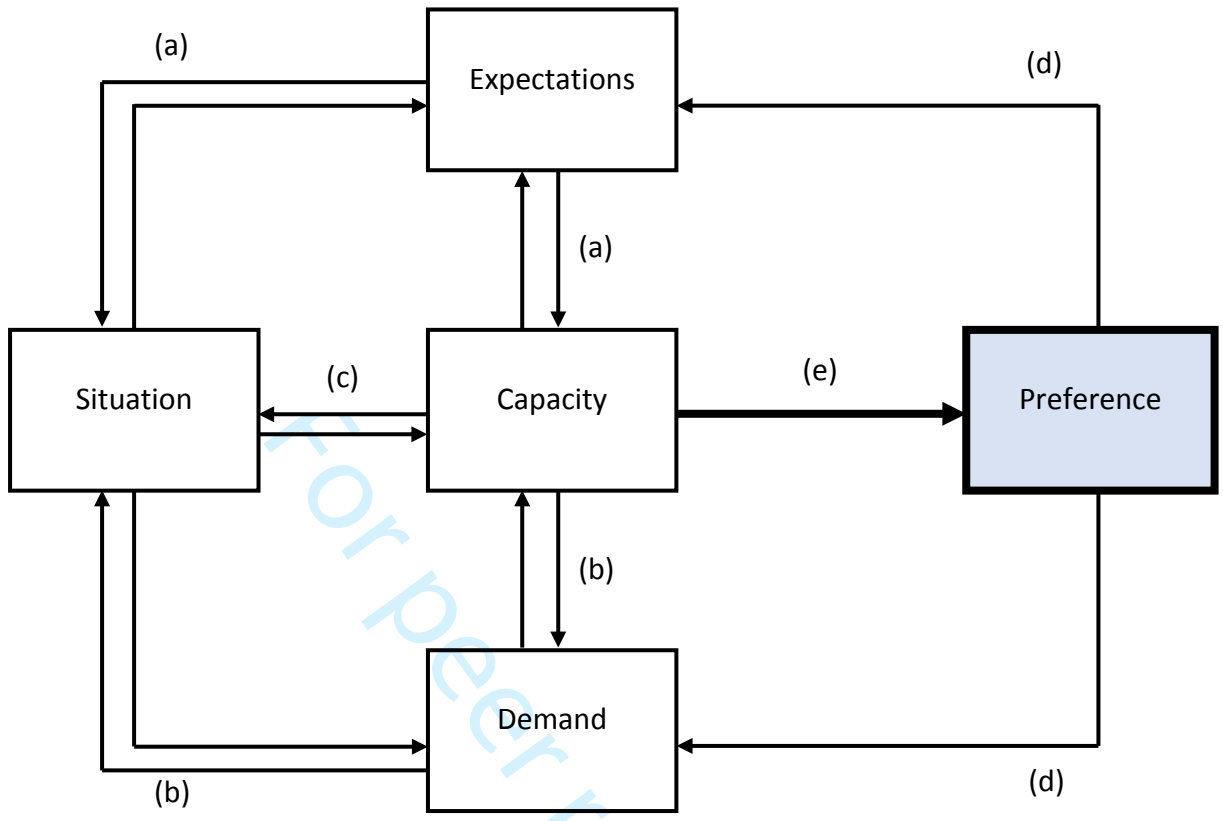

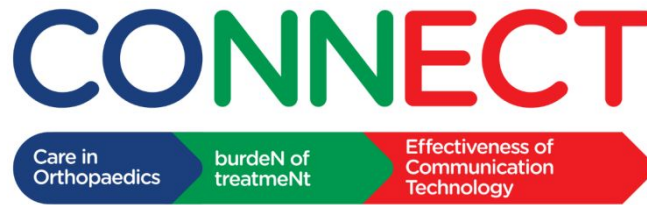

## CONNECT Project Topic Guide

### Part 1 – Burden of Treatment

- **Impact on Patient:** how technology consultations influence the experience of living with illness and engagement with clinical care

What was life like before you got your condition?

How does your condition affect you with daily life?

- Family
- Friends
- Work
- Hobbies
- Day to day activities and routine

Does anyone support you to manage your condition?

How do you manage your condition?

- Routine stuff
- Managing exacerbations

What medical services do you interact with, what for?

- Regularity?

How would using communication technology impact on how you manage your condition?

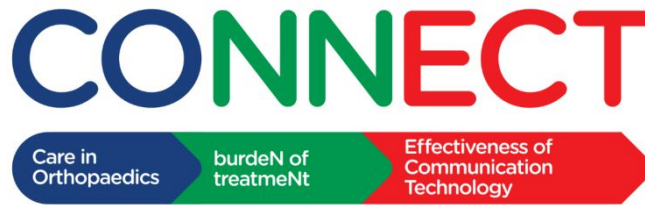

## Part 2 – Results of Phase 1

- **Skills:** what were needed, how were they gained, how were they enacted in practice.

*What skills do you think you would need in order to use Communication technology for your [physio / OT]? (Is there any difference between the two?)*

*Do you have the skills now? How would you get them? How could the RNOH support you to get them?*

*Describe how you think communication technology use would look in reality*

- **Clinical Interactions:** impact of technology consultations on clinical interactions

*What is the relationship like with you and your clinician now? Would it be different using communication technology? What could you still do? What couldn't you do? How would this make you feel?*

*How would it be with someone different? What would be 'a good person'. What would be a 'bad person'.*

- **Environment:** the location and resources required to engage with clinical rehabilitation

*What would you physically need to use communication technology? Where would you get it from? Where would you like to get it from (ie self-sourced or hospital sourced)*

*Where would you use it from? What space would you need to achieve the objectives of the consultation?*

- **Processes:** how technology consultations affect routine clinical practice

*What has your journey been as an RNOH patient (previous care, how they got referred, waiting time, experience of being a patient, dealing with other services?)*

*How would this change with using communication technology? Wat would be better? What would be worse?*

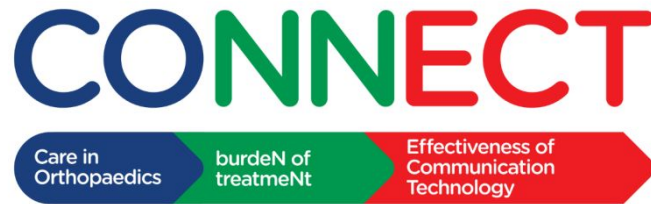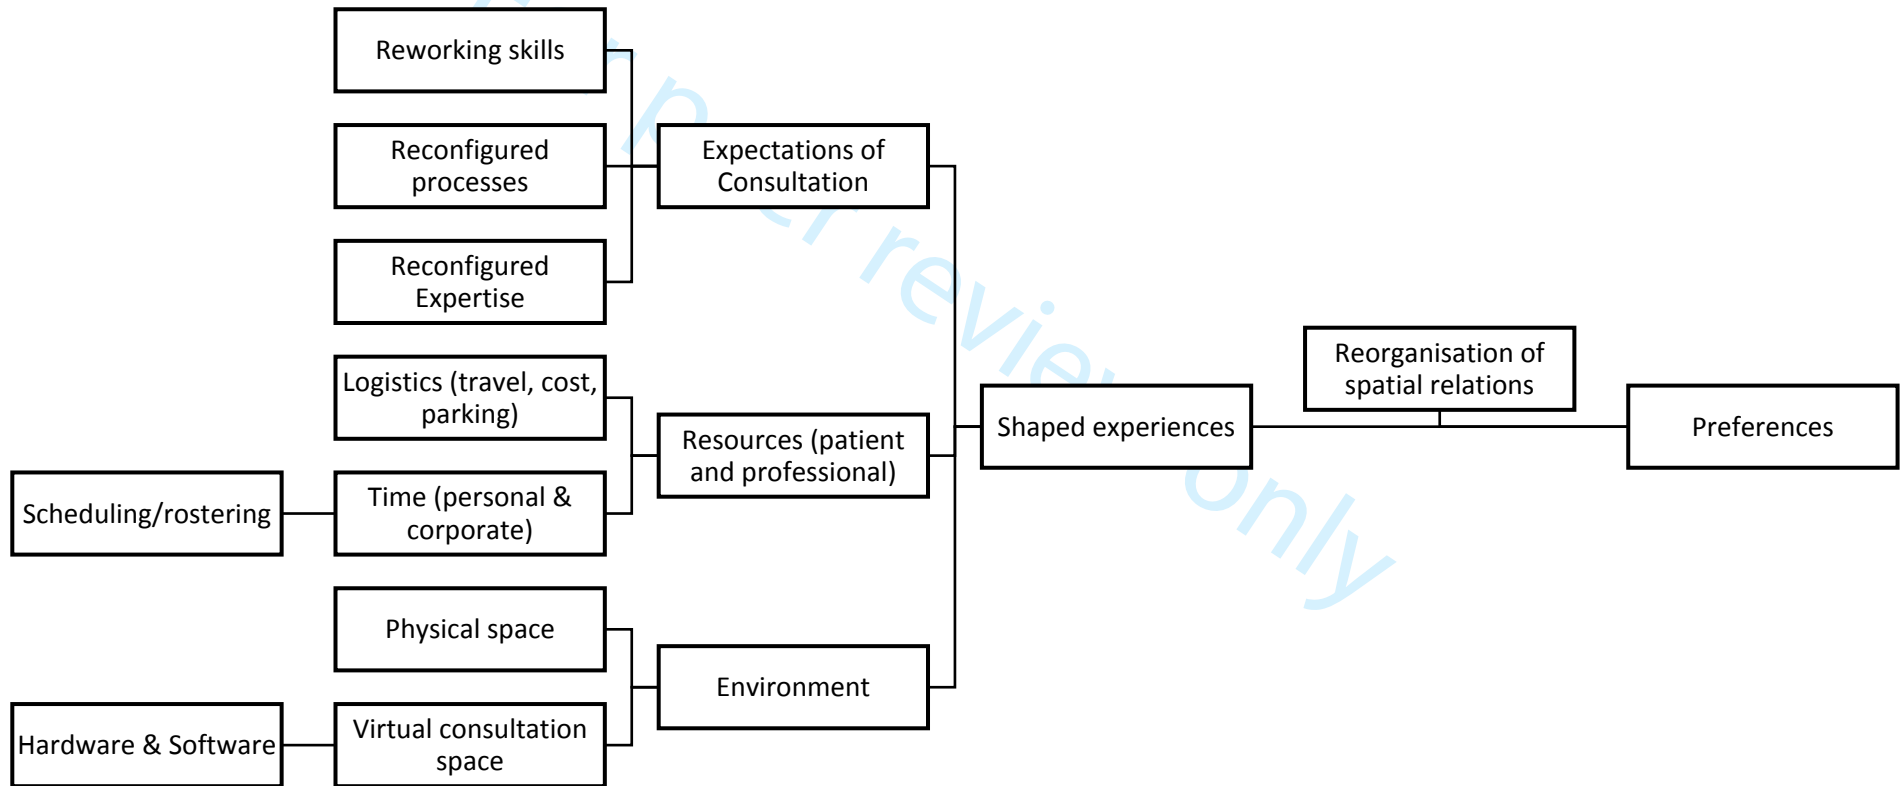

1  
2  
3  
4  
5  
6  
7  
8  
9  
10  
11  
12  
13  
14  
15  
16  
17  
18  
19  
20  
21  
22  
23  
24  
25  
26  
27  
28  
29  
30  
31  
32  
33  
34  
35  
36  
37  
38  
39  
40  
41  
42  
43  
44  
45  
46

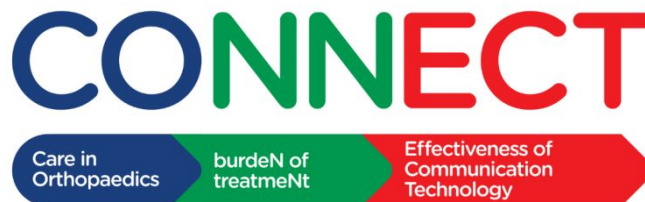

## Part 3 – DCE Design

- **Preferences:** the potential patients see for technology as an alternative to routine face to face care

In what situations would you be happy to use technology?

In what situations would you not be happy to use?

What would use look like for you at the RNOH?

What would we need to consider? From a personal perspective? From others' perspective?

Anything you would like to add that might help the research?

1  
2  
3  
4 Title

5  
6 Abstract

7  
8  
9 Problem Formulation  
10 Purpose or research question

11  
12  
13  
14  
15  
16  
17  
18  
19  
20 Context

21  
22 Sampling strategy

23  
24 Ethical issues pertaining to human subjects

25  
26  
27  
28  
29  
30 Data collection instruments and technologies  
31 Units of study

32  
33 Data processing

34  
35 Data analysis

36  
37  
38 Techniques to enhance trustworthiness

39  
40  
41 Synthesis and interpretation  
42 Links to empirical data

43  
44  
45  
46  
47 Limitations

48 Conflicts of interest

49 Funding

**Item**

- Item 1. Title: Concise description of the nature and topic of the study. Identifying the study as qualitative or indicating the approach (e.g., ethnography, grounded theory) or data collection methods (e.g., interview, focus group, diary, etc.).
- Item 2. Abstract: Summary of key elements of the study using the abstract format of the intended publication; typically includes background, purpose, methods, results, and conclusions.
- Item 3. Problem Formulation: Description and significance of the problem/phenomenon studied; review of relevant theory and empirical work; problem statement.
- Item 4. Purpose or research question: Purpose of the study and specific objectives or questions.
- Item 5. Qualitative approach and research paradigm: Qualitative approach (e.g., ethnography, grounded theory, case study, phenomenology, narrative research) and guiding theory if appropriate; identifying the research paradigm (e.g., post-positivist, constructivist/interpretivist) is also recommended; rationale.
- Item 6. Researcher characteristics and reflexivity: Researchers' characteristics that may influence the research, including personal attributes, qualifications/experience, relationship with participants, assumptions, and/or presuppositions; potential or actual interaction between researchers' characteristics and the research questions, approach, methods, results and/or conclusions.
- Item 7. Context: Setting/site and salient contextual factors; rationale.
- Item 8. Sampling strategy: How and why research participants, documents, or events were selected; criteria for deciding when no further sampling was necessary (e.g., sampling saturation); rationale.
- Item 9. Ethical issues pertaining to human subjects: Documentation of approval by an appropriate ethics review board and participant consent, or explanation for lack thereof; other confidentiality and data security issues.
- Item 10. Data collection methods: Types of data collected; details of data collection procedures including (as appropriate) start and stop dates of data collection and analysis, iterative process, triangulation of sources/methods, and modification of procedures in response to evolving study findings; rationale.
- Item 11. Data collection instruments and technologies: Description of instruments (e.g., interview guides, questionnaires) and devices (e.g., audio recorders) used for data collection; if/how the instrument(s) were used.
- Item 12. Units of study: Number and relevant characteristics of participants, documents, or events included.
- Item 13. Data processing: Methods for processing data prior to and during analysis, including transcription, data entry, data management and security, verification of data integrity, data coding and anonymization / de-identification.
- Item 14. Data analysis: Process by which inferences, themes, etc. were identified and developed, including the researchers involved in data analysis; usually references a specific paradigm or approach; rationale.
- Item 15. Techniques to enhance trustworthiness: Techniques to enhance trustworthiness and credibility of data analysis, (e.g., member checking, triangulation, audit trail); rationale.
- Item 16. Synthesis and interpretation: Main findings (e.g., interpretations, inferences, and themes); might include development of a theory or model, or integration with prior research or theory.
- Item 17. Links to empirical data: Evidence (e.g., quotes, field notes, text excerpts, photographs) to support findings.
- Item 18. Integration with prior work, implications, transferability, and contribution(s) to the field: Short summary of main findings, explanation of how findings and conclusions connect to, support, elaborate on, or challenge conclusions of earlier scholarship; discussion of scope of application/generalizability; identification of limitations.
- Item 19. Limitations: Trustworthiness and limitations of findings.
- Item 20. Conflicts of interest: Potential sources of influence or perceived influence on study conduct and findings.
- Item 21. Funding: Sources of funding and other support; role of funders in data collection, interpretation, and dissemination.

|    |                 |
|----|-----------------|
| 1  |                 |
| 2  | <b>Page</b>     |
| 3  |                 |
| 4  | page 1          |
| 5  |                 |
| 6  | page 2          |
| 7  |                 |
| 8  |                 |
| 9  | page 4          |
| 10 | page 4          |
| 11 |                 |
| 12 |                 |
| 13 |                 |
| 14 | page 4          |
| 15 |                 |
| 16 |                 |
| 17 |                 |
| 18 |                 |
| 19 | page 16         |
| 20 | page 4          |
| 21 |                 |
| 22 | page 4          |
| 23 |                 |
| 24 |                 |
| 25 | page 18         |
| 26 |                 |
| 27 |                 |
| 28 | page 4          |
| 29 |                 |
| 30 |                 |
| 31 | page 4          |
| 32 | page 5          |
| 33 |                 |
| 34 | pages 4 & 5     |
| 35 |                 |
| 36 |                 |
| 37 | pages 4 & 5     |
| 38 |                 |
| 39 | page 4          |
| 40 |                 |
| 41 |                 |
| 42 | pages 5 - 17    |
| 43 | pages 7,9,11,13 |
| 44 |                 |
| 45 |                 |
| 46 | page 17         |
| 47 | pages 16 & 17   |
| 48 |                 |
| 49 | page 18         |
| 50 | page 18         |
| 51 |                 |
| 52 |                 |
| 53 |                 |
| 54 |                 |
| 55 |                 |
| 56 |                 |
| 57 |                 |
| 58 |                 |
| 59 |                 |
| 60 |                 |

For peer review only



# BMJ Open

## What factors influence patient preference for virtual consultations in an orthopaedic rehabilitation setting? A qualitative analysis

|                                 |                                                                                                                                                                                                                                                                                                                                                                                                                                   |
|---------------------------------|-----------------------------------------------------------------------------------------------------------------------------------------------------------------------------------------------------------------------------------------------------------------------------------------------------------------------------------------------------------------------------------------------------------------------------------|
| Journal:                        | <i>BMJ Open</i>                                                                                                                                                                                                                                                                                                                                                                                                                   |
| Manuscript ID                   | bmjopen-2020-041038.R1                                                                                                                                                                                                                                                                                                                                                                                                            |
| Article Type:                   | Original research                                                                                                                                                                                                                                                                                                                                                                                                                 |
| Date Submitted by the Author:   | 11-Oct-2020                                                                                                                                                                                                                                                                                                                                                                                                                       |
| Complete List of Authors:       | Gilbert, Anthony; Royal National Orthopaedic Hospital Stanmore, Therapies Department; University of Southampton, Faculty of Health Sciences<br>Jones, Jeremy; University of Southampton, Faculty of Health Sciences<br>Stokes, Maria; University of Southampton, Faculty of Health Sciences<br>May, Carl; London School of Hygiene and Tropical Medicine Faculty of Public Health and Policy; NIHR Applied Research Collaboration |
| <b>Primary Subject Heading</b>: | Health services research                                                                                                                                                                                                                                                                                                                                                                                                          |
| Secondary Subject Heading:      | Qualitative research                                                                                                                                                                                                                                                                                                                                                                                                              |
| Keywords:                       | QUALITATIVE RESEARCH, ORTHOPAEDIC & TRAUMA SURGERY, HEALTH SERVICES ADMINISTRATION & MANAGEMENT                                                                                                                                                                                                                                                                                                                                   |
|                                 |                                                                                                                                                                                                                                                                                                                                                                                                                                   |

SCHOLARONE™  
Manuscripts



I, the Submitting Author has the right to grant and does grant on behalf of all authors of the Work (as defined in the below author licence), an exclusive licence and/or a non-exclusive licence for contributions from authors who are: i) UK Crown employees; ii) where BMJ has agreed a CC-BY licence shall apply, and/or iii) in accordance with the terms applicable for US Federal Government officers or employees acting as part of their official duties; on a worldwide, perpetual, irrevocable, royalty-free basis to BMJ Publishing Group Ltd ("BMJ") its licensees and where the relevant Journal is co-owned by BMJ to the co-owners of the Journal, to publish the Work in this journal and any other BMJ products and to exploit all rights, as set out in our [licence](#).

The Submitting Author accepts and understands that any supply made under these terms is made by BMJ to the Submitting Author unless you are acting as an employee on behalf of your employer or a postgraduate student of an affiliated institution which is paying any applicable article publishing charge ("APC") for Open Access articles. Where the Submitting Author wishes to make the Work available on an Open Access basis (and intends to pay the relevant APC), the terms of reuse of such Open Access shall be governed by a Creative Commons licence – details of these licences and which [Creative Commons](#) licence will apply to this Work are set out in our licence referred to above.

Other than as permitted in any relevant BMJ Author's Self Archiving Policies, I confirm this Work has not been accepted for publication elsewhere, is not being considered for publication elsewhere and does not duplicate material already published. I confirm all authors consent to publication of this Work and authorise the granting of this licence.

## *BMJ OPEN*

# What factors influence patient preference for virtual consultations in an orthopaedic rehabilitation setting? A qualitative analysis

### Authors

1. Anthony W Gilbert<sup>1, 2, 3</sup>
2. Jeremy Jones<sup>2</sup>
3. Maria Stokes<sup>2,4</sup>
4. Carl R May<sup>3,5</sup>

### Author Affiliations

1. Therapies Department, Royal National Orthopaedic Hospital, Stanmore, UK.
  2. School of Health Sciences, Faculty of Environmental and Life Sciences, University of Southampton, Southampton, UK
  3. NIHR Applied Research Collaboration, North Thames.
  4. NIHR Applied Research Collaboration, Wessex
  5. Faculty of Public Health and Policy, London School of Hygiene and Tropical Medicine, London, UK
- 5.

Corresponding author: Anthony Gilbert [anthony.gilbert@nhs.net](mailto:anthony.gilbert@nhs.net)

## Abstract

**Objectives:** To identify characterize and explain factors that influence patient preferences, from the perspective of patients and clinicians, for virtual consultations in an orthopaedic rehabilitation setting.

**Design:** Qualitative study using semi-structured interviews and abductive analysis.

**Setting:** A physiotherapy and occupational therapy department situated within a tertiary orthopaedic centre in the UK.

**Participants:** Patients who were receiving orthopaedic rehabilitation for a musculoskeletal problem. Occupational therapists, physiotherapists or therapy technicians involved in the delivery of orthopaedic rehabilitation for patients with a musculoskeletal problem.

**Results:** Twenty-two patients and twenty-two healthcare professionals were interviewed. The average interview length was forty-eight minutes. Four major factors were found to influence preference: the situation (the ways that patients understand and explain their clinical status, their treatment requirements, and the care pathway), the expectations of care (influenced by a patients desire for contact, psychological status, previous care and perceived requirements), the demands (of care, of each patients respective social situation and the consequences of choice) and the capacity (the patient's ability to allocate resources to care; these include financial, infrastructural, social and healthcare resources).

**Conclusion:** This study has identified key factors that appear to influence patient preference for virtual consultations in orthopaedic rehabilitation..A conceptual model of these factors, derived from empirical data, has been developed highlighting how they combine and compete. A series of questions, based on these factors, have been developed to support identification of preferences in a clinical setting.

## Strengths and limitations of this study

- This is the first qualitative investigation of patient preferences for virtual consultation in a tertiary orthopaedic setting.
- Theoretical insights and explanations generated from this paper are developed from empirical data.
- Maximum variation sampling and abductive qualitative analysis reveal key factors that shape patient preferences.
- Single site qualitative study is not generalisable but mechanistic model is transportable between settings.

## Background

Videoconferencing technologies, such as Skype, Zoom, Attend Anywhere and MS Teams, have been received enthusiastically by healthcare policy makers<sup>1-3</sup> as they provide a medium to improve access to care. The technology is also viewed as a significant contributor to health and wealth<sup>4</sup> and efficiency gain strategies<sup>5</sup>. Communication technologies such as videoconferencing are being used across many fields of healthcare<sup>6</sup> and can offer advantages to patients. In January 2020, the United Kingdom recorded its first case of Novel Coronavirus (COVID-19). The outbreak of COVID-19 placed the NHS under significant strain. Social distancing measures were introduced in the United Kingdom in March 2020 and Virtual Consultations (VC) (via telephone or video call) were identified as a potential alternative to face-to-face consultations at this time<sup>7 8</sup>. Organisations were forced to rapidly implement VC as a consequence of COVID-19<sup>9</sup>.

Greenhalgh et al<sup>10</sup> conducted a multilevel mixed methods study of Skype consultations and found that they were safe, effective and convenient for patients when healthcare professionals judged them clinically appropriate. However, the authors<sup>10</sup> found that the reality of establishing VCs in outpatient services was more complex than originally anticipated. This complexity is a longstanding problem in the implementation of telemedicine and telecare systems<sup>11</sup>.

### Patient preferences and burden of treatment

A preference can be defined as an individualised 'total subjective comparative evaluation'<sup>12</sup>. Put simply, an individual weighs up the characteristics of alternatives to make a decision. Preference theory suggests that a person will prefer the outcome that yields greatest utility, and therefore that patients would prefer a VC if they believe its benefits outweigh its burdens<sup>12</sup>. To date, patient preferences for telemedicine have only been investigated at a general population level<sup>13</sup>.

VCs have been shown to change what is required of patients<sup>14 15 16</sup>. A workload for patients that exceeds their capacity has been demonstrated to be a driver of treatment burden for those with lung cancer and chronic obstructive pulmonary disease<sup>17</sup>. Treatment burden in patients with stroke has been shown to be influenced by the quality and configurations of healthcare<sup>18</sup>. What is not yet understood is how changes in the work and demands of being a patient as a result of VC influence preference for VC in a healthcare setting.

Patients' and professionals' preferences for telemedicine are not isolated from their other experiences of healthcare, or from the ways that they experience other aspects of their lives. If we are interested in the ways that patients understand and calculate the relationship between benefits and burdens, then we should also include burdens in our investigation. Shippee et al's<sup>19</sup> cumulative complexity model assumes an arithmetical relationship between delegated health system workload and individual patient capacity, and suggests that this explains healthcare utilization. However, health behaviours and service utilisation take place in a broader social context, and Burden of Treatment theory (BoT)<sup>20</sup> provides a way into this problem. BoT explains the relationship between the demands that participating in healthcare places on patients and caregivers (their workload), and the affective, cognitive, relational and material resources that they can bring to bear on this workload (their capacity).<sup>21 22</sup>

1  
2  
3 To our knowledge, no studies have yet investigated the relationship between patient preferences  
4 around telemedicine services and their experience of burden of treatment. We need to better  
5 understand this to support the development of care pathways that take into account what offers  
6 patients increased utility. This paper therefore aims to identify, characterise, and explain factors  
7 that influence patient preferences for VCs in an orthopaedic rehabilitation setting.  
8  
9

## 10 11 Methods

12 This research forms phase II of the CONNECT Project. The protocol for the CONNECT Project has  
13 been published elsewhere<sup>23</sup>.  
14

### 15 16 Setting

17 The research was conducted within a single specialist orthopaedic hospital in North London, UK.  
18 All participants were recruited from the Occupational Therapy and Physiotherapy Department.  
19  
20

### 21 22 Participants

23 A maximum variation sample was recruited. This included 22 patients and 22 healthcare  
24 professionals (see table 1 for the inclusion and exclusion criteria). We aimed to recruit as least 10  
25 male and 10 female patients (10 <50 years, 10 >50 years) and 20 healthcare professionals  
26 (occupational therapists and physiotherapists). Patients were selected to be interviewed to  
27 identify factors that influence patient preferences for VCs. Clinicians were selected to be  
28 interviewed to provide their perspectives on patient preference and as patient preferences are  
29 moderated by the possibilities and preferences of organisations and staff. The first two patients  
30 and healthcare professionals were used to pilot the interview schedule (See Supplementary  
31 Materials 1-2).  
32  
33  
34

### 35 36 Recruitment

37 The study was advertised using a pop-up banner in the Occupational Therapy and Physiotherapy  
38 Departments. Patients were encouraged to discuss the study with their treating healthcare  
39 professional or could approach the researcher directly via email. Healthcare professionals were  
40 sent a departmental wide email informing them of the study both from the perspective of  
41 discussing with patients as well as enrolling as a participant. Suitable and interested potential  
42 participants were provided with a participant information sheet and given at least 24 hours to  
43 discuss the study with the researcher. They were enrolled in the study upon receipt of informed  
44 written consent.  
45  
46  
47  
48  
49  
50  
51  
52  
53  
54  
55  
56  
57  
58  
59  
60

### Data Collection

Design of the interview schedules were formed by Burden of Treatment Theory<sup>24</sup> (see supplementary materials 1-2) and the results of Phase I of the CONNECT Project<sup>25</sup>. Interviews were conducted on site at the hospital or virtually using phone or SKYPE. Interviews were conducted by AWG and were to last around 60 minutes with the option to extend or shorten as required. All interviews were audio recorded and sent off for transcription to an external company. All transcripts were emailed or posted to participants upon receipt to give them the option to verify the data or to make any adjustments.

### Data Analysis

Interview transcripts were reviewed and uploaded into NVIVO (version 12). Data analysis followed the principles of abduction as set out by Tavory and Timmermans<sup>26</sup>. Coding was undertaken by AWG and CRM. Open coding techniques were used to identify empirical regularities (themes) in the data. Data that matched the results of the CONNECT Project Phase I were temporarily set aside; this research sought abductive 'surprises' (new themes) in additions to those gained from our previous work. The new themes were interrogated for attributions about patient preferences and the factors that shape them. Attributions were assigned to codes within these new themes following discussion between AWG & CRM. Attributions were subsequently discussed between AWG and JJ to ensure they made sense and were accurate representations of these data. No changes were required to attributions at this stage. Inferences were made about the ways that preferences worked, the relative position and significance of the factors that shaped them, forming abductive explanation. Data matching the themes from Phase I were then incorporated once theoretical insights were formed. Finally, themes arising from the data were mapped out in a model by AWG to visualise how different factors might influence preference for communication technology. The theoretical model was reviewed by all authors to verify its content. A summary of these methods can be seen in Figure 1. Reporting was conducted using the Standards for Reporting Qualitative Research<sup>27</sup> (See supplementary material 3).

Figure 1 – flow diagram of methods

Table 1 – Inclusion and exclusion criteria

| Inclusion criteria                                                                                                                                                                                                                                                                                                                                                                                                                                                                                                                                                                         | Exclusion criteria                                                                                                                                                                                                                                                                                                                                                                                                                                                  |
|--------------------------------------------------------------------------------------------------------------------------------------------------------------------------------------------------------------------------------------------------------------------------------------------------------------------------------------------------------------------------------------------------------------------------------------------------------------------------------------------------------------------------------------------------------------------------------------------|---------------------------------------------------------------------------------------------------------------------------------------------------------------------------------------------------------------------------------------------------------------------------------------------------------------------------------------------------------------------------------------------------------------------------------------------------------------------|
| <ul style="list-style-type: none"> <li>• Patients, over the age of 18 years, attending the RNOH for Physiotherapy or Occupational Therapy</li> <li>• Patients who have experience of orthopaedic / musculoskeletal condition</li> <li>• Patients who are able to provide informed written consent to enter into the study</li> <li>• Patients able to understand and speak English or a language covered by the RNOH Interpreter service</li> <li>• Physiotherapists or Occupational Therapists (or assistants) who treat patients with orthopaedic / musculoskeletal disorders</li> </ul> | <ul style="list-style-type: none"> <li>• Patients without the capacity to consent</li> <li>• Patients suffering from disorders other than orthopaedic as the primary cause (eg neurological or oncology disorders)</li> <li>• Physiotherapists or Occupational Therapists who do not currently treat, or have no experience of treating patients with orthopaedic / musculoskeletal disorders</li> <li>• Patients currently or previously treated by AWG</li> </ul> |

## Results

No changes were made to the interview schedule after the pilot interviews and these data were included in the study. Forty-four participants were interviewed in the study; 22 patients (12 female, average age 46 [range 20-78]) and 22 healthcare professionals (13 physiotherapists, 14 female). The average interview length was 48 minutes [range 28 – 81 minutes]. Two patient interviews were conducted over the phone and two over Skype. Two healthcare professional interviews were conducted over the phone. No participants returned their transcripts and therefore no amendments were made.

### Interview Data

Results from interviews are presented by theme and evidenced in tables 2a-2d which present data from both patients and healthcare professionals.

### Theme 1: Situation

The situation represents the ways that patients understand and explain their clinical status, their treatment requirements, and the care pathway.

#### *(i) Clinical status*

Patient preferences varied based on the clinical challenge's patients faced at that time and the patient's capacity to meet the demands the clinical status required. Healthcare professionals had an awareness of the volatile nature of patient's clinical status. Patients who had a long term orthopaedic condition had an awareness that their clinical status has the potential to both worsen



1  
2  
3 and improve with some patients experiencing this degree of volatility. The patients' orthopaedic  
4 problem could stand alone or was in conjunction with other physical or mental health issues.  
5

6 (ii) *Treatment requirements*  
7

8 The requirements of treatment are dependent on the clinical status of the patient, in accordance  
9 with the normal management for that status. A spectrum of management strategies may be  
10 required, some of which traditionally require hands-on treatment and others which can be  
11 delivered without physical contact. Some clinical status' require forced restriction of activities  
12 which make physical attendance challenging, whereas other status' require physical contact.  
13  
14

15 (iii) *Care pathway*  
16

17 Patient preferences are influenced by the care that is available. This includes the length of the  
18 appointment, number of appointments and regularity of these and the time of day of the  
19 appointments. Some patients who found accessing care challenging would feel less inclined to  
20 travel if the appointment was very short at an inconvenient time of day. Others would be  
21 prepared to travel, whatever the offering. Regular repeated appointments can be burdensome for  
22 patients, particularly those with other commitments that might use up capacity. Patients with  
23 infrequent appointments appeared to favour face-to-face (F2F) appointments, although there  
24 were exceptions to this. Healthcare professionals commented on the rigidity of corporate  
25 resources, with some finding the volume of workload reduced their capacity to be flexible, for  
26 instance finding time to support patients with managing their VC.  
27  
28

29 The *Situation* is a factor that influences preference. Each situation is unique to the individual  
30 based on their clinical status, treatment requirements and the availability of care. The situation is  
31 influenced by the *Capacity* of the patient which in turn influences the *Demands* and the  
32 *Expectations* of patients. Whilst certain factors influence preferences for a patient in one  
33 direction, other factors may have an opposite effect.  
34  
35  
36  
37  
38  
39  
40  
41  
42  
43  
44  
45  
46  
47  
48  
49  
50  
51  
52  
53  
54  
55  
56  
57  
58  
59  
60

Table 2a – Theme 1: Situation

| Factor                 | Description                                                                                                                                        | Patients Accounts                                                                                                                                                                                                                                                                                                                                                                                                                                                                                                                                                                                                                                          | Healthcare Professionals Accounts                                                                                                                                                                                                                                                                                                                                                                                                                                                                                                                                                                                                                                                                              |
|------------------------|----------------------------------------------------------------------------------------------------------------------------------------------------|------------------------------------------------------------------------------------------------------------------------------------------------------------------------------------------------------------------------------------------------------------------------------------------------------------------------------------------------------------------------------------------------------------------------------------------------------------------------------------------------------------------------------------------------------------------------------------------------------------------------------------------------------------|----------------------------------------------------------------------------------------------------------------------------------------------------------------------------------------------------------------------------------------------------------------------------------------------------------------------------------------------------------------------------------------------------------------------------------------------------------------------------------------------------------------------------------------------------------------------------------------------------------------------------------------------------------------------------------------------------------------|
| Clinical status        | The healthcare complaint the patient experiences, its stability, reversibility and its impact on the patient in conjunction with other complaints. | <p><i>If I'm having a flare-up, sometimes I can't even leave the house. I get stuck indoors and I just wouldn't be able to do much really [P7]</i></p> <p><i>It was really annoying because it had, like, dislocated, it was dislocated loads before and after to the point that it was really affecting my life. Then I got banned from doing stairs, I couldn't go out here, I couldn't go out there, couldn't really walk anywhere [P5]</i></p>                                                                                                                                                                                                         | <p><i>You go back, and then sometimes they make an x amount of improvement, or they have a flare up and then it goes back a bit because they get really stressed out. They're back to that fearful of movement [C7]</i></p> <p><i>They're not managing those flare-ups particularly well, so they end up missing classes and things like that. It's become a bit of a spiral to have that - the physical is having a knock on the mental which is having a knock-on effect on the physical and they're just spiralling out of control [C14]</i></p>                                                                                                                                                            |
| Treatment requirements | The treatment and management of the complaint that is required. The restrictions imposed on the patient.                                           | <p><i>But after surgery, I was literally bedbound for three months, so for three months I couldn't do anything [P20]</i></p> <p><i>We're just building up my stamina I think at the moment. Not with the hands but with the shoulders. We're just starting slow, building up [P3]</i></p> <p><i>So, they've basically come up with a programme for my gym telling me how often I should do it, giving me encouragement saying you're a bit better [P6]</i></p>                                                                                                                                                                                             | <p><i>... building arm strength, stability, muscle patterning, working whole kinetic chain, core stability, lots and lots of gluteal rehab, putting a big emphasis on to their understanding of what's a good muscle ache and what they should be feeling and what's working to fatigue rather than what's working into their pain, and then understanding what's an okay pain to have, what's okay to work through, what's not okay to work through [C11]</i></p>                                                                                                                                                                                                                                             |
| Care Pathway           | The availability of healthcare to the patient                                                                                                      | <p><i>On a Skype, are you going to have a half an hour appointment? Or are you just - is it just a check up to see that you're doing the exercises correctly and they say, right, okay, fine carry on with those? Or that looks really good. So, I think it depends on the time apart, how far you are from the hospital [P2]</i></p> <p><i>So if it was once every three months, I'd definitely prefer to have - and so, maybe the later stages and everything's better, then I wouldn't mind having the Skype session, but in terms of the actual rehab and getting from surgery back to performance, I'd definitely like to see a physio. [P20]</i></p> | <p><i>...face-to-face slots for me particularly can be - would be really normal to have to wait six to eight weeks for another appointment just because of our system and the vast amount of patients that we have [C15]</i></p> <p><i>I think doing it as an adjunct where it's extra, we just don't have the capacity for a start, even if it was to [text doing], doing things like that. I think that would be difficult to fit in [C1]</i></p> <p><i>At the moment our face-to-faces are an hour. We don't know that when we do virtual it could be actually much more efficient for us. We could do a really good 30-minute telephone consultation and we can actually fit more of them in [C18]</i></p> |

## Theme 2: Expectations

Patients have expectations for both VC and F2F consultations. These expectations are influenced by a patients desire for contact, psychological status, previous care and perceived requirements.

### (i) *Desire for contact*

Patients had beliefs about the effectiveness of a VCs in comparison to a F2F therapy session. They preferred F2F consultations if they believed they would have more favorable outcomes as a result. Patients also preferred F2F contact if they felt their condition was complicated and warranted a physical examination. Healthcare professionals believed that VCs were not capable of delivering the physical aspect of a session.

### (ii) *Psychological status*

Patient motivation and self-efficacy was an important consideration for both patients and healthcare professionals. Some patients felt they were less likely to complete prescribed care if they were attending virtually whereas others felt that VCs could reduce the anxieties associated with F2F interactions and travelling into the hospital. Healthcare professionals had an awareness of the potential limitations of VCs to offer empathy to the patients who desired it.

### (iii) *Previous care*

Patients previous experience influenced their preference for VC. Patients who had built up a good rapport with their current care team felt that they want F2F to continue whereas others felt that, as they trusted their healthcare professionals, they would be willing to try a new innovation. Patients who had received sub-optimal care elsewhere felt that they would be more likely to stick to the status quo if this worked well for them. Healthcare professionals were sensitive to the varied experiences and expectation of patients.

### (iv) *Perceived requirements*

Patients who feel the need for hands on F2F care reported a preference towards F2F care. Patients who did not feel this was necessary did not feel the same way towards this. Care requirements differed based on the individual circumstances of the patient and the length of time of the appointment. Patients who travelled less frequently preferred to receive a physical examination, often as a 'checkup' to assess the physical status of the problem.

Table 2b – Theme 2: Expectations

| Factor                 | Description                                                                                                          | Patients Accounts                                                                                                                                                                                                                                                                                                                                                                                                                                                                                                                     | Healthcare Professionals Accounts                                                                                                                                                                                                                                                                                                                                                                                                                                                                                                                                                              |
|------------------------|----------------------------------------------------------------------------------------------------------------------|---------------------------------------------------------------------------------------------------------------------------------------------------------------------------------------------------------------------------------------------------------------------------------------------------------------------------------------------------------------------------------------------------------------------------------------------------------------------------------------------------------------------------------------|------------------------------------------------------------------------------------------------------------------------------------------------------------------------------------------------------------------------------------------------------------------------------------------------------------------------------------------------------------------------------------------------------------------------------------------------------------------------------------------------------------------------------------------------------------------------------------------------|
| Desire for contact     | Whether the patient / healthcare professional believes the F2F is more of a capable method of care delivery than VC. | <p><i>I'm sure I could do that at home on my own but personally I would feel comfortable knowing I've got a person actually feeling it. [P16]</i></p> <p><i>If it's something simple then, yes, that's a good idea. If it's something a bit more complicated they actually have to come and see it because it's more of a hands-on type of thing [P8]</i></p>                                                                                                                                                                         | <p><i>we definitely can't do is gait re-education or gait analysis. We could probably demonstrate exercises ourselves, but actually if we're looking at a movement habit in terms of, say, how someone's shoulder moves, or you need to really see or perhaps feel what that is, I think that's obviously not able to do that [C15]</i></p> <p><i>Obviously, if it was a more physical session, if it was a practical session, that's not going to work particularly well; it's not going to work very well on Skype [C12]</i></p>                                                             |
| Psychological status   | The psychological status of the patient and the impact of this on care across different delivery formats.            | <p><i>One of the reasons why the screens would be good is I would feel less anxious to talk to someone through a screen, but I would in the same room [P9]</i></p> <p><i>You don't like the way that your life's going to look because you know you're not going to be able to achieve all the things that you want to achieve [P17]</i></p> <p><i>Over the years I have done a lot of leg and knee exercises... especially immediately after surgery... I probably should keep them going but I have to say I haven't. [PP2]</i></p> | <p><i>It might also make them feel a bit less anxious about having to travel, having to worry if my therapist or whoever I'm coming to see makes me feel welcome or makes me feel comfortable... It might make them feel a bit more comfortable if they're in their own environment [C16]</i></p> <p><i>I think it's that how much do the patients value that just talking to someone in person, that relationship side of things and those sorts of things that maybe they might not feel so safe to do ... and also sometimes patients just want a hug [C1]</i></p>                          |
| Previous care          | Experience of previous care                                                                                          | <p><i>Yeah, I think you, for me, I feel like I've been able to build up more of a bond with them all because I've seen them in person, whereas if it had been over a screen or a phone, I don't think I would have had that [P5]</i></p> <p><i>So, I've had physio on and off for fibromyalgia and actually I've been able to connect with this much better because of the way it's delivered [P3]</i></p>                                                                                                                            | <p><i>I don't think you can give a one size fits all to people. Some men particularly they just want a number, they want a number, they want sets they want reps. They just want a very clear structure and some people just you have to go that way because they react better to it. They're more likely to be more adherent to exercise if they go that way. Other people it's just a case of listening to your body, see how you feel, see what you manage. Because if you push them too far or push too little you could - you're just going to end up failing them, I think [C14]</i></p> |
| Perceived requirements | The negotiated requirements of the session                                                                           | <p><i>We tend to come down to RNOH probably once every six months now just for a check-in... so that she can then check up on those joints and make sure that I don't need to change what I'm doing or we don't need to look into it and get things investigated with orthopaedics [P17]</i></p>                                                                                                                                                                                                                                      | <p><i>I think it also depends on the population. Not everyone has complex needs as well. I think if we have a routine primary knee replacement there's no reason why you can't get everything. If you have a flare referral you'd be fine to do a 30 minute, whereas if you have a revision who's had five surgeries, 30 minutes is probably not going to be enough, because there will be a lot of belief systems around that which probably need to be looked into. So, yes and no. It depends on what the patient group is [C7]</i></p>                                                     |

### Theme 3: Demand

Patients may face multiple and differing demands dependent on the choices they make regarding a VC or a F2F consultation. Demands include the care factors, social factors and the consequences of choice.

#### *(i) Care requirements*

The requirements of care are dependent on the clinical status of the patient. Patients may be required to complete complex exercise regimens or perform assessments. Some of these initiatives may benefit from optimal visualisation of movements. Some of these may require hands on facilitation. For others, manual therapy may be indicated. Preferences are likely to be mediated by what the healthcare professional believes and the consequence of choice will change the demands on patients. These changes may be burdensome depending on the patient's capacity.

#### *(ii) Social demands*

Some patients in this study reported a vast array of social demands that interfered with healthcare, such as caring for elderly relatives or young children. Often, these conflicting demands interfered with the patient's ability to attend their own appointments and rehabilitation. Patients who reported excessive social demands reported that in some circumstances VCs could be more favorable.

#### *(iii) Consequence of choice*

The use of virtual consultation equipment may require a new skill set. Patients might also need to obtain rehabilitation equipment and technology for VC. Patients who did not have the space and rehabilitation equipment available preferred to travel in for a F2F consultation. Patients that found the idea of interacting with their rehabilitation professional over a screen challenging were more likely to prefer F2F appointments whereas others did not see this as an issue. Overcoming the lack of physical contact and adapting assessments proved to be an issue for some. The lack of a suitable rehab environment was a concern to some healthcare professionals.

The demands faced by patients arose as a direct result of the situation in conjunction with the capacity to fulfil the demands. Patients who felt that VCs were less burdensome may have a preference towards VCs whereas those who find them more burdensome may have a preference towards F2F consultations.

Table 2c – Theme 3: Demand

| Factor                 | Description                                                    | Patients Accounts                                                                                                                                                                                                                                                                                                                                                                                                                                                                                                                                                                                                                                                                                                                                                                                                                                                                                                    | Healthcare Professionals Accounts                                                                                                                                                                                                                                                                                                                                                                                                                                                                                                                                                                                                                                                                                                                                                                                                                                                                  |
|------------------------|----------------------------------------------------------------|----------------------------------------------------------------------------------------------------------------------------------------------------------------------------------------------------------------------------------------------------------------------------------------------------------------------------------------------------------------------------------------------------------------------------------------------------------------------------------------------------------------------------------------------------------------------------------------------------------------------------------------------------------------------------------------------------------------------------------------------------------------------------------------------------------------------------------------------------------------------------------------------------------------------|----------------------------------------------------------------------------------------------------------------------------------------------------------------------------------------------------------------------------------------------------------------------------------------------------------------------------------------------------------------------------------------------------------------------------------------------------------------------------------------------------------------------------------------------------------------------------------------------------------------------------------------------------------------------------------------------------------------------------------------------------------------------------------------------------------------------------------------------------------------------------------------------------|
| Care requirements      | The requirements of care                                       | <p><i>It depends what you're asking them to - if it was - it depends. If it's something simple then, yes, that's a good idea. If it's something a bit more complicated they actually have to come and see it because it's more of a hands-on type of thing [P8]</i></p> <p><i>I suppose it's not so much the conversations but the physical things that you might have to do. It would be very difficult for them to work out - if you're talking physiotherapy - just how your joints were working. They couldn't really see what your back was doing or how your arm was working or whatever, and you can't - they need to feel. Physiotherapy's quite a hands on the body sort of thing [P4]</i></p> <p><i>It's ridiculous in the sense that appointments have almost become a full-time job for me. I'm really grateful, I've got a lovely team of people that know me very well and look after me [P10]</i></p> | <p><i>How many exercises can they realistically fit in their day? I'd rather they did one or two really well than five or six badly [C11]</i></p> <p><i>I guess if they've had no restrictions really at all, then to completely have those restrictions - and it can be quite debilitating because they're so used to being independent and not having to really rely on others [C4]</i></p> <p><i>we do often use our hands for some assessment in terms of feeling for muscle-activated patterns or guarding [C15]</i></p> <p><i>We do lay on our hands. It might well be around showing someone that they've become really hypersensitive. Touching them on an area of skin that is not at all uncomfortable and saying what does that feel like, does it feel like I'm poking, whatever, and then putting your hand on their back or something and then say how does that feel? [C10]</i></p> |
| Social demands         | The competing life demands that can interfere with healthcare. | <p><i>I think, because I'm not looking after my mum, my mum has gone into a care home now. At the moment I haven't a job. I'm not working. I'm at home, I'm just doing things at home. I still go to the care home and sort things out for mum and appointments and that [P2]</i></p>                                                                                                                                                                                                                                                                                                                                                                                                                                                                                                                                                                                                                                | <p><i>I think for some people things are muddling along and I probably should work on my routine, but I've got my kids, I've got my work - this takes priority and that's I think my role is trying to tease that out a bit more. So, what is your priority right now? [C12]</i></p> <p><i>Maybe this is where the overwhelmingness comes in because if you are not doing any of things you suddenly feel like you have to change your entire life to be able to manage if some of what we have said isn't said carefully [PC1]</i></p>                                                                                                                                                                                                                                                                                                                                                            |
| Consequences of choice | The impact of choice                                           | <p><i>For me, it's the equipment. I only live in a small - and it is small, isn't it - a small two-bedroom house. I would have nowhere to store the equipment... there's no option out there to rent equipment [P19]</i></p> <p><i>Some of the stuff he doesn't need to touch me for, like when he's watching me do a squat. Are my knees going the right way? Yeah. He can do that over a FaceTime. That's absolutely fine. But as you say, he needs to - if he wants to check my strength physically, then yeah, I need to be here. It only limits that [P14]</i></p>                                                                                                                                                                                                                                                                                                                                              | <p><i>You might subconsciously use that [travel time] in a beneficial way... If you are straight in on a computer screen maybe there is some prep time that is not build in to the process as easily and you have to be mindful of preparing yourself beforehand [PC1]</i></p> <p><i>If you think about the patient that is actually sent into a flare-up from the journey that they've made... [C8]</i></p> <p><i>So often if they want to try and demonstrate exercises, a common feedback is the fact that their bed's too hard or too soft and it doesn't work, and the plinths are easier to do it [C1]</i></p>                                                                                                                                                                                                                                                                               |

#### Theme 4: Capacity

*Capacity* is the patient's ability to allocate resources to care. These resources are financial, infrastructural, social and healthcare related.

(i) *Financial*

Patients found that the demands of travel to a physical appointment can be costly, particularly when this entailed long journeys by public transport. Some patients were required to take unpaid leave from employment or risk losing their job. Some patients had supportive employers or did not feel significantly impacted through the cost of attendance. Healthcare professionals were aware of these these financial challenges faced by patients.

(ii) *Infrastructure*

Patients needed to have access to the hardware and software in order to use VC as a form of consultation. There was a requirement to understand how to use the technology in order to undergo a successful VC. Variations of hardware and software exist. There did not appear to be any relationship with type of hardware and software combination and preference. Some devices with larger screens were thought to be more beneficial and influence *expectations*. In addition, patients needed to have access to a suitable environment and equipment in order to undergo virtual rehabilitation.

(iii) *Social capacity*

Patients who had a support network available to them found this was a useful resource. Family members were able to assist with the logistics of travel to appointments, activities routines at home and motivation to engage with rehabilitation programmes. Healthcare professionals reported ways in which patients could enhance capacity through their social networks.

(iv) *Healthcare system*

The healthcare system can provide capacity. For example, some patients received hospital funded transport making attendance at the hospital easier. Healthcare professionals are skilled at facilitating motivation and behavior change which could improve capacity. Expectations of success may provide patients with additional motivation and self-efficacy to achieve the demands required of them.

Capacity is an important mediator of preference as it dictates whether or not a patient has the available resources to meet the demands of the situation and the expectations. Capacity is a mediator between the types of influences at work and has a direct influence on preference (See Figure 2).

Table 2d – Theme 4: Capacity

| Factor            | Description                                    | Patients Accounts                                                                                                                                                                                                                                                                                                                                                                                                                                                                                                                                                                                                                                                                                                                  | Healthcare Professionals Accounts                                                                                                                                                                                                                                                                                                                                                                                                                                                                                                                                                                                                                                                                             |
|-------------------|------------------------------------------------|------------------------------------------------------------------------------------------------------------------------------------------------------------------------------------------------------------------------------------------------------------------------------------------------------------------------------------------------------------------------------------------------------------------------------------------------------------------------------------------------------------------------------------------------------------------------------------------------------------------------------------------------------------------------------------------------------------------------------------|---------------------------------------------------------------------------------------------------------------------------------------------------------------------------------------------------------------------------------------------------------------------------------------------------------------------------------------------------------------------------------------------------------------------------------------------------------------------------------------------------------------------------------------------------------------------------------------------------------------------------------------------------------------------------------------------------------------|
| Financial         | The ability to free up financial resources     | <p><i>So obviously taking an afternoon off as annual leave or whatever wouldn't result in a disciplinary, but then in the long-run I have to think... [P5]</i></p> <p><i>If you're doing it once a week or something, you're spacing it out... it's travelling there. That would be - it's expensive to travel up here because it's not exactly in the closest of areas, it's in the middle of nowhere [P7]</i></p>                                                                                                                                                                                                                                                                                                                | <p><i>They might have a bit more support but again they've then got to think about to do - if they're paying for it privately there's the added cost to them [C4]</i></p> <p><i>When I think about some of these patients that come like three hours on public transport - what a waste of money that is. I think of patients that come all the way from Birmingham and Brighton. That doesn't make any sense to me, and actually at times I have said I think we should do this on the phone [C17]</i></p>                                                                                                                                                                                                   |
| Infrastructure    | Access to material and informational resources | <p><i>You could get a stand and you'd be able to see everything really. If you put it on a table, if you need to sit on a chair. You could pull it a bit away from you so they can see you. I reckon definitely it would work [P7]</i></p> <p><i>I would either Skype on my laptop or Skype on my thing, and if I could transfer to the TV, you know? I've got a smart TV, it could be done that way. Because if you've got a bigger picture you could see more, you could do more, whereas if you've got a little screen your vision is very limited to a little square [P8]</i></p>                                                                                                                                              | <p><i>If you haven't got a laptop and Skype at home, then you're probably not going to be that techy, that tech savvy, and that open to learning how to use a tablet that you've never used before or something, probably [C19]</i></p> <p><i>They would need access to the technology... do they have the internet, do they have a connection, do they have a smart device, do they have a way that they can use that and are they familiar with their platform... a prime example is SKYPE. iPhone users tend to use Facetime so do they have a SKYPE account, are they able to set it up? I think it's that accessibility, and it's have they used it before which is a big thing... [PC2]</i></p>         |
| Social capacity   | Support available through social network       | <p><i>I have a husband who does lots of stuff for me... I can't do housework because I can't lift an iron anymore [P4]</i></p> <p><i>Without that group, I think I would just be in bits right now to be honest. [P14]</i></p>                                                                                                                                                                                                                                                                                                                                                                                                                                                                                                     | <p><i>This lady, who I was talking about just before, she lived by herself and she hasn't got any carers but the family was helping [C2]</i></p> <p><i>More patients are having their family members helping them with these things at home and that visit regularly. There's no reason why that can't be - if they're turning up to help them put on TED stockings, then I'm sure they can help them turn on a tablet and watch something [C5]</i></p>                                                                                                                                                                                                                                                       |
| Healthcare system | Sources of healthcare capacity                 | <p><i>I think it's emotional support as well. I suppose in my case because I've had so many mental issues attached to my disorder, I have found support here from an orthopaedic point of view. When I had a setback and I was told there was a potential another infection in my bone I went to pieces here, and I saw [anonymised]. He was so reassuring... I know I've got security because I feel [anonymised] knows my case so well, and he knows what happened [P10]</i></p> <p><i>it's difficult for me, I can't use the underground or anything like that so I use the patient transport and they fetch me... some of those appointments have been 10 minutes or so and I have used the patient transport... [PP2]</i></p> | <p><i>But the skill then is to watch your language and rather than tell someone how easy it is, or tell someone the solution, again that's where motivational interviewing comes in. Rather than saying but you can just pace, let's work out how you can pace, say something like is there anything that you've been learning that you feel could give some boundaries there or anything you've tried? So again, you're getting the person to solve their own problems [C13]</i></p> <p><i>Sometimes the hospital transports are not quite helpful for them. They don't come on time, so they delay sometimes. She ends up missing her appointment because of a delay in the hospital transport [C2]</i></p> |



## Discussion

This paper outlines four key factors and describes mechanisms that influence patient preferences in the context of VC for orthopaedic rehabilitation. These factors, empirically derived the study, were constructed from an abductive analysis. These factors have been identified and characterised, and can be mapped as an explanatory model that demonstrates the interplay between factors and how they interact to influence preferences.

Figure 2: model to illustrate interactions between mechanisms that influence preference for virtual consultations

### (a) The relationship between *Situation* and *Expectations*

The situation informs the patient's expectations of care. If the situation demands F2F (or VC) the patient will be required to decide whether F2F (or VC) would be the most suitable alternative based on the care they expect to receive. These expectations influences the situation of care for the patient.

### (b) The relationship between *Situation* and *Demand*

The situation requires the patient to perform specific tasks to engage in their care. These demands will fluctuate as the clinical status and the treatment requirements fluctuate. The availability of the care pathway may remain fixed or fluid dependent on the specific situation. Resources available through capacity will dictate the demands of the situation. Competing demands on the patient may reduce available capacity to complete the demands of care dictated by the situation. The demands on the patient, and their interaction with the patient's capacity in turn influences the situation.

### (c) The relationship between *Situation* and *Capacity*

Patient capacity influences patient expectations directly via the demands and expectations of care. In addition; the capacity of the patient to engage with care itself can influence the situation as resources may be allocated to the patient by the healthcare provider depending on a need's basis, for example, whether a patient qualifies for hospital funded transport. The situation is firmly established once an equilibrium is reached between the situation and capacity. The capacity of the patient to engage with care is therefore directly dependent on the situation.

### (d) The consequences of *Preference*

The preferred choice between a F2F and a VC has consequences. The consequences of choice directly impact on the demands of the patient and their expectations of care. Changes in expectations and demand in turn influence the patient's capacity and the situation.

### (e) The formation of *Preference*

The formation of preference, within this study, was the resulting process of complex factors interacting with one another. The establishment of the situation and capacity dictate the expectations and demands of care. Preferences are established following a total (considering the

options available) subjective comparative (these options are compared based on the patient's experience) evaluation (the option with the most utility is selected).

A total subjective comparative evaluation is a cognitively demanding task<sup>12</sup>. We have found, from this research that multiple factors are at play that combine and compete. To ask sensitising questions in relation to these factors may facilitate the cognitively demanding task of preference formation. These results can therefore be applied to clinical care in the form of practical questions for clinicians to ask patients to support formation of preferences for or against F2F (or VC). These questions are demonstrated in table 3 and are suitably generic; they can be applied across all areas of healthcare as they are not limited to orthopaedic rehabilitation.

**Table 3: Practical questions to support formation of preference**

| Theme        | Factor                 | Description                                                                                                                                        | Practical questions to support identification of preference                                                                                                                                                 |
|--------------|------------------------|----------------------------------------------------------------------------------------------------------------------------------------------------|-------------------------------------------------------------------------------------------------------------------------------------------------------------------------------------------------------------|
| Situation    | Clinical status        | The healthcare complaint the patient experiences, its stability, reversibility and its impact on the patient in conjunction with other complaints. | <ul style="list-style-type: none"> <li>Does your problem require you to be seen in person?</li> <li>Would having a VC make things easier for you?</li> </ul>                                                |
|              | Treatment requirements | The treatment and management of the complaint that is required. The restrictions imposed on the patient.                                           | <ul style="list-style-type: none"> <li>Can the treatment you require be delivered virtually?</li> </ul>                                                                                                     |
|              | Care Pathway           | The availability of healthcare to the patient                                                                                                      | <ul style="list-style-type: none"> <li>What can we do to support you with a F2F or VC?</li> </ul>                                                                                                           |
| Expectations | Desire for contact     | Whether the patient / healthcare professional believes the F2F is more of a capable method of care delivery than VC.                               | <ul style="list-style-type: none"> <li>Do you think your issue could be best managed by F2F / VC?</li> <li>Does your healthcare professional think your issue could be best managed by F2F / VC?</li> </ul> |
|              | Psychological status   | The psychological status of the patient and the impact of this on care across different delivery formats.                                          | <ul style="list-style-type: none"> <li>How would using VC affect you?</li> <li>Would you be comfortable seeing yourself on a screen?</li> </ul>                                                             |
|              | Previous care          | Experience of previous care                                                                                                                        | <ul style="list-style-type: none"> <li>How could your previous care have been successfully managed using F2F / VC?</li> </ul>                                                                               |
|              | Perceived requirements | The negotiated requirements of the session                                                                                                         | <ul style="list-style-type: none"> <li>What do you require from your healthcare professional during your session?</li> <li>Can this be achieved by F2F / VC?</li> </ul>                                     |
| Demand       | Care requirements      | The requirements of care                                                                                                                           | <ul style="list-style-type: none"> <li>What does your care require you to do?</li> <li>Can you achieve this?</li> </ul>                                                                                     |

|          |                        |                                                                |                                                                                                                                                           |
|----------|------------------------|----------------------------------------------------------------|-----------------------------------------------------------------------------------------------------------------------------------------------------------|
|          | Social demands         | The competing life demands that can interfere with healthcare. | <ul style="list-style-type: none"> <li>What other things do you need to do that might get in the way of a F2F / VC?</li> </ul>                            |
|          | Consequences of choice | The impact of choice                                           | <ul style="list-style-type: none"> <li>What would you have to do if you chose a F2F / VC?</li> </ul>                                                      |
| Capacity | Financial              | The ability to free up financial resources                     | <ul style="list-style-type: none"> <li>What would the financial impact be for you if you chose a F2F / VC?</li> </ul>                                     |
|          | Infrastructure         | Access to material and informational resources                 | <ul style="list-style-type: none"> <li>Do you have access to what you need to have a F2F / VC?</li> <li>Do you understand how to manage these?</li> </ul> |
|          | Social capacity        | Support available through social network                       | <ul style="list-style-type: none"> <li>Do you have anyone who could support you with a F2F / VC?</li> </ul>                                               |
|          | Healthcare system      | Sources of healthcare capacity                                 | <ul style="list-style-type: none"> <li>How can your healthcare professionals support you to access your care?</li> </ul>                                  |

F2F – face to face consultation; VC – virtual consultation

### Results in context

Burden of treatment theory<sup>24</sup> and the cumulative complexity model<sup>19</sup> both focus on the relationship between the workload demands on the patient with the patients capacity to do the work. Our previous research<sup>25</sup> hypothesised that the work of being a patient influences preference; patients may prefer the least burdensome option when giving the choice between a F2F and VC.

This current paper refines our previous model of patient preferences adding in: the patient's expectations of care (see Figure 2). Some patients find the process of F2F attendance burdensome. Despite this, some of these patients preferred to receive hands on manipulation. Some patients were prepared to tolerate burden as part of a process that offered them F2F care they believed was superior to a VC. In addition, some patients perceived the consequences of choosing a F2F (or VC) would significantly impact on their overall experience of care, both positive or negative. Additionally, factors such as confidentiality in VC and trustworthiness<sup>28</sup> may influence expectations of care. The model within this paper clearly demonstrates additional factors relating to BoT are likely to influence their preference. The option that best meets patients' expectations of care influences preferences.

Some patients discussed the situational nature of their problem and how their preferences may have been different under different circumstances. This is in accord with our qualitative study of acceptability for rehabilitation consultations<sup>14</sup>. Greenhalgh et al<sup>10</sup> found that videoconferencing using SKYPE was useful to access hard to reach patients and that avoiding long journeys to access care was beneficial. Not travelling can reduce healthcare costs<sup>29</sup> and the need for family to accompany patients on their journey<sup>14</sup>. Patients without the support of their families in our study

1  
2  
3 found this to be beneficial. Kaambwa et al<sup>13</sup> found that patients had strong preferences for VCs  
4 when their clinic was between 15-100km away and when their use reduced costs. The dynamics  
5 between the situation and the patient's capacity for care create a unique state of affairs for each  
6 patient at the time of being offered the choice between consultations. These factors directly  
7 influence the patients burden and expectations of care. Consideration of these factors, and  
8 identification of the option with the most utility to the patient, will influence preferences.  
9

10  
11 This study is separated from many others (e.g. in primary care<sup>30</sup> and psychiatry<sup>31</sup> studies) because  
12 orthopaedic rehabilitation often requires 'hands on' care which is not possible virtually. The lack  
13 of touch over VC can inhibit patients experience of receiving care, particularly when they desire it  
14 <sup>32</sup>. Patients in the PhysioDirect study of telephone consultations still wanted to have 'proper' F2F  
15 physio <sup>33</sup>. VC has been seen as 'impersonal' <sup>34</sup> and can reduce emotional bonding between the  
16 patient and healthcare professional <sup>32</sup>.  
17  
18

19  
20 A common theme in our data was the negative psychological impact some patients felt seeing  
21 themselves through a screen. This was in accord with a patient in the Jansen-Kasterink study <sup>34</sup>  
22 who reported: *'I cannot imagine seeing myself on video, I already have trouble seeing myself in a*  
23 *picture'*. Some patients for whom this was not a problem, however, found that being in their own  
24 environment and avoiding travel made them feel more relaxed <sup>10</sup> which could in itself improve  
25 patient-healthcare professional relationships.  
26  
27

28  
29 If offered the choice of a F2F or VC, patients need to give consideration to the alternatives; the  
30 actions, the state of affairs and the consequences of choosing each alternative. The present  
31 research does not suggest how *much* the highlighted factors influences preferences or compete  
32 and compete with each other. This study will inform the design of a Discrete Choice Experiment, a  
33 deductive investigation to quantitatively measure how each factor influences preferences for  
34 patients in a pragmatic real-world scenario. A thorough understanding of the effect and influence  
35 of preferences will enable patient-centered service design.  
36  
37

38  
39 However, the results of this study should be interpreted in light of their limitations. It was  
40 conducted at a single center and may not translate to other clinical areas. To overcome this,  
41 variation across participants was sought and attention focused towards more general factors to  
42 allow for transportability to other clinical settings. . The lead researcher (AG) is a healthcare  
43 professional within the centre which could have led to bias results through local familiarity. To  
44 limit this, patients who had a previous existing relationship with AWG were excluded from the  
45 study as per the exclusion criteria. It was not possible, however, to exclude clinical staff, most of  
46 whom were known to AG. This was taken into account in the data analysis through a process of  
47 defamiliarisation; attributions for each data point were orientated into a taxonomy to facilitate  
48 model development. Raw interview data was used to illustrate the model.  
49  
50

#### 51 Potential impact of Covid-19 pandemic on the future of virtual consultations

52

53  
54 The empirical data collection for this research was conducted prior to the COVID-19 pandemic.  
55 The COVID-19 pandemic has accelerated the introduction of VC across healthcare. The rapid  
56 implementation of VC<sup>9</sup> may shape the future of this work in a way that was not previously  
57 anticipated. The COVID-19 'situation' has influenced an increased uptake of VC in practice. Whilst  
58 this research did not formally collect data regarding previous experience of VC (even in a different  
59  
60

1  
2  
3 setting), future research should explore patient and clinician experience of using VC for healthcare  
4 consultations. Further research evaluating the use of VC during the COVID-19 pandemic will  
5 support future service redesign.  
6  
7

## 8 9 Conclusions

10 We conducted 44 qualitative interviews to gain a thorough understanding of the mechanisms that  
11 influence patient preference. Multiple factors were identified: the situation (the ways that  
12 patients understand and explain their clinical status, their treatment requirements, and the care  
13 pathway), the expectations of care (influenced by a patients desire for contact, psychological  
14 status, previous care and perceived requirements), the demand (of care, of each patients  
15 respective social situation and the consequences of choice) and the capacity (the patient's ability  
16 to allocate resources to care; these include financial, infrastructural, social and healthcare  
17 resources). Factors may combine or compete with each other to influence preference. The  
18 patient's situation is dynamic and therefore preferences must also be dynamic. The formation of  
19 preference is cognitively demanding and sensitising questions may support patients to identify  
20 their preferred consultation format. This research illuminates the factors that appear to influence  
21 preference for patients. This is important for healthcare professionals; an understanding of  
22 preferences is essential to support the design of patient care pathways incorporating virtual  
23 consultations. The dynamic model presented here can be used to inform quantitative studies such  
24 as discrete choice experiments, and could act as a programme theory to inform future trials.  
25  
26  
27  
28  
29  
30  
31  
32  
33  
34

35 **4177 excl tables**  
36  
37  
38  
39  
40  
41  
42  
43  
44  
45  
46  
47  
48  
49  
50  
51  
52  
53  
54  
55  
56  
57  
58  
59  
60

## Abbreviations

BoT – Burden of Treatment Theory

CONNECT (Project) – Care in Orthopaedics, burdeN of treatmeNt and the Effect of Communication Technology

F2F – face-to-face care

VC – virtual consultation

## Declarations

### Ethics approval and consent to participate

Ethical approval was received for this study (Approval received 4<sup>th</sup> December 2018 from the South Central-Oxford C Research Ethics Committee [IRAS ID: 255172, REC Reference 18/SC/0663]). All participants were provided with a participant information sheet and given at least 24 hours to consider the information and ask questions before being recruited into the study. All participants provided informed, written consent prior to enrolment.

### Availability of data and materials

The datasets used and/or analysed during the current study are available from the corresponding author on reasonable request.

### Competing interests

None to declare

### Funding

Anthony Gilbert is funded by a National Institute for Health Research (NIHR), Clinical Doctoral Research Fellowship for this research project (ICA-CDRF-2017-03-025).

### Patient and Public Involvement

The CONNECT Project Patient and Public Involvement steering group (PPISG) has been set up to provide guidance on the conduct of the research (details available from [www.theconnectproject.info](http://www.theconnectproject.info)). The first meeting of the PPISG was held in August 2016 prior to the submission of the research to the National Institute for Health Research in May 2017. A discussion was held about the overall research aims which supported the identification of the research questions. The PPISG has supported the design of the overall research plan and will continue to be involved during the development and refinement of each phase prior to the completion of each study protocol. The participant information and consent forms and the discussion guide for this research was reviewed by the PPISG. In addition, the PPISG will support the development of the lay summary outputs to be disseminated to patients and the public.

## Authors' contributions

AWG wrote the paper and conceived the project with CRM, JJ and MS. CRM guided qualitative data collection. AWG conducted all the interviews. CRM assisted with data analysis, and with AWG developed the model. CRM, JJ and MS edited and critically revised the paper. All authors have read and approved the manuscript. AWG is the guarantor of the manuscript.

## Acknowledgements

The authors thank members of the CONNECT Project Patient and Public Involvement steering group for their invaluable contributions to the overall study design of the CONNECT Project and obtaining funding for the PhD Fellowship. The authors also thank John Doyle, Anju Jaggi, Iva Hauptmannova and colleagues within the Therapies Directorate and Research and Innovation Centre at the Royal National Orthopaedic Hospital for their ongoing support. The authors are grateful to the patients and members of staff who participated in this study.

## References

1. Health BCMo. Primary and Community Care in BC: A Strategic Policy Framework 2015 [Available from: <https://www.health.gov.bc.ca/library/publications/year/2015/primary-and-community-care-policy-paper.pdf> accessed 28th February 2020 2020.
2. Australia GUT. Financial Incentives for Telehealth Canberra, AU2012 [Available from: [https://gp2u.com.au/static/documents/Telehealth\\_Program\\_Guidelines\\_effective\\_1\\_July\\_2012.pdf](https://gp2u.com.au/static/documents/Telehealth_Program_Guidelines_effective_1_July_2012.pdf) accessed 28th February 2020.
3. NHS. The NHS Long Term Plan. In: Health Do, ed. Online, 2019.
4. Garber S, Gates SM, Keeler EB, et al. Redirecting Innovation in U.S. Health Care: Options to Decrease Spending and Increase Value. *Rand Health Quarterly* 2014;4(1):3-3.
5. Mahendradhata Y, Trisnantoro L, Listyadewi S, et al. The Republic of Indonesia health system review: Health Systems in Transition; 2017  
[<https://apps.who.int/iris/bitstream/handle/10665/254716/9789290225164-eng.pdf;sequence=1>]. Available from: <https://apps.who.int/iris/bitstream/handle/10665/254716/9789290225164-eng.pdf> accessed 16th December 2019.
6. Armfield NR, Bradford M, Bradford NK. The clinical use of Skype—For which patients, with which problems and in which settings? A snapshot review of the literature. *International Journal of Medical Informatics* 2015;84(10):737-42. doi: 10.1016/j.ijmedinf.2015.06.006
7. Greenhalgh T, Koh GCH, Car J. Covid-19: a remote assessment in primary care. *BMJ (Clinical research ed)* 2020;368:m1182. doi: 10.1136/bmj.m1182
8. Greenhalgh T, Wherton J, Shaw S, et al. Video consultations for covid-19. *BMJ (Clinical research ed)* 2020;368:m998. doi: 10.1136/bmj.m998
9. Gilbert A, Billany J, Adam R, et al. Rapid implementation of virtual clinics due to COVID-19: Report and early evaluation of a Quality Improvement initiative. *BMJ Open Quality* 2020;[Accepted ahead of print]
10. Greenhalgh T, Shaw S, Vijayaraghavan S, et al. Real-world implementation of video outpatient consultations at macro, meso, and micro levels: Mixed-method study. *Journal of Medical Internet Research* 2018;20(4) doi: 10.2196/jmir.9897
11. Mair F, May C, O'Donnell C, et al. Factors that promote or inhibit the implementation of e-health systems: an explanatory systematic review. *Bulletin of the World Health Organization* 2012;90:357-64. doi: doi: 10.2471/BLT.11.099424
12. Hausman DM. Preference, Value, Choice, and Welfare: Cambridge University Press 2012.
13. Kaambwa B, Ratcliffe J, Shulver W, et al. Investigating the preferences of older people for telehealth as a new model of health care service delivery: A discrete choice experiment. *Journal of Telemedicine and Telecare* 2016;23(2):301-13. doi: 10.1177/1357633X16637725
14. Gilbert AW, Jaggi A, May CR. What is the acceptability of real time 1:1 videoconferencing between clinicians and patients for a follow-up consultation for multi-directional shoulder instability? *Shoulder & Elbow* 2019;11(1):53-59. doi: 10.1177/1758573218796815
15. Gilbert A, Jones J, May C. Use of virtual consultations in an orthopaedic rehabilitation setting: how do changes in the work of being a patient influence patient preferences? A systematic review and qualitative synthesis. *BMJ Open* 2020;10:e036197. doi: 10.1136/bmjopen-2019-036197
16. Gilbert AW, Jaggi A, May CR. What is the patient acceptability of real time 1:1 videoconferencing in an orthopaedics setting? A systematic review. *Physiotherapy (United Kingdom)* 2018;104(2):178-86. doi: 10.1016/j.physio.2017.11.217
17. Lippiett KA, Richardson A, Myall M, et al. Patients and informal caregivers' experiences of burden of treatment in lung cancer and chronic obstructive pulmonary disease (COPD): a systematic review and synthesis of qualitative research. *BMJ Open* 2019;9(2):e020515-e15. doi: 10.1136/bmjopen-2017-020515
18. Gallacher K, I., May C, R., Langhorne P, et al. A conceptual model of treatment burden and patient capacity in stroke. *BMC Family Practice* 2018(19):9. doi: 10.1186/s12875-017-0691-4



19. Shippee ND, Allen SV, Leppin AL, et al. Attaining minimally disruptive medicine: Context, challenges and a roadmap for implementation. *Journal of the Royal College of Physicians of Edinburgh* 2015;45(2):118-22. doi: 10.4997/JRCPE.2015.206
20. Wall PDH, Sprowson AP, Parsons N, et al. Protocol for a single-centre randomised controlled trial of multimodal periarticular anaesthetic infiltration versus single-agent femoral nerve blockade as analgesia for total knee arthroplasty: Perioperative Analgesia for Knee Arthroplasty (PAKA). *BMJ Open* 2015;5(12):e009898-e98. doi: 10.1136/bmjopen-2015-009898
21. May C. Towards a general theory of implementation. *Implementation Science* 2013;8(1) doi: 10.1186/1748-5908-8-18
22. May C, Montori VM, Mair FS. We need minimally disruptive medicine. *BMJ: British Medical Journal* 2009;339(7719):485.
23. Gilbert A, Jones J, Stokes M, et al. Protocol for the CONNECT Project: a mixed methods study investigating patient preferences for communication technology use in orthopaedic rehabilitation consultations. *BMJ Open* 2019;9(12):e035210. doi: 10.1136/bmjopen-2019-035210
24. May CR, Hunt K, May CM, et al. Rethinking the patient: Using Burden of Treatment Theory to understand the changing dynamics of illness. *BMC Health Services Research* 2014;14(1) doi: 10.1186/1472-6963-14-281
25. Gilbert A, Jones J, May C. Use of virtual consultations in an orthopaedic rehabilitation setting: how do changes in the work of being a patient influence patient preferences? A systematic review and qualitative synthesis. *BMJ Open* 2020; 10:e036197. doi: 10.1136/bmjopen-2019-036197
26. Tavory I, Timmermans S. *Abductive Analysis: Theorizing Qualitative Research*. Chicago and London: University of Chicago Press 2014.
27. O'Brien BC, Harris IB, Beckman TJ, et al. Standards for reporting qualitative research: A synthesis of recommendations. *Academic Medicine* 2014;89(9):1245-51. doi: 10.1097/ACM.0000000000000388
28. Mark AH, Elizabeth D, Beiyao Z, et al. Trust in Physicians and Medical Institutions: What Is It, Can It Be Measured, and Does It Matter? *The Milbank Quarterly* 2001;79(4):613.
29. Powell RE, Henstenburg JM, Cooper G, et al. Patient perceptions of telehealth primary care video visits. *Annals of Family Medicine* 2017;15(3):225-29. doi: 10.1370/afm.2095
30. Donaghy E, Hammersley V, Bikker A, et al. Acceptability, benefits, and challenges of video consulting: A qualitative study in primary care. *British Journal of General Practice* 2019;69(686):E586-E94. doi: 10.3399/bjgp19X704141
31. Wynn R, Bergvik S, Pettersen G, et al. Clinicians' experiences with videoconferencing in psychiatry. *Studies in health technology and informatics* 2012;180:1218-20.
32. Cranen K, Drossaert CHC, Brinkman ES, et al. An exploration of chronic pain patients' perceptions of home telerehabilitation services. *Health Expectations* 2012;15(4):339-50. doi: 10.1111/j.1369-7625.2011.00668.x
33. Pearson J, Richardson J, Calnan M, et al. The acceptability to patients of PhysioDirect telephone assessment and advice services; a qualitative interview study, 2016.
34. Jansen-Kosterink S, In 't Veld RH, Hermens H, et al. A Telemedicine Service as Partial Replacement of Face-to-Face Physical Rehabilitation: The Relevance of Use. *Telemedicine Journal And E-Health: The Official Journal Of The American Telemedicine Association* 2015;21(10):808-13. doi: 10.1089/tmj.2014.0173

Figure 1: flow diagram of methods

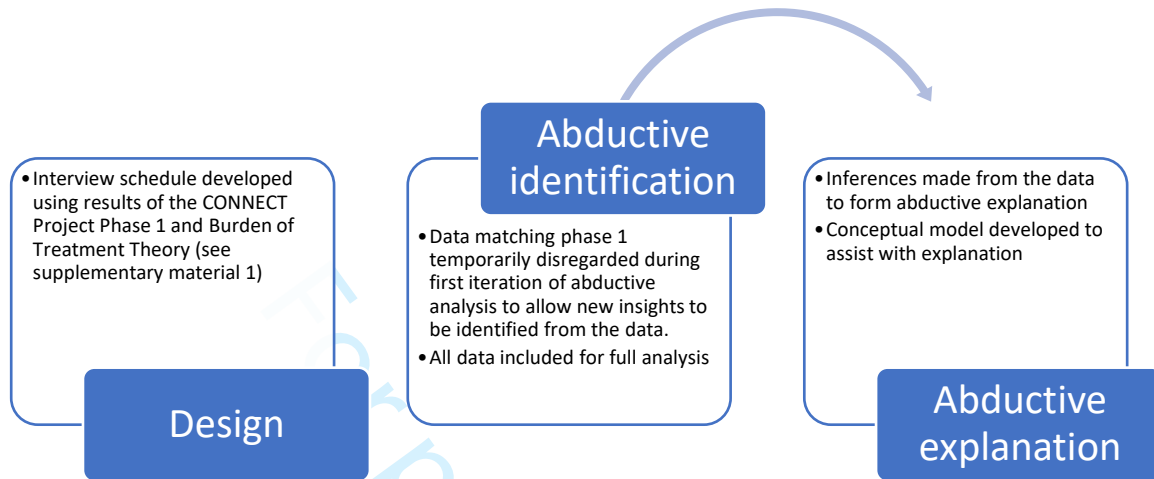

Figure 2: model to illustrate interactions between mechanisms that influence preference for virtual consultations

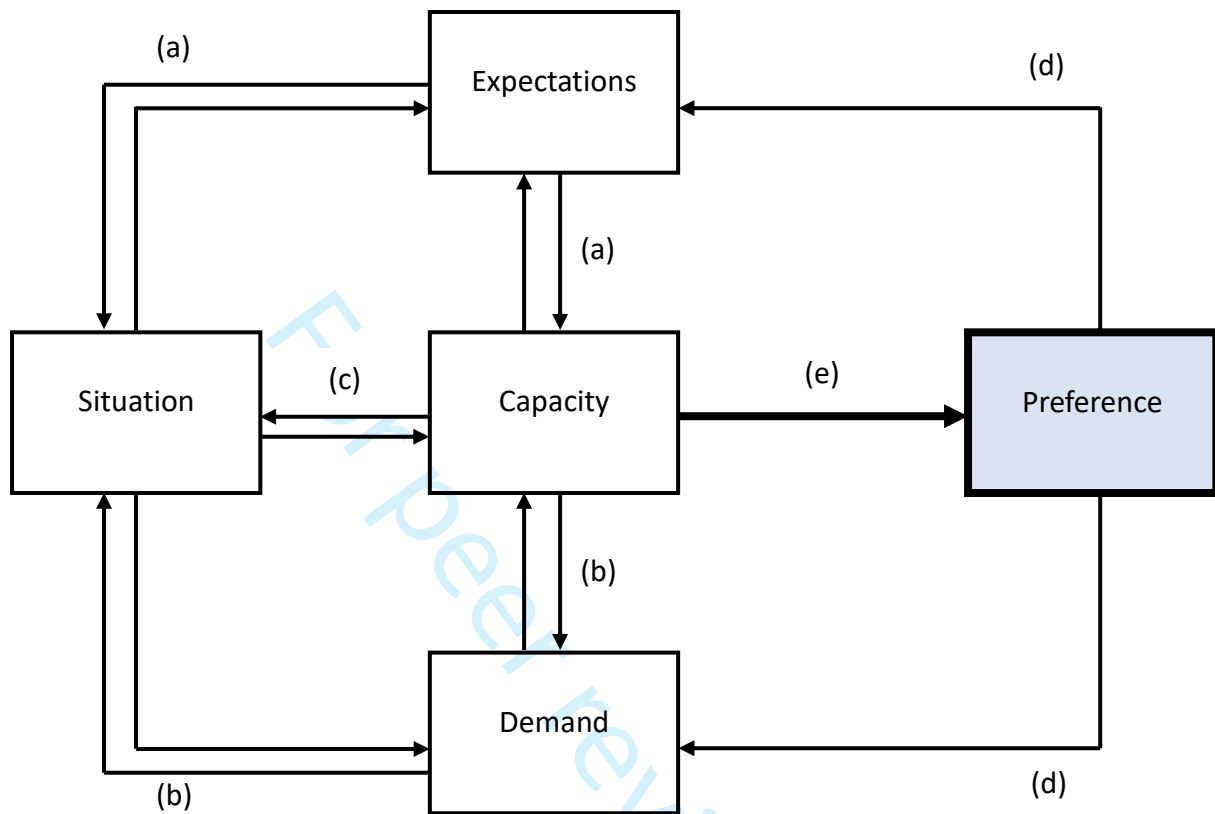

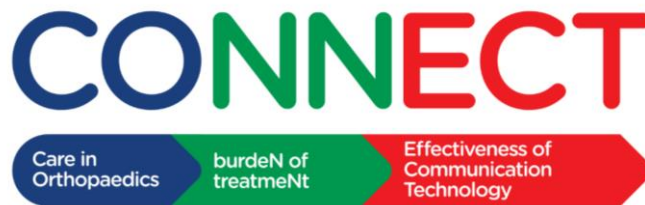

## CONNECT Project Topic Guide

### Part 1 – Burden of Treatment

- **Impact on Patient:** how technology consultations influence the experience of living with illness and engagement with clinical care

What was life like before you got your condition?

How does your condition affect you with daily life?

- Family
- Friends
- Work
- Hobbies
- Day to day activities and routine

Does anyone support you to manage your condition?

How do you manage your condition?

- Routine stuff
- Managing exacerbations

What medical services do you interact with, what for?

- Regularity?

How would using communication technology impact on how you manage your condition?

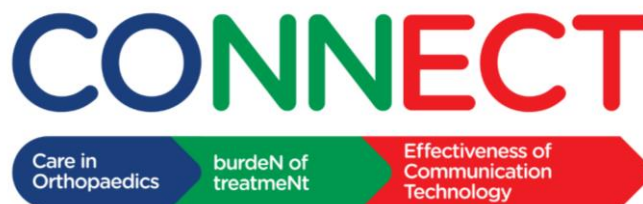

## Part 2 – Results of Phase 1

- **Skills:** what were needed, how were they gained, how were they enacted in practice.

*What skills do you think you would need in order to use Communication technology for your [physio / OT]? (Is there any difference between the two?)*

*Do you have the skills now? How would you get them? How could the RNOH support you to get them?*

*Describe how you think communication technology use would look in reality*

- **Clinical Interactions:** impact of technology consultations on clinical interactions

*What is the relationship like with you and your clinician now? Would it be different using communication technology? What could you still do? What couldn't you do? How would this make you feel?*

*How would it be with someone different? What would be 'a good person'. What would be a 'bad person'.*

- **Environment:** the location and resources required to engage with clinical rehabilitation

*What would you physically need to use communication technology? Where would you get it from? Where would you like to get it from (ie self-sourced or hospital sourced)*

*Where would you use it from? What space would you need to achieve the objectives of the consultation?*

- **Processes:** how technology consultations affect routine clinical practice

*What has your journey been as an RNOH patient (previous care, how they got referred, waiting time, experience of being a patient, dealing with other services?)*

*How would this change with using communication technology? Wat would be better? What would be worse?*

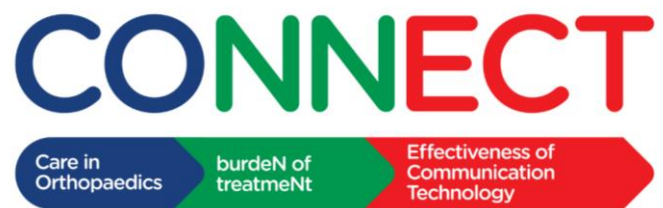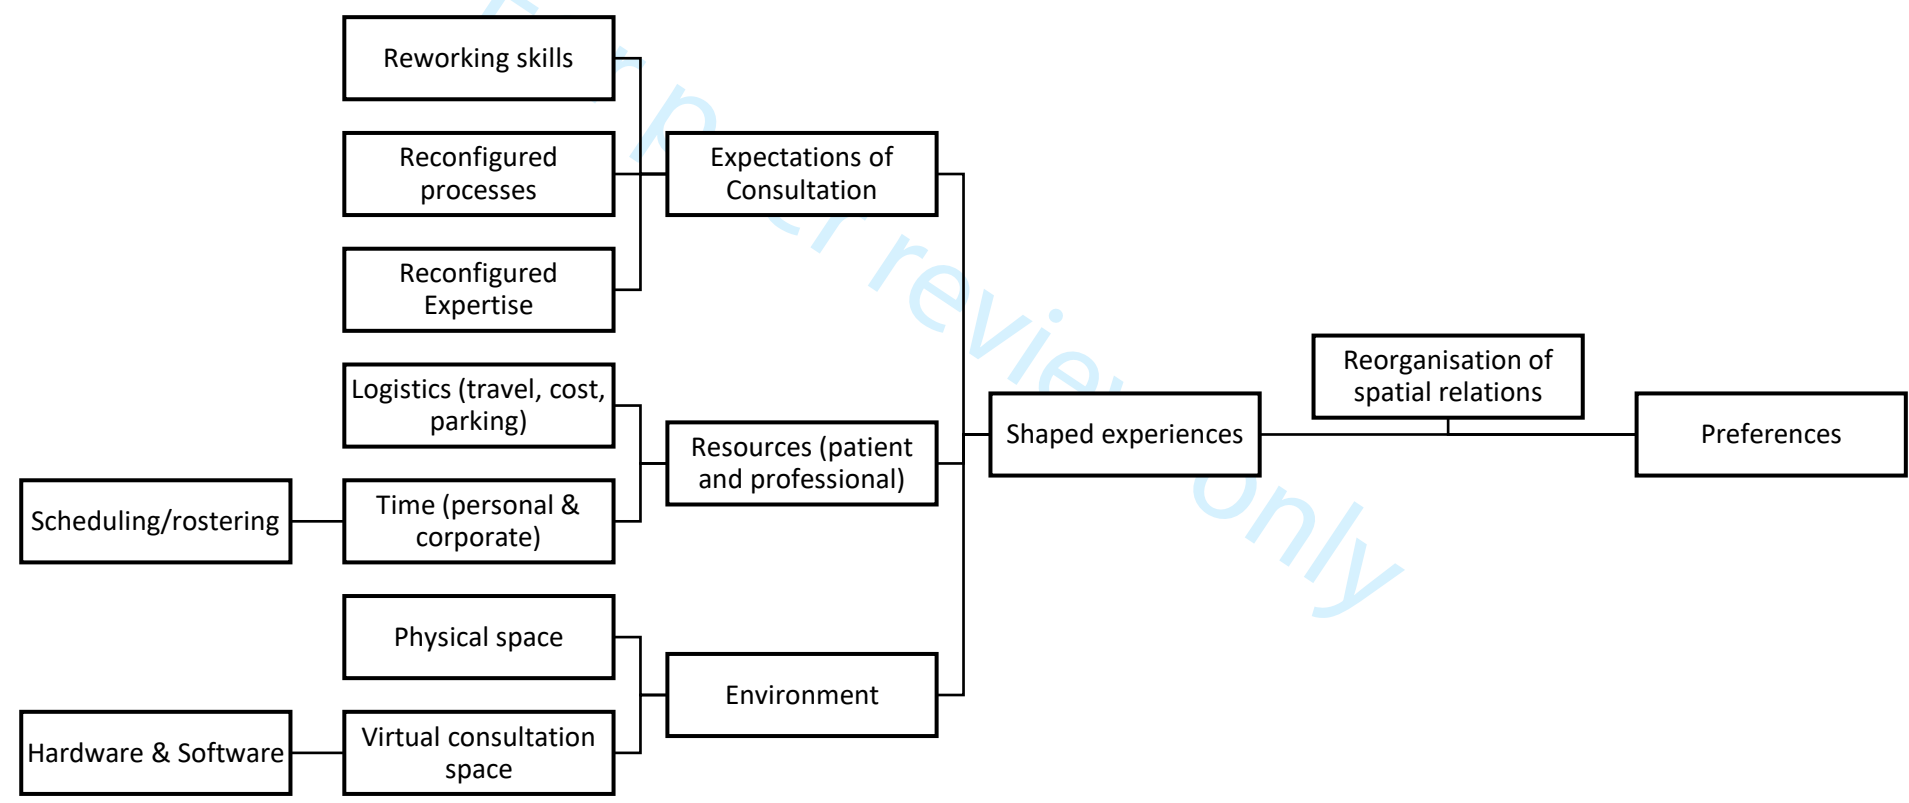

1  
2  
3  
4  
5  
6  
7  
8  
9  
10  
11  
12  
13  
14  
15  
16  
17  
18  
19  
20  
21  
22  
23  
24  
25  
26  
27  
28  
29  
30  
31  
32  
33  
34  
35  
36  
37  
38  
39  
40  
41  
42  
43  
44  
45  
46

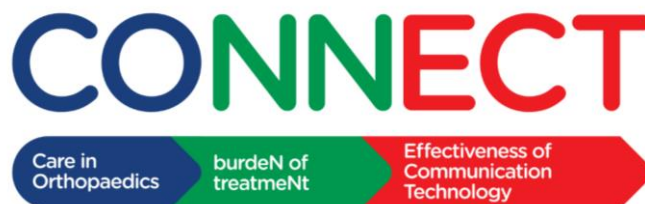

## Part 3 – DCE Design

- **Preferences:** the potential patients see for technology as an alternative to routine face to face care

In what situations would you be happy to use technology?

In what situations would you not be happy to use?

What would use look like for you at the RNOH?

What would we need to consider? From a personal perspective? From others' perspective?

Anything you would like to add that might help the research?

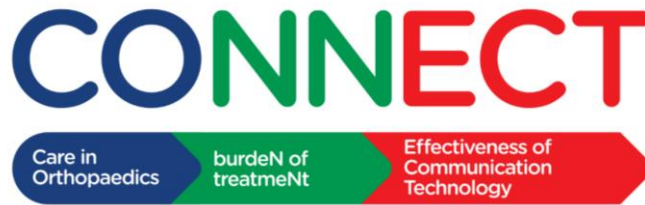

## CONNECT Project Topic Guide

### Part 1 – Burden of Treatment

- **Impact on Patient:** how technology consultations influence the experience of living with illness and engagement with clinical care

Can you give me examples of how patients' conditions affect their life? eg

- Family
- Friends
- Work
- Hobbies
- Day to day activities and routine

Do your patients need support to manage their condition?

How do patients manage their condition?

- Routine stuff
- Managing exacerbations

What medical services do your patients interact with, what for?

- Regularity?

How would using communication technology impact on how patients manage their conditions?





## Part 2 – Results of Phase 1

- **Skills:** what were needed, how were they gained, how were they enacted in practice.

*What skills do you think patients would need in order to use Communication technology for your [physio / OT]? (Is there any difference between the two?)*

*Do your patients have the skills now? How would they get them? How could the RNOH support them to get them?*

*Describe how you think communication technology use would look in reality*

- **Clinical Interactions:** impact of technology consultations on clinical interactions

*Would it be different using communication technology? What could you still do? What couldn't you do? How would this make your patients feel?*

*How would it be with someone different? What would be 'a good person'. What would be a 'bad person'.*

- **Environment:** the location and resources required to engage with clinical rehabilitation

*What would you physically need to use communication technology? Where would patients get it from? Where would they like to get it from (ie self-sourced or hospital sourced)*

*Where would they use it from? What space would they need to achieve the objectives of the consultation?*

- **Processes:** how technology consultations affect routine clinical practice

*Think of your patients pathway....  
(previous care, how they got referred, waiting time, experience of being a patient, dealing with other services?)*

*How would this change with using communication technology? What would be better? What would be worse?*

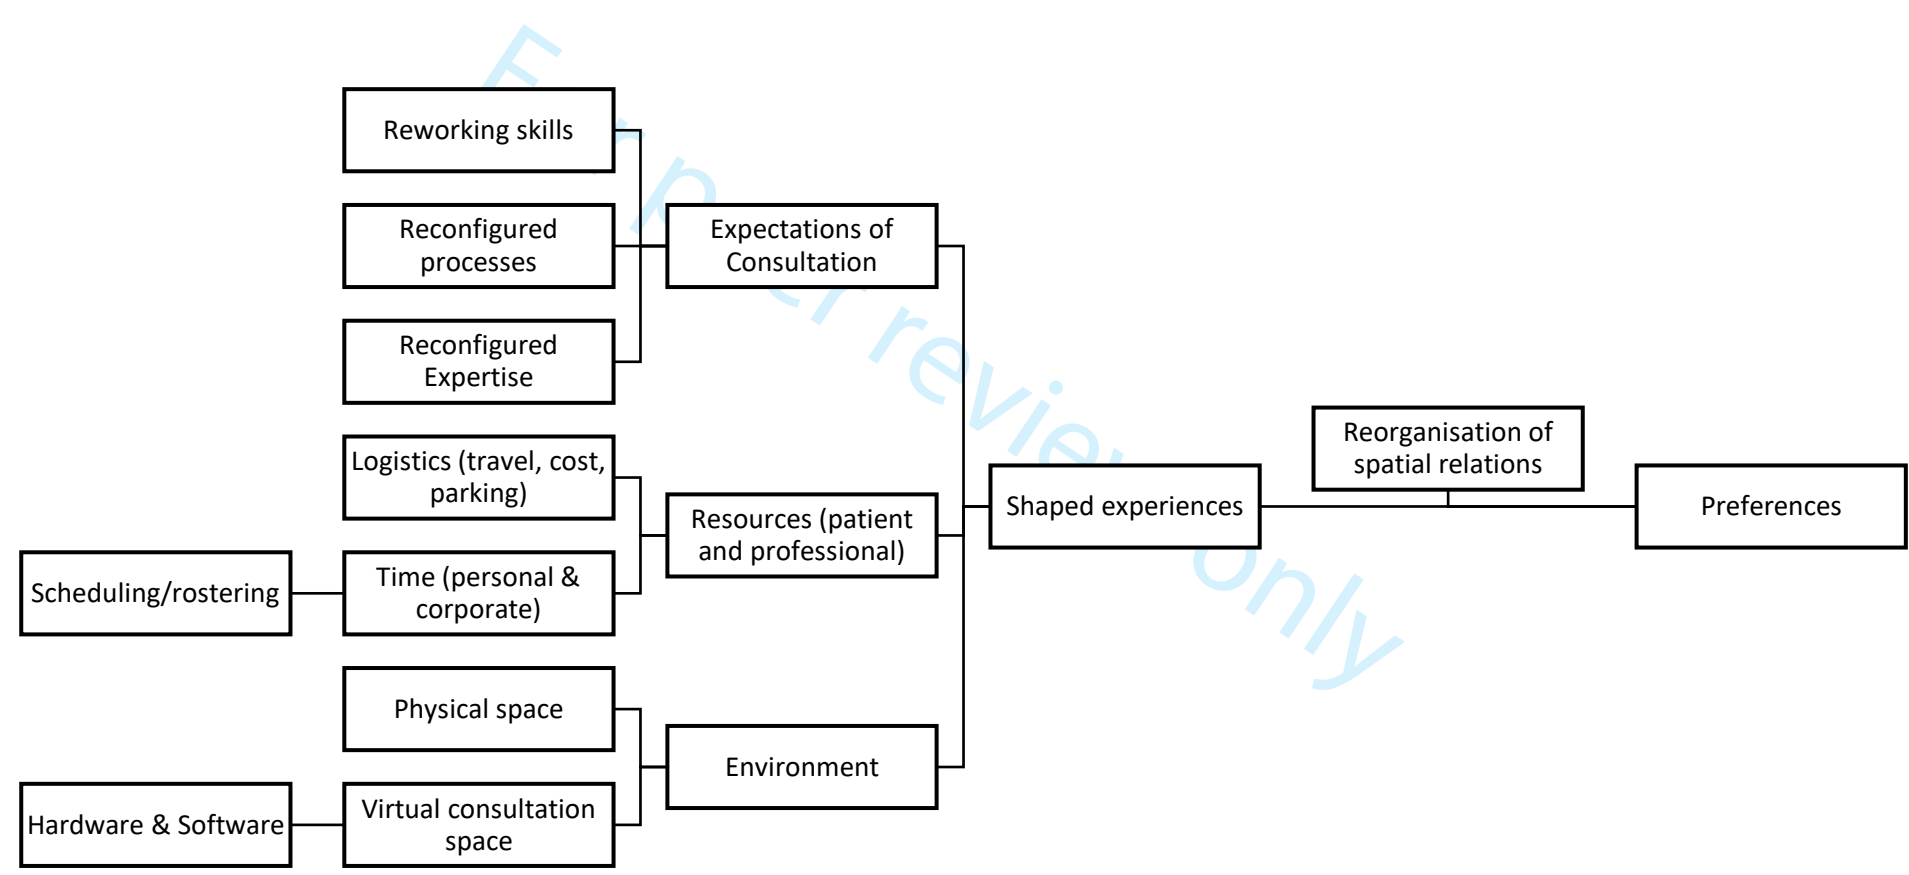

1  
2  
3  
4  
5  
6  
7  
8  
9  
10  
11  
12  
13  
14  
15  
16  
17  
18  
19  
20  
21  
22  
23  
24  
25  
26  
27  
28  
29  
30  
31  
32  
33  
34  
35  
36  
37  
38  
39  
40  
41  
42  
43  
44  
45  
46



## Part 3 – DCE Design

- **Preferences:** the potential patients see for technology as an alternative to routine face to face care

In what situations would patients be happy to use technology?

In what situations would patients not be happy to use?

What would use look like for you at the RNOH?

What would we need to consider? From a personal perspective? From others' perspective?

Anything you would like to add that might help the research?

1  
2  
3  
4  
5  
6  
7  
8  
9  
10  
11  
12  
13  
14  
15  
16  
17  
18  
19  
20  
21  
22  
23  
24  
25  
26  
27  
28  
29  
30  
31  
32  
33  
34  
35  
36  
37  
38  
39  
40  
41  
42  
43  
44  
45  
46  
47

|                                              | <b>Item</b>                                                                    | <b>Page</b> |
|----------------------------------------------|--------------------------------------------------------------------------------|-------------|
|                                              | Item 1. Title: Concise description of the nature and topic of the study.       |             |
| Title                                        | Identifying the study as qualitative or indicating the approach (e.g.,         | page 1      |
|                                              | Item 2. Abstract: Summary of key elements of the study using the abstract      |             |
| Abstract                                     | format of the intended publication; typically includes background, purpose,    | page 2      |
|                                              | Item 3. Problem Formulation: Description and significance of the               |             |
| Problem Formulation                          | problem/phenomenon studied; review of relevant theory and empirical work;      | page 4      |
| Purpose or research question                 | Item 4. Purpose or research question: Purpose of the study and specific        | page 4      |
|                                              | (e.g., ethnography, grounded theory, case study, phenomenology, narrative      |             |
|                                              | research) and guiding theory if appropriate; identifying the research paradigm |             |
|                                              | (e.g., post-positivist, constructivist/interpretivist) is also recommended;    | page 4      |
|                                              | that may influence the research, including personal attributes,                |             |
|                                              | qualifications/experience, relationship with participants, assumptions, and/or |             |
|                                              | presuppositions; potential or actual interaction between                       |             |
|                                              | researchers' characteristics and the research questions, approach, methods,    | page 16     |
| Context                                      | Item 7. Context: Setting/site and salient contextual factors; rationale.       | page 4      |
|                                              | Item 8. Sampling strategy: How and why research participants, documents, or    |             |
| Sampling strategy                            | events were selected; criteria for deciding when no further sampling was       | page 4      |
|                                              | Item 9. Ethical issues pertaining to human subjects: Documentation of approval |             |
| Ethical issues pertaining to human subjects  | by an appropriate ethics review board and participant consent, or explanation  | page 18     |
|                                              | collection procedures including (as appropriate) start and stop dates of data  |             |
|                                              | collection and analysis, iterative process, triangulation of sources/methods,  |             |
|                                              | and modification of procedures in response to evolving study findings;         | page 4      |
|                                              | Item 11. Data collection instruments and technologies: Description of          |             |
| Data collection instruments and technologies | instruments (e.g., interview guides, questionnaires) and devices (e.g., audio  | page 4      |
| Units of study                               | Item 12. Units of study: Number and relevant characteristics of participants,  | page 5      |
|                                              | Item 13. Data processing: Methods for processing data prior to and during      |             |
| Data processing                              | analysis, including transcription, data entry, data management and security,   | pages 4 & 5 |
|                                              | Item 14. Data analysis: Process by which inferences, themes, etc. were         |             |
| Data analysis                                | identified and developed, including the researchers involved in data analysis; | pages 4 & 5 |
|                                              | Item 15. Techniques to enhance trustworthiness: Techniques to enhance          |             |
| Techniques to enhance trustworthiness        | trustworthiness and credibility of data analysis,(e.g., member checking,       | page 4      |

1  
2  
3  
4  
5  
6  
7  
8  
9  
10  
11  
12  
13  
14  
15  
16  
17  
18  
19  
20  
21  
22  
23  
24  
25  
26  
27  
28  
29  
30  
31  
32  
33  
34  
35  
36  
37  
38  
39  
40  
41  
42  
43  
44  
45  
46  
47

Synthesis and interpretation

Links to empirical data

Limitations

Conflicts of interest

Funding

Item 16. Synthesis and interpretation: Main findings (e.g., interpretations, inferences, and themes); might include development of a theory or model, or

Item 17. Links to empirical data: Evidence (e.g., quotes, field notes, text contribution(s) to the field: Short summary of main findings, explanation of how findings and conclusions connect to, support, elaborate on, or challenge conclusions of earlier scholarship; discussion of scope of

Item 19. Limitations: Trustworthiness and limitations of findings

Item 20. Conflicts of interest: Potential sources of influence or perceived

Item 21. Funding: Sources of funding and other support; role of funders in data

pages 5 - 17

pages 7,9,11,13

page 17

pages 16 & 17

page 18

page 18

# BMJ Open

## Patient preferences for virtual consultations in an orthopaedic rehabilitation setting: a qualitative study

|                                 |                                                                                                                                                                                                                                                                                                                                                                                                                                   |
|---------------------------------|-----------------------------------------------------------------------------------------------------------------------------------------------------------------------------------------------------------------------------------------------------------------------------------------------------------------------------------------------------------------------------------------------------------------------------------|
| Journal:                        | <i>BMJ Open</i>                                                                                                                                                                                                                                                                                                                                                                                                                   |
| Manuscript ID                   | bmjopen-2020-041038.R2                                                                                                                                                                                                                                                                                                                                                                                                            |
| Article Type:                   | Original research                                                                                                                                                                                                                                                                                                                                                                                                                 |
| Date Submitted by the Author:   | 30-Nov-2020                                                                                                                                                                                                                                                                                                                                                                                                                       |
| Complete List of Authors:       | Gilbert, Anthony; Royal National Orthopaedic Hospital Stanmore, Therapies Department; University of Southampton, Faculty of Health Sciences<br>Jones, Jeremy; University of Southampton, Faculty of Health Sciences<br>Stokes, Maria; University of Southampton, Faculty of Health Sciences<br>May, Carl; London School of Hygiene and Tropical Medicine Faculty of Public Health and Policy; NIHR Applied Research Collaboration |
| <b>Primary Subject Heading</b>: | Health services research                                                                                                                                                                                                                                                                                                                                                                                                          |
| Secondary Subject Heading:      | Qualitative research                                                                                                                                                                                                                                                                                                                                                                                                              |
| Keywords:                       | QUALITATIVE RESEARCH, ORTHOPAEDIC & TRAUMA SURGERY, HEALTH SERVICES ADMINISTRATION & MANAGEMENT                                                                                                                                                                                                                                                                                                                                   |
|                                 |                                                                                                                                                                                                                                                                                                                                                                                                                                   |

SCHOLARONE™  
Manuscripts



I, the Submitting Author has the right to grant and does grant on behalf of all authors of the Work (as defined in the below author licence), an exclusive licence and/or a non-exclusive licence for contributions from authors who are: i) UK Crown employees; ii) where BMJ has agreed a CC-BY licence shall apply, and/or iii) in accordance with the terms applicable for US Federal Government officers or employees acting as part of their official duties; on a worldwide, perpetual, irrevocable, royalty-free basis to BMJ Publishing Group Ltd ("BMJ") its licensees and where the relevant Journal is co-owned by BMJ to the co-owners of the Journal, to publish the Work in this journal and any other BMJ products and to exploit all rights, as set out in our [licence](#).

The Submitting Author accepts and understands that any supply made under these terms is made by BMJ to the Submitting Author unless you are acting as an employee on behalf of your employer or a postgraduate student of an affiliated institution which is paying any applicable article publishing charge ("APC") for Open Access articles. Where the Submitting Author wishes to make the Work available on an Open Access basis (and intends to pay the relevant APC), the terms of reuse of such Open Access shall be governed by a Creative Commons licence – details of these licences and which [Creative Commons](#) licence will apply to this Work are set out in our licence referred to above.

Other than as permitted in any relevant BMJ Author's Self Archiving Policies, I confirm this Work has not been accepted for publication elsewhere, is not being considered for publication elsewhere and does not duplicate material already published. I confirm all authors consent to publication of this Work and authorise the granting of this licence.

## *BMJ OPEN*

# Patient preferences for virtual consultations in an orthopaedic rehabilitation setting: a qualitative study

### Authors

1. Anthony W Gilbert<sup>1, 2, 3</sup>
2. Jeremy Jones<sup>2</sup>
3. Maria Stokes<sup>2,4</sup>
4. Carl R May<sup>3,5</sup>

### Author Affiliations

1. Therapies Department, Royal National Orthopaedic Hospital, Stanmore, UK.
2. School of Health Sciences, Faculty of Environmental and Life Sciences, University of Southampton, Southampton, UK
3. NIHR Applied Research Collaboration, North Thames.
4. NIHR Applied Research Collaboration, Wessex
5. Faculty of Public Health and Policy, London School of Hygiene and Tropical Medicine, London, UK

Corresponding author: Anthony Gilbert [anthony.gilbert@nhs.net](mailto:anthony.gilbert@nhs.net)



## Abstract

**Objectives:** To identify, characterize and explain factors that influence patient preferences, from the perspective of patients and clinicians, for virtual consultations in an orthopaedic rehabilitation setting.

**Design:** Qualitative study using semi-structured interviews and abductive analysis.

**Setting:** A physiotherapy and occupational therapy department situated within a tertiary orthopaedic centre in the UK.

**Participants:** Patients who were receiving orthopaedic rehabilitation for a musculoskeletal problem. Occupational therapists, physiotherapists or therapy technicians involved in the delivery of orthopaedic rehabilitation for patients with a musculoskeletal problem.

**Results:** Twenty-two patients and twenty-two healthcare professionals were interviewed. The average interview length was forty-eight minutes. Four major factors were found to influence preference: the situation of care (the ways that patients understand and explain their clinical status, their treatment requirements, and the care pathway), the expectations of care (influenced by a patients desire for contact, psychological status, previous care and perceived requirements), the demands of care (of care, of each patients respective social situation and the consequences of choice) and the capacity to allocate resources to care (these include financial, infrastructural, social and healthcare resources).

**Conclusion:** This study has identified key factors that appear to influence patient preference for virtual consultations in orthopaedic rehabilitation. A conceptual model of these factors, derived from empirical data, has been developed highlighting how they combine and compete. A series of questions, based on these factors, have been developed to support identification of preferences in a clinical setting.

## Strengths and limitations of this study

- This is the first qualitative investigation of patient preferences for virtual consultation in a tertiary orthopaedic setting.
- Theoretical insights and explanations generated from this paper are developed from empirical data.
- Maximum variation sampling and abductive qualitative analysis reveal key factors that shape patient preferences.
- Single site qualitative study is not generalisable but mechanistic model is likely to be transportable between settings.

## Background

Videoconferencing technologies, such as Skype, Zoom, Attend Anywhere and MS Teams, have been received enthusiastically by healthcare policy makers<sup>1-3</sup> as they provide a medium to improve access to care. The technology is also viewed as a significant contributor to health and wealth<sup>4</sup> and efficiency gain strategies<sup>5</sup>. Videoconferencing technologies are being used across many fields of healthcare<sup>6</sup> and can offer advantages to patients. In January 2020, the United Kingdom recorded its first case of Novel Coronavirus (COVID-19). The outbreak of COVID-19 placed the NHS under significant strain. Social distancing measures were introduced in the United Kingdom in March 2020 and Virtual Consultations (VC) (via telephone or video call) were identified as a potential alternative to face-to-face consultations at this time<sup>7,8</sup>. Organisations were forced to rapidly implement VC as a consequence of COVID-19<sup>9</sup>.

Greenhalgh et al<sup>10</sup> conducted a multilevel mixed methods study of Skype consultations and found that they were safe, effective and convenient for patients when healthcare professionals judged them clinically appropriate. However, the authors<sup>10</sup> found that the reality of establishing VCs in outpatient services was more complex than originally anticipated. This complexity is a longstanding problem in the implementation of telemedicine and telecare systems<sup>11</sup>.

### Patient preferences and burden of treatment

A preference can be defined as an individualised 'total subjective comparative evaluation'<sup>12</sup>. Put simply, an individual weighs up the characteristics of alternatives to make a decision. Preference theory suggests that a person will prefer the outcome that yields greatest utility, and therefore that patients would prefer a VC if they believe its benefits outweigh its burdens<sup>12</sup>. To date, patient preferences for telemedicine have only been investigated at a general population level<sup>13</sup>.

VCS have been shown to change what is required of patients<sup>14 15 16</sup>. A workload for patients that exceeds their capacity has been demonstrated to be a driver of treatment burden for those with lung cancer and chronic obstructive pulmonary disease<sup>17</sup>. Treatment burden in patients with stroke has been shown to be influenced by the quality and configurations of healthcare<sup>18</sup>. What is not yet understood is how changes in the work and demands of being a patient as a result of VC influence preference for VC in a healthcare setting.

Patients' and professionals' preferences for telemedicine are not isolated from their other experiences of healthcare, or from the ways that they experience other aspects of their lives. If we are interested in the ways that patients understand and calculate the relationship between benefits and burdens, then we should also include burdens in our investigation. Shippee et al's<sup>19</sup> cumulative complexity model assumes an arithmetical relationship between delegated health system workload and individual patient capacity, and suggests that this explains healthcare utilization. However, health behaviours and service utilisation take place in a broader social context, and Burden of Treatment theory (BoT)<sup>20</sup> provides a way into this problem. BoT explains the relationship between the demands that participating in healthcare places on patients and caregivers (their workload), and the affective, cognitive, relational and material resources that they can bring to bear on this workload (their capacity).<sup>21 22</sup>

1  
2  
3 To our knowledge, no studies have yet investigated the relationship between patient preferences  
4 around telemedicine services and their experience of burden of treatment. We need to better  
5 understand this to support the development of care pathways that take into account what offers  
6 patients increased utility. This paper therefore aims to identify, characterise, and explain factors  
7 that influence patient preferences for VCs in an orthopaedic rehabilitation setting.  
8  
9

## 10 11 Methods

12 This paper is part of a larger body of work and forms phase II of the CONNECT Project. The  
13 protocol for the CONNECT Project has been published elsewhere<sup>23</sup>.  
14  
15

### 16 Setting

17  
18 The research was conducted within a single specialist orthopaedic hospital in North London, UK.  
19 All participants were recruited from the Occupational Therapy and Physiotherapy Department.  
20

### 21 Participants

22  
23 A maximum variation sample was recruited; we intended to sample our patients on a set criteria  
24 of variation (set for age and gender for patients and occupation for clinicians). This included 22  
25 patients and 22 healthcare professionals (see table 1 for the inclusion and exclusion criteria). We  
26 aimed to recruit as least 10 male and 10 female patients (10 <50 years, 10 >50 years) and 20  
27 healthcare professionals (occupational therapists and physiotherapists). Patients were selected to  
28 be interviewed to identify factors that influence patient preferences for VCs. Clinicians were  
29 selected to be interviewed to provide their perspectives on patient preference and as patient  
30 preferences are moderated by the possibilities and preferences of organisations and staff. The  
31 first two patients and healthcare professionals were used to pilot the interview schedule (See  
32 Supplementary Materials 1-2).  
33  
34  
35  
36

### 37 Recruitment

38  
39 The study was advertised using a pop-up banner in the Occupational Therapy and Physiotherapy  
40 Departments. Patients were encouraged to discuss the study with their treating healthcare  
41 professional or could approach the researcher directly via email. Healthcare professionals were  
42 sent a departmental wide email informing them of the study both from the perspective of  
43 discussing with patients as well as enrolling as a participant. Suitable and interested potential  
44 participants were provided with a participant information sheet and given at least 24 hours to  
45 discuss the study with the researcher. They were enrolled in the study upon receipt of informed  
46 written consent.  
47  
48  
49  
50  
51  
52  
53  
54  
55  
56  
57  
58  
59  
60

### Data Collection

Design of the interview schedules were formed by Burden of Treatment Theory<sup>24</sup> (see supplementary materials 1-2) and the results of Phase I of the CONNECT Project<sup>15</sup>. Interviews were conducted on site at the hospital or virtually using phone or SKYPE. Interviews were conducted by AWG and were to last around 60 minutes with the option to extend or shorten as required. All interviews were audio recorded and sent off for transcription to an external company. All transcripts were emailed or posted to participants upon receipt to give them the option to verify the data or to make any adjustments.

### Data Analysis

Interview transcripts were reviewed and uploaded into NVIVO (version 12). Data analysis followed the principles of abduction as set out by Tavory and Timmermans<sup>25</sup>. Coding was undertaken by AWG and CRM. Open coding techniques were used to identify empirical regularities (themes) in the data. Data that matched the results of the CONNECT Project Phase I were temporarily set aside; this research sought abductive 'surprises' (new themes) in additions to those gained from our previous work. Useful data to support the design of a Discrete Choice Experiment (a forthcoming paper that constitutes phase III of the CONNECT Project) were set aside. The new themes were interrogated for attributions about patient preferences and the factors that shape them. Attributions were assigned to codes within these new themes following discussion between AWG & CRM. Attributions were subsequently discussed between AWG and JJ to ensure they made sense and were accurate representations of these data. No changes were required to attributions at this stage. Inferences were made about the ways that preferences worked, the relative position and significance of the factors that shaped them, forming abductive explanation. Data matching the themes from Phase I were then incorporated once theoretical insights were formed. Finally, themes arising from the data were mapped out in a model by AWG to visualise how different factors might influence preference for virtual consultations. The theoretical model was reviewed by all authors to verify its content. A summary of these methods can be seen in Figure 1. Reporting was conducted using the Standards for Reporting Qualitative Research<sup>26</sup> (See supplementary material 3).

Figure 1 – flow diagram of methods

Table 1 – Inclusion and exclusion criteria

| Inclusion criteria                                                                                                                                                                                                                                                                                                                                                                                                                                                                                                                                                                         | Exclusion criteria                                                                                                                                                                                                                                                                                                                                                                                                                                                  |
|--------------------------------------------------------------------------------------------------------------------------------------------------------------------------------------------------------------------------------------------------------------------------------------------------------------------------------------------------------------------------------------------------------------------------------------------------------------------------------------------------------------------------------------------------------------------------------------------|---------------------------------------------------------------------------------------------------------------------------------------------------------------------------------------------------------------------------------------------------------------------------------------------------------------------------------------------------------------------------------------------------------------------------------------------------------------------|
| <ul style="list-style-type: none"> <li>• Patients, over the age of 18 years, attending the RNOH for Physiotherapy or Occupational Therapy</li> <li>• Patients who have experience of orthopaedic / musculoskeletal condition</li> <li>• Patients who are able to provide informed written consent to enter into the study</li> <li>• Patients able to understand and speak English or a language covered by the RNOH Interpreter service</li> <li>• Physiotherapists or Occupational Therapists (or assistants) who treat patients with orthopaedic / musculoskeletal disorders</li> </ul> | <ul style="list-style-type: none"> <li>• Patients without the capacity to consent</li> <li>• Patients suffering from disorders other than orthopaedic as the primary cause (eg neurological or oncology disorders)</li> <li>• Physiotherapists or Occupational Therapists who do not currently treat, or have no experience of treating patients with orthopaedic / musculoskeletal disorders</li> <li>• Patients currently or previously treated by AWG</li> </ul> |

## Patient and Public Involvement

The CONNECT Project Patient and Public Involvement steering group (PPISG) has been set up to provide guidance on the conduct of the research (details available from [www.theconnectproject.info](http://www.theconnectproject.info)). The first meeting of the PPISG was held in August 2016 prior to the submission of the research to the National Institute for Health Research in May 2017. A discussion was held about the overall research aims which supported the identification of the research questions. The PPISG has supported the design of the overall research plan and will continue to be involved during the development and refinement of each phase prior to the completion of each study protocol. The participant information and consent forms and the discussion guide for this research was reviewed by the PPISG. In addition, the PPISG will support the development of the lay summary outputs to be disseminated to patients and the public.

## Results

No changes were made to the interview schedule after the pilot interviews and these data were included in the study. Forty-four participants were interviewed in the study; 22 patients (12 female, average age 46 [range 20-78]) and 22 healthcare professionals (13 physiotherapists, 14 female). The average interview length was 48 minutes [range 28 – 81 minutes]. Two patient interviews were conducted over the phone and two over Skype. Two healthcare professional interviews were conducted over the phone. No participants returned their transcripts and therefore no amendments were made.

### Interview Data

1  
2  
3 Four themes were identified from the data: (i) the situation of care, (ii) expectations of care, (iii)  
4 demands on the patient and (iv) capacity to allocate resources to care. Results from interviews are  
5 presented by theme and evidenced in tables 2a-2d which present data from both patients and  
6 healthcare professionals.  
7

### 8 9 Theme 1: Situation of care

10 The situation represents the ways that patients understand and explain their clinical status, their  
11 treatment requirements, and the care pathway.  
12

#### 13 14 (i) *Clinical status*

15  
16 Patient preferences varied based on the clinical challenges patients faced at that time and the  
17 patient's capacity to meet the demands the clinical status required. Healthcare professionals had  
18 an awareness of the volatile nature of patient's clinical status. Patients who had a long term  
19 orthopaedic condition had an awareness that their clinical status has the potential to both worsen  
20 and improve with some patients experiencing this degree of volatility. The patient's orthopaedic  
21 problem could stand alone or was in conjunction with other physical or mental health issues.  
22

#### 23 24 (ii) *Treatment requirements*

25  
26 The requirements of treatment are dependent on the clinical status of the patient, in accordance  
27 with the normal management for that status. A spectrum of management strategies may be  
28 required, some of which traditionally require hands-on treatment and others which can be  
29 delivered without physical contact. Some clinical status' require forced restriction of activities  
30 which make physical attendance challenging, whereas other status' require physical contact.  
31

#### 32 33 (iii) *Care pathway*

34  
35 Patient preferences are influenced by the care that is available. This includes the length of the  
36 appointment, number of appointments and regularity of these and the time of day of the  
37 appointments. Some patients who found accessing care challenging would feel less inclined to  
38 travel if the appointment was very short or at an inconvenient time of day. Others would be  
39 prepared to travel, whatever the offering. Regular repeated appointments can be burdensome for  
40 patients, particularly those with other commitments that might use up capacity. Patients with  
41 infrequent appointments appeared to favour face-to-face (F2F) appointments, although there  
42 were exceptions to this. Healthcare professionals commented on the rigidity of corporate  
43 resources, with some finding the volume of workload reduced their capacity to be flexible, for  
44 instance finding time to support patients with managing their VC.  
45  
46  
47  
48  
49  
50  
51  
52  
53  
54  
55  
56  
57  
58  
59  
60

Table 2a – Theme 1: Situation of care

| Factor                 | Description                                                                                                                                        | Patients Accounts                                                                                                                                                                                                                                                                                                                                                                                                                                                                                                                                                                                                                                          | Healthcare Professionals Accounts                                                                                                                                                                                                                                                                                                                                                                                                                                                                                                                                                                                                                                                                              |
|------------------------|----------------------------------------------------------------------------------------------------------------------------------------------------|------------------------------------------------------------------------------------------------------------------------------------------------------------------------------------------------------------------------------------------------------------------------------------------------------------------------------------------------------------------------------------------------------------------------------------------------------------------------------------------------------------------------------------------------------------------------------------------------------------------------------------------------------------|----------------------------------------------------------------------------------------------------------------------------------------------------------------------------------------------------------------------------------------------------------------------------------------------------------------------------------------------------------------------------------------------------------------------------------------------------------------------------------------------------------------------------------------------------------------------------------------------------------------------------------------------------------------------------------------------------------------|
| Clinical status        | The healthcare complaint the patient experiences, its stability, reversibility and its impact on the patient in conjunction with other complaints. | <p><i>If I'm having a flare-up, sometimes I can't even leave the house. I get stuck indoors and I just wouldn't be able to do much really [P7]</i></p> <p><i>It was really annoying because it had, like, dislocated, it was dislocated loads before and after to the point that it was really affecting my life. Then I got banned from doing stairs, I couldn't go out here, I couldn't go out there, couldn't really walk anywhere [P5]</i></p>                                                                                                                                                                                                         | <p><i>You go back, and then sometimes they make an x amount of improvement, or they have a flare up and then it goes back a bit because they get really stressed out. They're back to that fearful of movement [C7]</i></p> <p><i>They're not managing those flare-ups particularly well, so they end up missing classes and things like that. It's become a bit of a spiral to have that - the physical is having a knock on the mental which is having a knock-on effect on the physical and they're just spiralling out of control [C14]</i></p>                                                                                                                                                            |
| Treatment requirements | The treatment and management of the complaint that is required. The restrictions imposed on the patient.                                           | <p><i>But after surgery, I was literally bedbound for three months, so for three months I couldn't do anything [P20]</i></p> <p><i>We're just building up my stamina I think at the moment. Not with the hands but with the shoulders. We're just starting slow, building up [P3]</i></p> <p><i>So, they've basically come up with a programme for my gym telling me how often I should do it, giving me encouragement saying you're a bit better [P6]</i></p>                                                                                                                                                                                             | <p><i>... building arm strength, stability, muscle patterning, working whole kinetic chain, core stability, lots and lots of gluteal rehab, putting a big emphasis on to their understanding of what's a good muscle ache and what they should be feeling and what's working to fatigue rather than what's working into their pain, and then understanding what's an okay pain to have, what's okay to work through, what's not okay to work through [C11]</i></p>                                                                                                                                                                                                                                             |
| Care Pathway           | The availability of healthcare to the patient                                                                                                      | <p><i>On a Skype, are you going to have a half an hour appointment? Or are you just - is it just a check up to see that you're doing the exercises correctly and they say, right, okay, fine carry on with those? Or that looks really good. So, I think it depends on the time apart, how far you are from the hospital [P2]</i></p> <p><i>So if it was once every three months, I'd definitely prefer to have - and so, maybe the later stages and everything's better, then I wouldn't mind having the Skype session, but in terms of the actual rehab and getting from surgery back to performance, I'd definitely like to see a physio. [P20]</i></p> | <p><i>...face-to-face slots for me particularly can be - would be really normal to have to wait six to eight weeks for another appointment just because of our system and the vast amount of patients that we have [C15]</i></p> <p><i>I think doing it as an adjunct where it's extra, we just don't have the capacity for a start, even if it was to [text doing], doing things like that. I think that would be difficult to fit in [C1]</i></p> <p><i>At the moment our face-to-faces are an hour. We don't know that when we do virtual it could be actually much more efficient for us. We could do a really good 30-minute telephone consultation and we can actually fit more of them in [C18]</i></p> |

## Theme 2: Expectations of care

Patients have expectations for both VC and F2F consultations. These expectations are influenced by a patient's desire for contact, psychological status, previous care and perceived requirements.

### (i) *Desire for contact*

Patients had beliefs about the effectiveness of a VCs in comparison to a F2F therapy session. They preferred F2F consultations if they believed they would have more favorable outcomes as a result. Patients also preferred F2F contact if they felt their condition was complicated and warranted a physical examination. Healthcare professionals believed that VCs were not capable of delivering the physical aspect of a session.

### (ii) *Psychological status*

Patient motivation and self-efficacy was an important consideration for both patients and healthcare professionals. Some patients felt they were less likely to complete prescribed care if they were attending virtually whereas others felt that VCs could reduce the anxieties associated with F2F interactions and travelling into the hospital. Some patients, however, found the idea of seeing themselves on a screen stressful. Healthcare professionals had an awareness of the potential limitations to offer empathy via VC to the patients who desired it.

### (iii) *Previous care*

Patients previous experience influenced their preference for VC. Patients who had built up a good rapport with their current care team felt that they want F2F to continue whereas others felt that, as they trusted their healthcare professionals, they would be willing to try a new innovation. Patients who had received sub-optimal care elsewhere felt that they would be more likely to stick to the status quo if this worked well for them. Healthcare professionals were sensitive to the varied experiences and expectation of patients.

### (iv) *Perceived requirements*

Patients who feel the need for hands on F2F care reported a preference towards F2F care. Patients who did not feel this was necessary did not feel the same way towards this. Care requirements differed based on the individual circumstances of the patient and the length of time of the appointment. Patients who travelled less frequently preferred to receive a physical examination, often as a 'checkup' to assess the physical status of the problem.



Table 2b – Theme 2: Expectations of care

| Factor                 | Description                                                                                                          | Patients Accounts                                                                                                                                                                                                                                                                                                                                                                                                                                                                                                                                                                                                                                                                                                                                                                                                                                        | Healthcare Professionals Accounts                                                                                                                                                                                                                                                                                                                                                                                                                                                                                                                                                              |
|------------------------|----------------------------------------------------------------------------------------------------------------------|----------------------------------------------------------------------------------------------------------------------------------------------------------------------------------------------------------------------------------------------------------------------------------------------------------------------------------------------------------------------------------------------------------------------------------------------------------------------------------------------------------------------------------------------------------------------------------------------------------------------------------------------------------------------------------------------------------------------------------------------------------------------------------------------------------------------------------------------------------|------------------------------------------------------------------------------------------------------------------------------------------------------------------------------------------------------------------------------------------------------------------------------------------------------------------------------------------------------------------------------------------------------------------------------------------------------------------------------------------------------------------------------------------------------------------------------------------------|
| Desire for contact     | Whether the patient / healthcare professional believes the F2F is more of a capable method of care delivery than VC. | <p><i>I'm sure I could do that at home on my own but personally I would feel comfortable knowing I've got a person actually feeling it. [P16]</i></p> <p><i>If it's something simple then, yes, that's a good idea. If it's something a bit more complicated they actually have to come and see it because it's more of a hands-on type of thing [P8]</i></p>                                                                                                                                                                                                                                                                                                                                                                                                                                                                                            | <p><i>we definitely can't do is gait re-education or gait analysis. We could probably demonstrate exercises ourselves, but actually if we're looking at a movement habit in terms of, say, how someone's shoulder moves, or you need to really see or perhaps feel what that is, I think that's obviously not able to do that [C15]</i></p> <p><i>Obviously, if it was a more physical session, if it was a practical session, that's not going to work particularly well; it's not going to work very well on Skype [C12]</i></p>                                                             |
| Psychological status   | The psychological status of the patient and the impact of this on care across different delivery formats.            | <p><i>One of the reasons why the screens would be good is I would feel less anxious to talk to someone through a screen, but I would in the same room [P9]</i></p> <p><i>You don't like the way that your life's going to look because you know you're not going to be able to achieve all the things that you want to achieve [P17]</i></p> <p><i>Over the years I have done a lot of leg and knee exercises... especially immediately after surgery... I probably should keep them going but I have to say I haven't. [PP2]</i></p> <p><i>I guess because I was in a leg brace for so long, stuff did get shouted at me and I did get called things and that, so my self-confidence isn't the best in the world [...] So to see myself in the corner of a screen doing something, it would stress me out for quite a huge amount of time. [P5]</i></p> | <p><i>It might also make them feel a bit less anxious about having to travel, having to worry if my therapist or whoever I'm coming to see makes me feel welcome or makes me feel comfortable... It might make them feel a bit more comfortable if they're in their own environment [C16]</i></p> <p><i>I think it's that how much do the patients value that just talking to someone in person, that relationship side of things and those sorts of things that maybe they might not feel so safe to do ... and also sometimes patients just want a hug [C1]</i></p>                          |
| Previous care          | Experience of previous care                                                                                          | <p><i>Yeah, I think you, for me, I feel like I've been able to build up more of a bond with them all because I've seen them in person, whereas if it had been over a screen or a phone, I don't think I would have had that [P5]</i></p> <p><i>So, I've had physio on and off for fibromyalgia and actually I've been able to connect with this much better because of the way it's delivered [P3]</i></p>                                                                                                                                                                                                                                                                                                                                                                                                                                               | <p><i>I don't think you can give a one size fits all to people. Some men particularly they just want a number, they want a number, they want sets they want reps. They just want a very clear structure and some people just you have to go that way because they react better to it. They're more likely to be more adherent to exercise if they go that way. Other people it's just a case of listening to your body, see how you feel, see what you manage. Because if you push them too far or push too little you could - you're just going to end up failing them, I think [C14]</i></p> |
| Perceived requirements | The negotiated requirements of the session                                                                           | <p><i>We tend to come down to RNOH probably once every six months now just for a check-in... so that she can then check up on those joints and make sure that I don't need to change what I'm doing or we don't need to look into it and get things investigated with orthopaedics [P17]</i></p>                                                                                                                                                                                                                                                                                                                                                                                                                                                                                                                                                         | <p><i>I think it also depends on the population. Not everyone has complex needs as well. I think if we have a routine primary knee replacement there's no reason why you can't get everything. If you have a flare referral you'd be fine to do a 30 minute, whereas if you have a revision who's had five surgeries, 30 minutes is probably not going to be enough, because there will be a lot of belief systems around that which probably need to be looked into. So, yes and no. It depends on what the patient group is [C7]</i></p>                                                     |

### Theme 3: Demands on the patient

Patients may face multiple and differing demands dependent on the choices they make regarding a VC or a F2F consultation. Demands include the care requirements, social demands and the consequences of choice.

#### *(i) Care requirements*

The care requirements are dependent on the clinical status of the patient. Patients may be required to complete complex exercise regimens or perform assessments. Some of these initiatives may benefit from optimal visualisation of movements. Some of these may require hands on facilitation. For others, manual therapy may be indicated. Preferences are likely to be mediated by what the healthcare professional believes and the consequence of choice will change the demands on patients. These changes may be burdensome depending on the patient's capacity.

#### *(ii) Social demands*

Some patients in this study reported a vast array of social demands that interfered with healthcare, such as caring for elderly relatives or young children. Often, these conflicting demands interfered with the patient's ability to attend their own appointments and rehabilitation. Patients who reported excessive social demands reported that in some circumstances VCs could be more favorable.

#### *(iii) Consequence of choice*

The use of virtual consultation equipment may require a new skill set. Patients might also need to obtain rehabilitation equipment and technology for VC. Patients who did not have the space and rehabilitation equipment available preferred to travel in for a F2F consultation. Patients that found the idea of interacting with their rehabilitation professional over a screen challenging where more likely to prefer F2F appointments whereas others did not see this as an issue. Overcoming the lack of physical contact and adapting assessments proved to be an issue for some. The lack of a suitable rehab environment was a concern to some healthcare professionals.

The demands faced by patients arose as a direct result of the situation in conjunction with the capacity to fulfil the demands. Patients who felt that VCs were less burdensome may have a preference towards VCs whereas those who find them more burdensome may have a preference towards F2F consultations.

Table 2c – Theme 3: Demands on the patient

| Factor                 | Description                                                    | Patients Accounts                                                                                                                                                                                                                                                                                                                                                                                                                                                                                                                                                                                                                                                                                                                                                                                                                                                                                                    | Healthcare Professionals Accounts                                                                                                                                                                                                                                                                                                                                                                                                                                                                                                                                                                                                                                                                                                                                                                                                                                                                  |
|------------------------|----------------------------------------------------------------|----------------------------------------------------------------------------------------------------------------------------------------------------------------------------------------------------------------------------------------------------------------------------------------------------------------------------------------------------------------------------------------------------------------------------------------------------------------------------------------------------------------------------------------------------------------------------------------------------------------------------------------------------------------------------------------------------------------------------------------------------------------------------------------------------------------------------------------------------------------------------------------------------------------------|----------------------------------------------------------------------------------------------------------------------------------------------------------------------------------------------------------------------------------------------------------------------------------------------------------------------------------------------------------------------------------------------------------------------------------------------------------------------------------------------------------------------------------------------------------------------------------------------------------------------------------------------------------------------------------------------------------------------------------------------------------------------------------------------------------------------------------------------------------------------------------------------------|
| Care requirements      | The requirements of care                                       | <p><i>It depends what you're asking them to - if it was - it depends. If it's something simple then, yes, that's a good idea. If it's something a bit more complicated they actually have to come and see it because it's more of a hands-on type of thing [P8]</i></p> <p><i>I suppose it's not so much the conversations but the physical things that you might have to do. It would be very difficult for them to work out - if you're talking physiotherapy - just how your joints were working. They couldn't really see what your back was doing or how your arm was working or whatever, and you can't - they need to feel. Physiotherapy's quite a hands on the body sort of thing [P4]</i></p> <p><i>It's ridiculous in the sense that appointments have almost become a full-time job for me. I'm really grateful, I've got a lovely team of people that know me very well and look after me [P10]</i></p> | <p><i>How many exercises can they realistically fit in their day? I'd rather they did one or two really well than five or six badly [C11]</i></p> <p><i>I guess if they've had no restrictions really at all, then to completely have those restrictions - and it can be quite debilitating because they're so used to being independent and not having to really rely on others [C4]</i></p> <p><i>we do often use our hands for some assessment in terms of feeling for muscle-activated patterns or guarding [C15]</i></p> <p><i>We do lay on our hands. It might well be around showing someone that they've become really hypersensitive. Touching them on an area of skin that is not at all uncomfortable and saying what does that feel like, does it feel like I'm poking, whatever, and then putting your hand on their back or something and then say how does that feel? [C10]</i></p> |
| Social demands         | The competing life demands that can interfere with healthcare. | <p><i>I think, because I'm not looking after my mum, my mum has gone into a care home now. At the moment I haven't a job. I'm not working. I'm at home, I'm just doing things at home. I still go to the care home and sort things out for mum and appointments and that [P2]</i></p>                                                                                                                                                                                                                                                                                                                                                                                                                                                                                                                                                                                                                                | <p><i>I think for some people things are muddling along and I probably should work on my routine, but I've got my kids, I've got my work - this takes priority and that's I think my role is trying to tease that out a bit more. So, what is your priority right now? [C12]</i></p> <p><i>Maybe this is where the overwhelmingness comes in because if you are not doing any of things you suddenly feel like you have to change your entire life to be able to manage if some of what we have said isn't said carefully [PC1]</i></p>                                                                                                                                                                                                                                                                                                                                                            |
| Consequences of choice | The impact of choice                                           | <p><i>For me, it's the equipment. I only live in a small - and it is small, isn't it - a small two-bedroom house. I would have nowhere to store the equipment... there's no option out there to rent equipment [P19]</i></p> <p><i>Some of the stuff he doesn't need to touch me for, like when he's watching me do a squat. Are my knees going the right way? Yeah. He can do that over a FaceTime. That's absolutely fine. But as you say, he needs to - if he wants to check my strength physically, then yeah, I need to be here. It only limits that [P14]</i></p>                                                                                                                                                                                                                                                                                                                                              | <p><i>You might subconsciously use that [travel time] in a beneficial way... If you are straight in on a computer screen maybe there is some prep time that is not build in to the process as easily and you have to be mindful of preparing yourself beforehand [PC1]</i></p> <p><i>If you think about the patient that is actually sent into a flare-up from the journey that they've made... [C8]</i></p> <p><i>So often if they want to try and demonstrate exercises, a common feedback is the fact that their bed's too hard or too soft and it doesn't work, and the plinths are easier to do it [C1]</i></p>                                                                                                                                                                                                                                                                               |

#### Theme 4: Capacity to allocate resources to care

*Capacity* is the patient's ability to allocate resources to care. These resources are financial, infrastructural, social and healthcare related.

(i) *Financial*

Patients found that the demands of travel to a physical appointment can be costly, particularly when this entailed long journeys by public transport. Some patients were required to take unpaid leave from employment or risk losing their job. Some patients had supportive employers or did not feel significantly impacted through the cost of attendance. Healthcare professionals were aware of these these financial challenges faced by patients.

(ii) *Infrastructure*

Patients needed to have access to the hardware and software in order to use VC as a form of consultation. There was a requirement to understand how to use the technology in order to undergo a successful VC. Variations of hardware and software exist. There did not appear to be any relationship with type of hardware and software combination and preference. Some devices with larger screens were thought to be more beneficial and influence *expectations*. In addition, patients needed to have access to a suitable environment and equipment in order to undergo virtual rehabilitation.

(iii) *Social capacity*

Patients who had a support network available to them found this was a useful resource. Family members were able to assist with the logistics of travel to appointments, activities routines at home and motivation to engage with rehabilitation programmes. Healthcare professionals reported ways in which patients could enhance capacity through their social networks.

(iv) *Healthcare system*

The healthcare system can provide capacity. For example, some patients received hospital funded transport making attendance at the hospital easier. Healthcare professionals are skilled at facilitating motivation and behavior change which could improve capacity. Expectations of success may provide patients with additional motivation and self-efficacy to achieve the demands required of them.

Capacity is an important mediator of preference as it dictates whether or not a patient has the available resources to meet the demands of the situation and the expectations. Capacity is a mediator between the types of influences at work and has a direct influence on preference (See Figure 2).

The *Situation* is a factor that influences preference. Each situation is unique to the individual based on their clinical status, treatment requirements and the availability of care. The situation is influenced by the *Capacity* of the patient which in turn influences the *Demands* and the *Expectations* of patients. Whilst certain factors influence preferences for a patient in one direction, other factors may have an opposite effect.

Table 2d – Theme 4: Capacity to allocate resources to care

| Factor            | Description                                    | Patients Accounts                                                                                                                                                                                                                                                                                                                                                                                                                                                                                                                                                                                                                                                                                                                  | Healthcare Professionals Accounts                                                                                                                                                                                                                                                                                                                                                                                                                                                                                                                                                                                                                                                                             |
|-------------------|------------------------------------------------|------------------------------------------------------------------------------------------------------------------------------------------------------------------------------------------------------------------------------------------------------------------------------------------------------------------------------------------------------------------------------------------------------------------------------------------------------------------------------------------------------------------------------------------------------------------------------------------------------------------------------------------------------------------------------------------------------------------------------------|---------------------------------------------------------------------------------------------------------------------------------------------------------------------------------------------------------------------------------------------------------------------------------------------------------------------------------------------------------------------------------------------------------------------------------------------------------------------------------------------------------------------------------------------------------------------------------------------------------------------------------------------------------------------------------------------------------------|
| Financial         | The ability to free up financial resources     | <p><i>So obviously taking an afternoon off as annual leave or whatever wouldn't result in a disciplinary, but then in the long-run I have to think... [P5]</i></p> <p><i>If you're doing it once a week or something, you're spacing it out... it's travelling there. That would be - it's expensive to travel up here because it's not exactly in the closest of areas, it's in the middle of nowhere [P7]</i></p>                                                                                                                                                                                                                                                                                                                | <p><i>They might have a bit more support but again they've then got to think about to do - if they're paying for it privately there's the added cost to them [C4]</i></p> <p><i>When I think about some of these patients that come like three hours on public transport - what a waste of money that is. I think of patients that come all the way from Birmingham and Brighton. That doesn't make any sense to me, and actually at times I have said I think we should do this on the phone [C17]</i></p>                                                                                                                                                                                                   |
| Infrastructure    | Access to material and informational resources | <p><i>You could get a stand and you'd be able to see everything really. If you put it on a table, if you need to sit on a chair. You could pull it a bit away from you so they can see you. I reckon definitely it would work [P7]</i></p> <p><i>I would either Skype on my laptop or Skype on my thing, and if I could transfer to the TV, you know? I've got a smart TV, it could be done that way. Because if you've got a bigger picture you could see more, you could do more, whereas if you've got a little screen your vision is very limited to a little square [P8]</i></p>                                                                                                                                              | <p><i>If you haven't got a laptop and Skype at home, then you're probably not going to be that techy, that tech savvy, and that open to learning how to use a tablet that you've never used before or something, probably [C19]</i></p> <p><i>They would need access to the technology... do they have the internet, do they have a connection, do they have a smart device, do they have a way that they can use that and are they familiar with their platform... a prime example is SKYPE. iPhone users tend to use Facetime so do they have a SKYPE account, are they able to set it up? I think it's that accessibility, and it's have they used it before which is a big thing... [PC2]</i></p>         |
| Social capacity   | Support available through social network       | <p><i>I have a husband who does lots of stuff for me... I can't do housework because I can't lift an iron anymore [P4]</i></p> <p><i>Without that group, I think I would just be in bits right now to be honest. [P14]</i></p>                                                                                                                                                                                                                                                                                                                                                                                                                                                                                                     | <p><i>This lady, who I was talking about just before, she lived by herself and she hasn't got any carers but the family was helping [C2]</i></p> <p><i>More patients are having their family members helping them with these things at home and that visit regularly. There's no reason why that can't be - if they're turning up to help them put on TED stockings, then I'm sure they can help them turn on a tablet and watch something [C5]</i></p>                                                                                                                                                                                                                                                       |
| Healthcare system | Sources of healthcare capacity                 | <p><i>I think it's emotional support as well. I suppose in my case because I've had so many mental issues attached to my disorder, I have found support here from an orthopaedic point of view. When I had a setback and I was told there was a potential another infection in my bone I went to pieces here, and I saw [anonymised]. He was so reassuring... I know I've got security because I feel [anonymised] knows my case so well, and he knows what happened [P10]</i></p> <p><i>it's difficult for me, I can't use the underground or anything like that so I use the patient transport and they fetch me... some of those appointments have been 10 minutes or so and I have used the patient transport... [PP2]</i></p> | <p><i>But the skill then is to watch your language and rather than tell someone how easy it is, or tell someone the solution, again that's where motivational interviewing comes in. Rather than saying but you can just pace, let's work out how you can pace, say something like is there anything that you've been learning that you feel could give some boundaries there or anything you've tried? So again, you're getting the person to solve their own problems [C13]</i></p> <p><i>Sometimes the hospital transports are not quite helpful for them. They don't come on time, so they delay sometimes. She ends up missing her appointment because of a delay in the hospital transport [C2]</i></p> |

## Discussion

This paper outlines four key factors and describes mechanisms that influence patient preferences in the context of VC for orthopaedic rehabilitation. These factors have been empirically derived. These factors have been identified and characterised, and can be mapped as an explanatory model that demonstrates the interplay between factors and how they interact to influence preferences.

Figure 2: model to illustrate interactions between mechanisms that influence preference for virtual consultations

### (a) The relationship between *Situation of care* and *Expectations of care*

The situation informs the patient's expectations of care. If the situation demands F2F (or VC) the patient will be required to decide whether F2F (or VC) would be the most suitable alternative based on the care they expect to receive. These expectations influences the situation of care for the patient.

### (b) The relationship between *Situation of care* and *Demands of care*

The situation requires the patient to perform specific tasks to engage in their care. These demands will fluctuate as the clinical status and the treatment requirements fluctuate. The availability of the care pathway may remain fixed or fluid dependent on the specific situation. Resources available through capacity will dictate the demands of the situation. Competing demands on the patient may reduce available capacity to complete the demands of care dictated by the situation. The demands on the patient, and their interaction with the patient's capacity in turn influences the situation.

### (c) The relationship between *Situation of care* and *Capacity to allocate resources to care*

Patient capacity influences patient expectations indirectly via the demands and expectations of care. In addition; the capacity of the patient to engage with care itself can influence the situation as resources may be allocated to the patient by the healthcare provider depending on a need's basis, for example, whether a patient qualifies for hospital funded transport. The capacity of the patient to engage with care is therefore directly dependent on the situation.

### (d) The consequences of *Preference*

The preferred choice between a F2F and a VC has consequences. The consequences of choice directly impact on the demands of the patient and their expectations of care. Changes in expectations and demand in turn influence the patient's capacity and the situation.

### (e) The formation of *Preference*

The formation of preference, within this study, is the resulting process of complex factors interacting with one another. The establishment of the situation and capacity dictate the expectations and demands of care. Preferences are established following a total (considering the options available) subjective comparative (these options are compared based on the patient's experience) evaluation (the option with the most utility is selected).

1  
2  
3 A total subjective comparative evaluation is a cognitively demanding task<sup>12</sup>. We have found, from  
4 this research that multiple factors are at play that combine and compete. To ask sensitising  
5 questions in relation to these factors may facilitate the cognitively demanding task of preference  
6 formation. These results can therefore be applied to clinical care in the form of sensitising  
7 questions for clinicians to ask patients to support formation of preferences for or against F2F (or  
8 VC). These questions have been developed from the results of this study are demonstrated in  
9 table 3 and are suitably generic; they can be applied across all areas of healthcare as they are not  
10 limited to orthopaedic rehabilitation. Illustrations with sensitising questions (image 1 = situation  
11 of care, image 2 = expectations of care, image 3 = capacity to allocate resources to care, image 4 =  
12 demands of care) are presented within the supplementary materials.  
13  
14  
15  
16  
17  
18  
19  
20  
21  
22  
23  
24  
25  
26  
27  
28  
29  
30  
31  
32  
33  
34  
35  
36  
37  
38  
39  
40  
41  
42  
43  
44  
45  
46  
47  
48  
49  
50  
51  
52  
53  
54  
55  
56  
57  
58  
59  
60

For peer review only

Table 3: Practical questions to support formation of preference

| Theme                | Factor                 | Description                                                                                                                                        | Practical questions to support identification of preference for patients                                                                                                                         | Practical questions for clinicians to ask patients to support identification of preference                                                                                                  |
|----------------------|------------------------|----------------------------------------------------------------------------------------------------------------------------------------------------|--------------------------------------------------------------------------------------------------------------------------------------------------------------------------------------------------|---------------------------------------------------------------------------------------------------------------------------------------------------------------------------------------------|
| Situation of care    | Clinical status        | The healthcare complaint the patient experiences, its stability, reversibility and its impact on the patient in conjunction with other complaints. | <ul style="list-style-type: none"> <li>Does my problem require me to be seen in person?</li> <li>Would having a VC make things easier for me?</li> </ul>                                         | <ul style="list-style-type: none"> <li>Does your problem require you to be seen in person?</li> <li>Would having a VC make things easier for you?</li> </ul>                                |
|                      | Treatment requirements | The treatment and management of the complaint that is required. The restrictions imposed on the patient.                                           | <ul style="list-style-type: none"> <li>Do I think the treatment I require can be delivered virtually?</li> </ul>                                                                                 | <ul style="list-style-type: none"> <li>Do you think the treatment you require can be delivered virtually?</li> </ul>                                                                        |
|                      | Care Pathway           | The availability of healthcare to the patient                                                                                                      | <ul style="list-style-type: none"> <li>What do I need from my clinician to support me with a F2F or VC?</li> </ul>                                                                               | <ul style="list-style-type: none"> <li>What can I do to support you with a F2F or VC?</li> </ul>                                                                                            |
| Expectations of care | Desire for contact     | Whether the patient / healthcare professional believes the F2F is more of a capable method of care delivery than VC.                               | <ul style="list-style-type: none"> <li>Do I think my issue can be best managed by F2F / VC?</li> <li>Does my healthcare professional think my issue can be best managed by F2F or VC?</li> </ul> | <ul style="list-style-type: none"> <li>Do you think your issue could be best managed by F2F / VC?</li> <li>Do you believe I think your issue could be best managed by F2F or VC?</li> </ul> |
|                      | Psychological status   | The psychological status of the patient and the impact of this on care across different delivery formats.                                          | <ul style="list-style-type: none"> <li>How would using VC affect me?</li> <li>Am I comfortable seeing myself on a screen?</li> </ul>                                                             | <ul style="list-style-type: none"> <li>How would using VC affect you?</li> <li>Would you be comfortable seeing yourself on a screen?</li> </ul>                                             |
|                      | Previous care          | Experience of previous care                                                                                                                        | <ul style="list-style-type: none"> <li>How could my previous care have been managed using F2F or VC?</li> </ul>                                                                                  | <ul style="list-style-type: none"> <li>Do you think your previous care could have been successfully managed using F2F or VC?</li> </ul>                                                     |
|                      | Perceived requirements | The negotiated requirements of the session                                                                                                         | <ul style="list-style-type: none"> <li>What treatment do I think I need?</li> <li>Can this be achieved by F2F or VC?</li> </ul>                                                                  | <ul style="list-style-type: none"> <li>What treatment do you think need?</li> <li>Can this be achieved by F2F or VC?</li> </ul>                                                             |
| Demands of care      | Care requirements      | The requirements of care                                                                                                                           | <ul style="list-style-type: none"> <li>What do I need to during my rehab?</li> <li>Can I achieve this?</li> </ul>                                                                                | <ul style="list-style-type: none"> <li>What does your care require of you?</li> <li>Can you achieve this?</li> </ul>                                                                        |
|                      | Social demands         | The competing life demands that can interfere with healthcare.                                                                                     | <ul style="list-style-type: none"> <li>What other things do I need to do that might get in the way of a F2F or VC?</li> </ul>                                                                    | <ul style="list-style-type: none"> <li>What other things do I need to do that might get in the way of a F2F / VC?</li> </ul>                                                                |



1  
2  
3  
4  
5  
6  
7  
8  
9  
10  
11  
12  
13  
14  
15  
16  
17  
18  
19  
20  
21  
22  
23  
24  
25  
26  
27  
28  
29  
30  
31  
32  
33  
34  
35  
36  
37  
38  
39  
40  
41  
42  
43  
44  
45  
46

|                                        | Consequences of choice | The impact of choice                           | <ul style="list-style-type: none"> <li>What would I have to do if you chose a F2F or VC?</li> </ul>                                            | <ul style="list-style-type: none"> <li>What would you have to do if you chose a F2F / VC?</li> </ul>                                                       |
|----------------------------------------|------------------------|------------------------------------------------|------------------------------------------------------------------------------------------------------------------------------------------------|------------------------------------------------------------------------------------------------------------------------------------------------------------|
| Capacity to allocate resources to care | Financial              | The ability to free up financial resources     | <ul style="list-style-type: none"> <li>What would the financial impact be for me if I choose a F2F / VC?</li> </ul>                            | <ul style="list-style-type: none"> <li>What would the financial impact be for you if you chose a F2F or VC?</li> </ul>                                     |
|                                        | Infrastructure         | Access to material and informational resources | <ul style="list-style-type: none"> <li>Do I have access to what I need to have a F2F or VC?</li> <li>Do I understand how use these?</li> </ul> | <ul style="list-style-type: none"> <li>Do you have access to what you need to have a F2F or VC?</li> <li>Do you understand how to manage these?</li> </ul> |
|                                        | Social capacity        | Support available through social network       | <ul style="list-style-type: none"> <li>Do I have anyone who could support me with a F2F or VC?</li> </ul>                                      | <ul style="list-style-type: none"> <li>Do you have anyone who could support you with a F2F or VC?</li> </ul>                                               |
|                                        | Healthcare system      | Sources of healthcare capacity                 | <ul style="list-style-type: none"> <li>How can my healthcare professionals support me to access your care?</li> </ul>                          | <ul style="list-style-type: none"> <li>How can your healthcare professionals support you to access your care?</li> </ul>                                   |

F2F – face to face consultation; VC – virtual consultation

## Results in context

Burden of treatment theory<sup>24</sup> and the cumulative complexity model<sup>19</sup> both focus on the relationship between the workload demands on the patient with the patients capacity to do the work. Our previous research<sup>15</sup> hypothesised that the work of being a patient influences preference; patients may prefer the least burdensome option when giving the choice between a F2F and VC.

This current paper extends our previous model of patient preferences adding in: the situation of care, patient's expectations of care and patients ability to allocate resources to care (see Figure 2). Some patients find the process of F2F attendance burdensome. Despite this, some of these patients preferred to receive hands on manipulation. Some patients were prepared to tolerate burden as part of a process that offered them F2F care they believed was superior to a VC. In addition, some patients perceived the consequences of choosing a F2F (or VC) would significantly impact on their overall experience of care, both positive or negative. Additionally, factors such as confidentiality in VC and trustworthiness<sup>27</sup> may influence expectations of care. The model within this paper clearly demonstrates additional factors relating to BoT are likely to influence their preference. The option that best meets patients' expectations of care influences preferences.

Some patients discussed the situational nature of their problem and how their preferences may have been different under different circumstances. This is in accord with our qualitative study of acceptability for rehabilitation consultations<sup>14</sup>. Greenhalgh et al<sup>10</sup> found that videoconferencing using SKYPE was useful to access hard to reach patients and that avoiding long journeys to access care was beneficial. Not travelling can reduce healthcare costs<sup>28</sup> and the need for family to accompany patients on their journey<sup>14</sup>. Patients without the support of their families in our study found this to be beneficial. Kaambwa et al<sup>13</sup> found that patients had strong preferences for VCs when their clinic was between 15-100km away and when their use reduced costs. The dynamics between the situation and the patient's capacity for care create a unique state of affairs for each patient at the time of being offered the choice between consultations. These factors directly influence the patients burden and expectations of care. Consideration of these factors, and identification of the option with the most utility to the patient, will influence preferences.

This study is separated from many others (e.g. in primary care<sup>29</sup> and psychiatry<sup>30</sup> studies) because orthopaedic rehabilitation often requires 'hands on' care which is not possible virtually. The lack of touch over VC can inhibit patients experience of receiving care, particularly when they desire it<sup>31</sup>. Patients in the PhysioDirect study of telephone consultations still wanted to have 'proper' F2F physio<sup>32</sup>. VC has been seen as 'impersonal'<sup>33</sup> and can reduce emotional bonding between the patient and healthcare professional<sup>31</sup>.

A common theme in our data was the negative psychological impact some patients felt seeing themselves through a screen. This was in accord with a patient in the Jansen-Kasterink study<sup>33</sup> who reported: *'I cannot imagine seeing myself on video, I already have trouble seeing myself in a picture'*. Some patients for whom this was not a problem, however, found that being in their own environment and avoiding travel made them feel more relaxed<sup>10</sup> which could in itself improve patient-healthcare professional relationships. If offered the choice of a F2F or VC, patients need to give consideration to the alternatives; the actions, the state of affairs and the consequences of

1  
2  
3 choosing each alternative. The present research does not suggest how *much* the highlighted  
4 factors influences preferences or compete and compete with each other. This study will inform  
5 the design of a Discrete Choice Experiment, a deductive investigation to quantitatively measure  
6 how each factor influences preferences for patients in a pragmatic real-world scenario. A  
7 thorough understanding of the effect and influence of preferences will enable patient-centered  
8 service design.  
9  
10

11  
12  
13 However, the results of this study should be interpreted in light of their limitations. It was  
14 conducted at a single center and may not translate to other clinical areas. To overcome this,  
15 variation across participants was sought and attention focused towards more general factors to  
16 allow for transportability to other clinical settings. . The lead researcher (AG) is a healthcare  
17 professional within the centre which could have led to bias results through local familiarity. To  
18 limit this, patients who had a previous existing relationship with AWG were excluded from the  
19 study as per the exclusion criteria. It was not possible, however, to exclude clinical staff, most of  
20 whom were known to AG. This was taken into account in the data analysis through a process of  
21 defamiliarisation; attributions for each data point were orientated into a taxonomy to facilitate  
22 model development. Raw interview data was used to illustrate the model.  
23  
24  
25

### 26 Potential impact of Covid-19 pandemic on the future of virtual consultations

27  
28  
29 The empirical data collection for this research was conducted prior to the COVID-19 pandemic.  
30 The COVID-19 pandemic has accelerated the introduction of VC across healthcare. The rapid  
31 implementation of VC<sup>9</sup> may shape the future of this work in a way that was not previously  
32 anticipated. The COVID-19 'situation' has influenced an increased uptake of VC in practice. Whilst  
33 this research did not formally collect data regarding previous experience of VC (even in a different  
34 setting), future research should explore patient and clinician experience of using VC for healthcare  
35 consultations. Further research evaluating the use of VC during the COVID-19 pandemic will  
36 support future service redesign.  
37  
38  
39

## 40 **Conclusions**

41  
42  
43 We conducted 44 qualitative interviews to gain a thorough understanding of the mechanisms that  
44 influence patient preference. Multiple factors were identified: the situation (the ways that  
45 patients understand and explain their clinical status, their treatment requirements, and the care  
46 pathway), the expectations of care (influenced by a patients desire for contact, psychological  
47 status, previous care and perceived requirements), the demand (of care, of each patients  
48 respective social situation and the consequences of choice) and the capacity (the patient's ability  
49 to allocate resources to care; these include financial, infrastructural, social and healthcare  
50 resources). Factors may combine or compete with each other to influence preference. The  
51 patient's situation is dynamic and therefore preferences must also be dynamic. The formation of  
52 preference is cognitively demanding and sensitising questions may support patients to identify  
53 their preferred consultation format. This research illuminates the factors that appear to influence  
54 preference for patients. This is important for healthcare professionals; an understanding of  
55 preferences is essential to support the design of patient care pathways incorporating virtual  
56  
57  
58  
59  
60

1  
2  
3 consultations. The dynamic model presented here can be used to inform quantitative studies such  
4 as discrete choice experiments, and could act as a programme theory to inform future trials.  
5  
6  
7  
8  
9

10 **4481 excl tables**  
11  
12  
13  
14  
15  
16  
17  
18  
19  
20  
21  
22  
23  
24  
25  
26  
27  
28  
29  
30  
31  
32  
33  
34  
35  
36  
37  
38  
39  
40  
41  
42  
43  
44  
45  
46  
47  
48  
49  
50  
51  
52  
53  
54  
55  
56  
57  
58  
59  
60

For peer review only

## Abbreviations

BoT – Burden of Treatment Theory

CONNECT (Project) – Care in Orthopaedics, burdeN of treatmeNt and the Effect of Communication Technology

F2F – face-to-face care

VC – virtual consultation

## Declarations

### Ethics approval and consent to participate

Ethical approval was received for this study (Approval received 4<sup>th</sup> December 2018 from the South Central-Oxford C Research Ethics Committee [IRAS ID: 255172, REC Reference 18/SC/0663]). All participants were provided with a participant information sheet and given at least 24 hours to consider the information and ask questions before being recruited into the study. All participants provided informed, written consent prior to enrolment.

### Availability of data and materials

Data are available upon reasonable request from the corresponding author.

### Competing interests

None to declare

### Funding

Anthony Gilbert is funded by a National Institute for Health Research (NIHR), Clinical Doctoral Research Fellowship for this research project (ICA-CDRF-2017-03-025). Anthony Gilbert and Carl May are supported by the National Institute for Health Research ARC North Thames. The views expressed in this publication are those of the author(s) and not necessarily those of the National Institute for Health Research or the Department of Health and Social Care.

### Authors' contributions

AWG wrote the paper and conceived the project with CRM, JJ and MS. CRM guided qualitative data collection. AWG conducted all the interviews. CRM assisted with data analysis, and with AWG developed the model. CRM, JJ and MS edited and critically revised the paper. All authors have read and approved the manuscript. AWG is the guarantor of the manuscript.

### Acknowledgements

The authors thank members of the CONNECT Project Patient and Public Involvement steering group for their invaluable contributions to the overall study design of the CONNECT Project and obtaining funding for the PhD Fellowship. The authors also thank John Doyle, Anju Jaggi, Iva Hauptmannova and colleagues within the Therapies Directorate and Research and Innovation

1  
2  
3 Centre at the Royal National Orthopaedic Hospital for their ongoing support. The authors are  
4 grateful to the patients and members of staff who participated in this study.  
5  
6  
7  
8  
9  
10  
11  
12  
13  
14  
15  
16  
17  
18  
19  
20  
21  
22  
23  
24  
25  
26  
27  
28  
29  
30  
31  
32  
33  
34  
35  
36  
37  
38  
39  
40  
41  
42  
43  
44  
45  
46  
47  
48  
49  
50  
51  
52  
53  
54  
55  
56  
57  
58  
59  
60

For peer review only

## References

1. Health BCMo. Primary and Community Care in BC: A Strategic Policy Framework 2015 [Available from: <https://www.health.gov.bc.ca/library/publications/year/2015/primary-and-community-care-policy-paper.pdf> accessed 28th February 2020 2020.
2. Australia GUT. Financial Incentives for Telehealth Canberra, AU2012 [Available from: [https://gp2u.com.au/static/documents/Telehealth\\_Program\\_Guidelines\\_effective\\_1\\_July\\_2012.pdf](https://gp2u.com.au/static/documents/Telehealth_Program_Guidelines_effective_1_July_2012.pdf) accessed 28th February 2020.
3. NHS. The NHS Long Term Plan. In: Health Do, ed. Online, 2019.
4. Garber S, Gates SM, Keeler EB, et al. Redirecting Innovation in U.S. Health Care: Options to Decrease Spending and Increase Value. *Rand Health Quarterly* 2014;4(1):3-3.
5. Mahendradhata Y, Trisnantoro L, Listyadewi S, et al. The Republic of Indonesia health system review: Health Systems in Transition; 2017  
[<https://apps.who.int/iris/bitstream/handle/10665/254716/9789290225164-eng.pdf;sequence=1>]. Available from: <https://apps.who.int/iris/bitstream/handle/10665/254716/9789290225164-eng.pdf> accessed 16th December 2019.
6. Armfield NR, Bradford M, Bradford NK. The clinical use of Skype—For which patients, with which problems and in which settings? A snapshot review of the literature. *International Journal of Medical Informatics* 2015;84(10):737-42. doi: 10.1016/j.ijmedinf.2015.06.006
7. Greenhalgh T, Koh GCH, Car J. Covid-19: a remote assessment in primary care. *BMJ (Clinical research ed)* 2020;368:m1182. doi: 10.1136/bmj.m1182
8. Greenhalgh T, Wherton J, Shaw S, et al. Video consultations for covid-19. *BMJ (Clinical research ed)* 2020;368:m998. doi: 10.1136/bmj.m998
9. Gilbert A, Billany J, Adam R, et al. Rapid implementation of virtual clinics due to COVID-19: Report and early evaluation of a Quality Improvement initiative. *BMJ Open Quality* 2020;[Accepted ahead of print]
10. Greenhalgh T, Shaw S, Vijayaraghavan S, et al. Real-world implementation of video outpatient consultations at macro, meso, and micro levels: Mixed-method study. *Journal of Medical Internet Research* 2018;20(4) doi: 10.2196/jmir.9897
11. Mair F, May C, O'Donnell C, et al. Factors that promote or inhibit the implementation of e-health systems: an explanatory systematic review. *Bulletin of the World Health Organization* 2012;90:357-64. doi: doi: 10.2471/BLT.11.099424
12. Hausman DM. Preference, Value, Choice, and Welfare: Cambridge University Press 2012.
13. Kaambwa B, Ratcliffe J, Shulver W, et al. Investigating the preferences of older people for telehealth as a new model of health care service delivery: A discrete choice experiment. *Journal of Telemedicine and Telecare* 2016;23(2):301-13. doi: 10.1177/1357633X16637725
14. Gilbert AW, Jaggi A, May CR. What is the acceptability of real time 1:1 videoconferencing between clinicians and patients for a follow-up consultation for multi-directional shoulder instability? *Shoulder & Elbow* 2019;11(1):53-59. doi: 10.1177/1758573218796815
15. Gilbert A, Jones J, Jaggi A, et al. Use of virtual consultations in an orthopaedic rehabilitation setting: how do changes in the work of being a patient influence patient preferences? A systematic review and qualitative synthesis. *BMJ Open* 2020;10:e036197. doi: 10.1136/bmjopen-2019-036197
16. Gilbert AW, Jaggi A, May CR. What is the patient acceptability of real time 1:1 videoconferencing in an orthopaedics setting? A systematic review. *Physiotherapy (United Kingdom)* 2018;104(2):178-86. doi: 10.1016/j.physio.2017.11.217
17. Lippiett KA, Richardson A, Myall M, et al. Patients and informal caregivers' experiences of burden of treatment in lung cancer and chronic obstructive pulmonary disease (COPD): a systematic review and synthesis of qualitative research. *BMJ Open* 2019;9(2):e020515-e15. doi: 10.1136/bmjopen-2017-020515
18. Gallacher K, I., May C, R., Langhorne P, et al. A conceptual model of treatment burden and patient capacity in stroke. *BMC Family Practice* 2018(19):9. doi: 10.1186/s12875-017-0691-4

19. Shippee ND, Allen SV, Leppin AL, et al. Attaining minimally disruptive medicine: Context, challenges and a roadmap for implementation. *Journal of the Royal College of Physicians of Edinburgh* 2015;45(2):118-22. doi: 10.4997/JRCPE.2015.206
20. Wall PDH, Sprowson AP, Parsons N, et al. Protocol for a single-centre randomised controlled trial of multimodal periarticular anaesthetic infiltration versus single-agent femoral nerve blockade as analgesia for total knee arthroplasty: Perioperative Analgesia for Knee Arthroplasty (PAKA). *BMJ Open* 2015;5(12):e009898-e98. doi: 10.1136/bmjopen-2015-009898
21. May C. Towards a general theory of implementation. *Implementation Science* 2013;8(1) doi: 10.1186/1748-5908-8-18
22. May C, Montori VM, Mair FS. We need minimally disruptive medicine. *BMJ: British Medical Journal* 2009;339(7719):485.
23. Gilbert A, Jones J, Stokes M, et al. Protocol for the CONNECT Project: a mixed methods study investigating patient preferences for communication technology use in orthopaedic rehabilitation consultations. *BMJ Open* 2019;9(12):e035210. doi: 10.1136/bmjopen-2019-035210
24. May CR, Hunt K, May CM, et al. Rethinking the patient: Using Burden of Treatment Theory to understand the changing dynamics of illness. *BMC Health Services Research* 2014;14(1) doi: 10.1186/1472-6963-14-281
25. Tavory I, Timmermans S. *Abductive Analysis: Theorizing Qualitative Research*. Chicago and London: University of Chicago Press 2014.
26. O'Brien BC, Harris IB, Beckman TJ, et al. Standards for reporting qualitative research: A synthesis of recommendations. *Academic Medicine* 2014;89(9):1245-51. doi: 10.1097/ACM.0000000000000388
27. Mark AH, Elizabeth D, Beiyao Z, et al. Trust in Physicians and Medical Institutions: What Is It, Can It Be Measured, and Does It Matter? *The Milbank Quarterly* 2001;79(4):613.
28. Powell RE, Henstenburg JM, Cooper G, et al. Patient perceptions of telehealth primary care video visits. *Annals of Family Medicine* 2017;15(3):225-29. doi: 10.1370/afm.2095
29. Donaghy E, Hammersley V, Bikker A, et al. Acceptability, benefits, and challenges of video consulting: A qualitative study in primary care. *British Journal of General Practice* 2019;69(686):E586-E94. doi: 10.3399/bjgp19X704141
30. Wynn R, Bergvik S, Pettersen G, et al. Clinicians' experiences with videoconferencing in psychiatry. *Studies in health technology and informatics* 2012;180:1218-20.
31. Cranen K, Drossaert CHC, Brinkman ES, et al. An exploration of chronic pain patients' perceptions of home telerehabilitation services. *Health Expectations* 2012;15(4):339-50. doi: 10.1111/j.1369-7625.2011.00668.x
32. Pearson J, Richardson J, Calnan M, et al. The acceptability to patients of PhysioDirect telephone assessment and advice services; a qualitative interview study, 2016.
33. Jansen-Kosterink S, In 't Veld RH, Hermens H, et al. A Telemedicine Service as Partial Replacement of Face-to-Face Physical Rehabilitation: The Relevance of Use. *Telemedicine Journal And E-Health: The Official Journal Of The American Telemedicine Association* 2015;21(10):808-13. doi: 10.1089/tmj.2014.0173



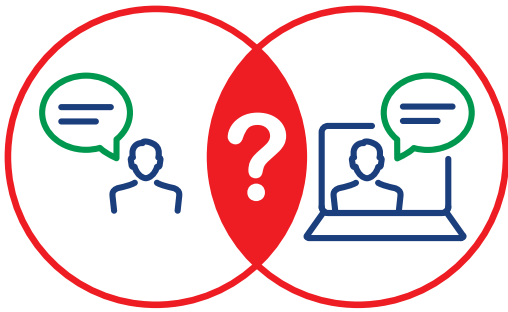

1  
2  
3  
4  
5  
6  
7  
8  
9  
10  
11  
12  
13  
14  
15  
16  
17  
18  
19  
20  
21  
22  
23  
24  
25  
26  
27  
28  
29  
30  
31  
32  
33  
34  
35  
36  
37  
38  
39  
40  
41  
42  
43  
44  
45  
46

# Questions to help you decide whether a virtual or face to face consultation is better for you.

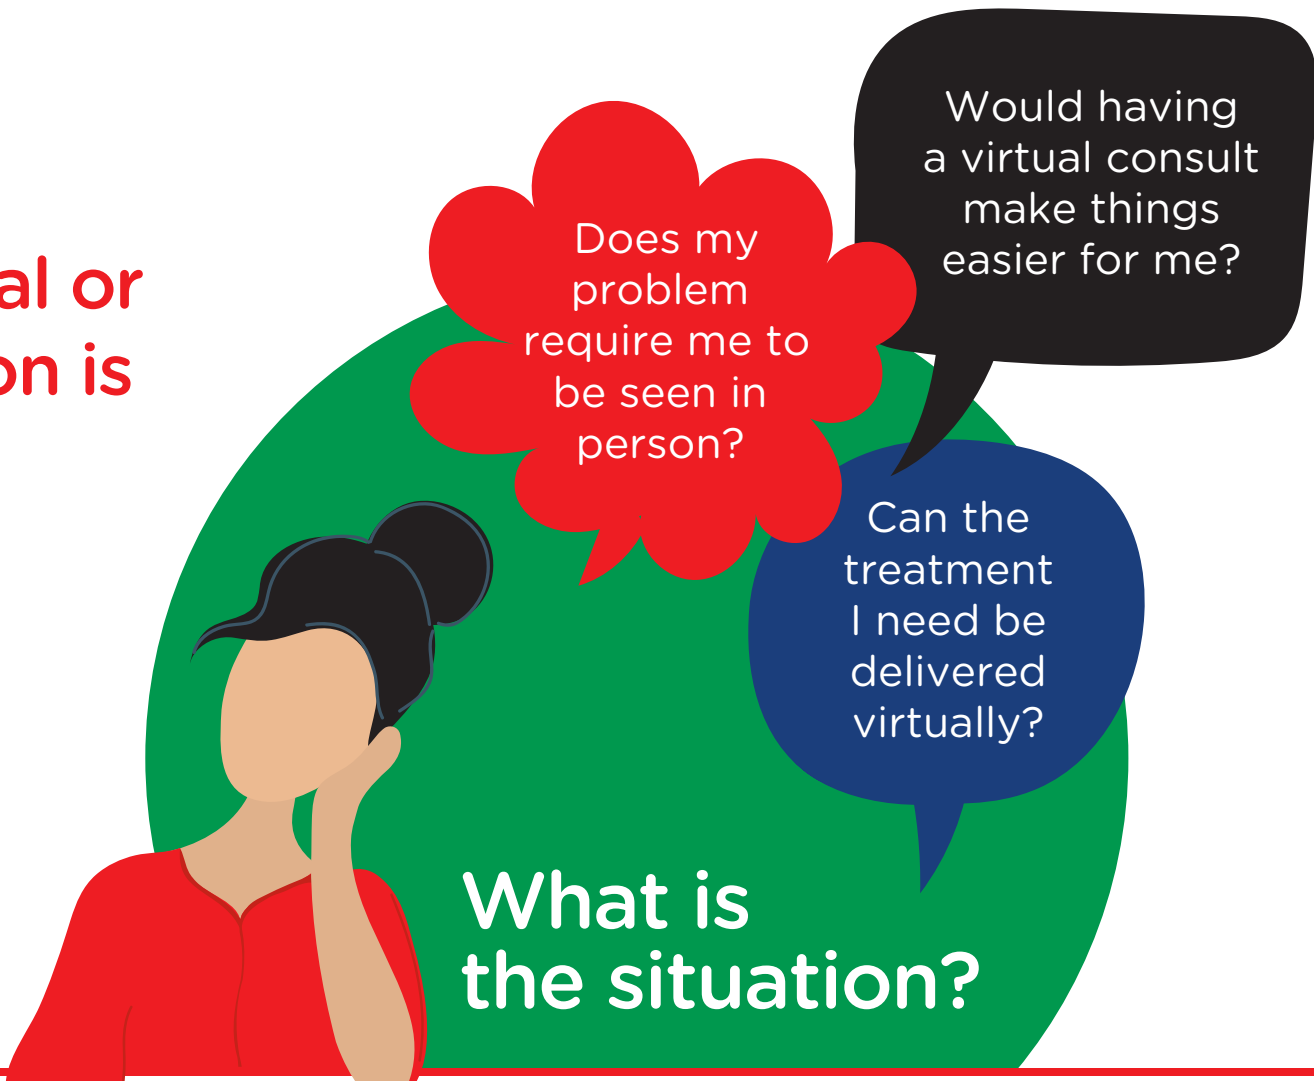

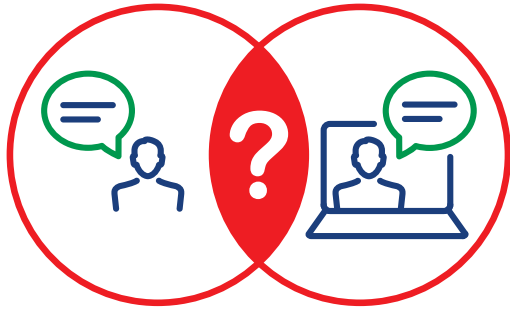

1  
2  
3  
4  
5  
6  
7  
8  
9  
10  
11  
12  
13  
14  
15  
16  
17  
18  
19  
20  
21  
22  
23  
24  
25  
26  
27  
28  
29  
30  
31  
32  
33  
34  
35  
36  
37  
38  
39

# Questions to help you decide whether a virtual or face to face consultation is better for you.

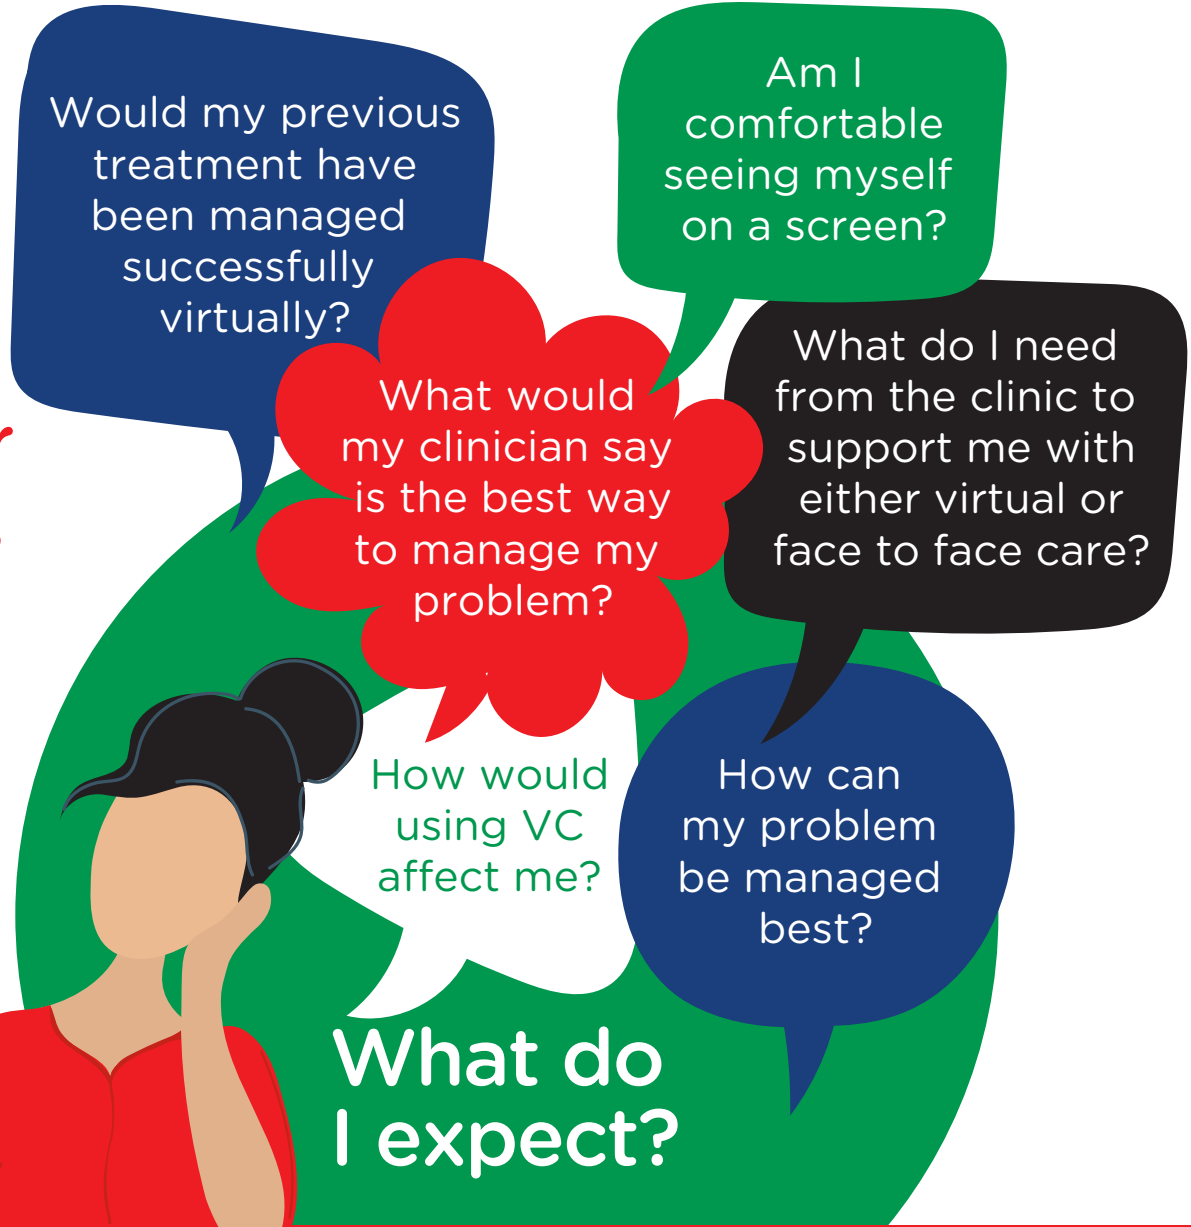

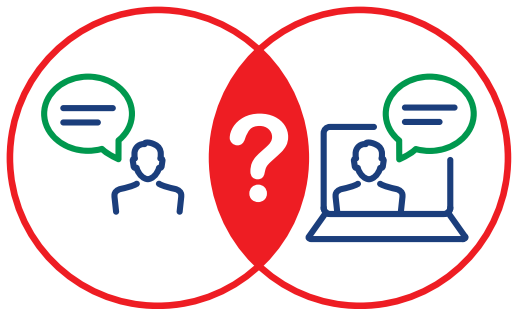

1  
2  
3  
4  
5  
6  
7  
8  
9  
10  
11  
12 **Questions to help you**  
13 **decide whether a virtual or**  
14 **face to face consultation is**  
15 **better for you.**  
16  
17  
18  
19  
20  
21  
22  
23  
24  
25  
26  
27  
28  
29  
30  
31  
32  
33  
34  
35  
36  
37  
38  
39

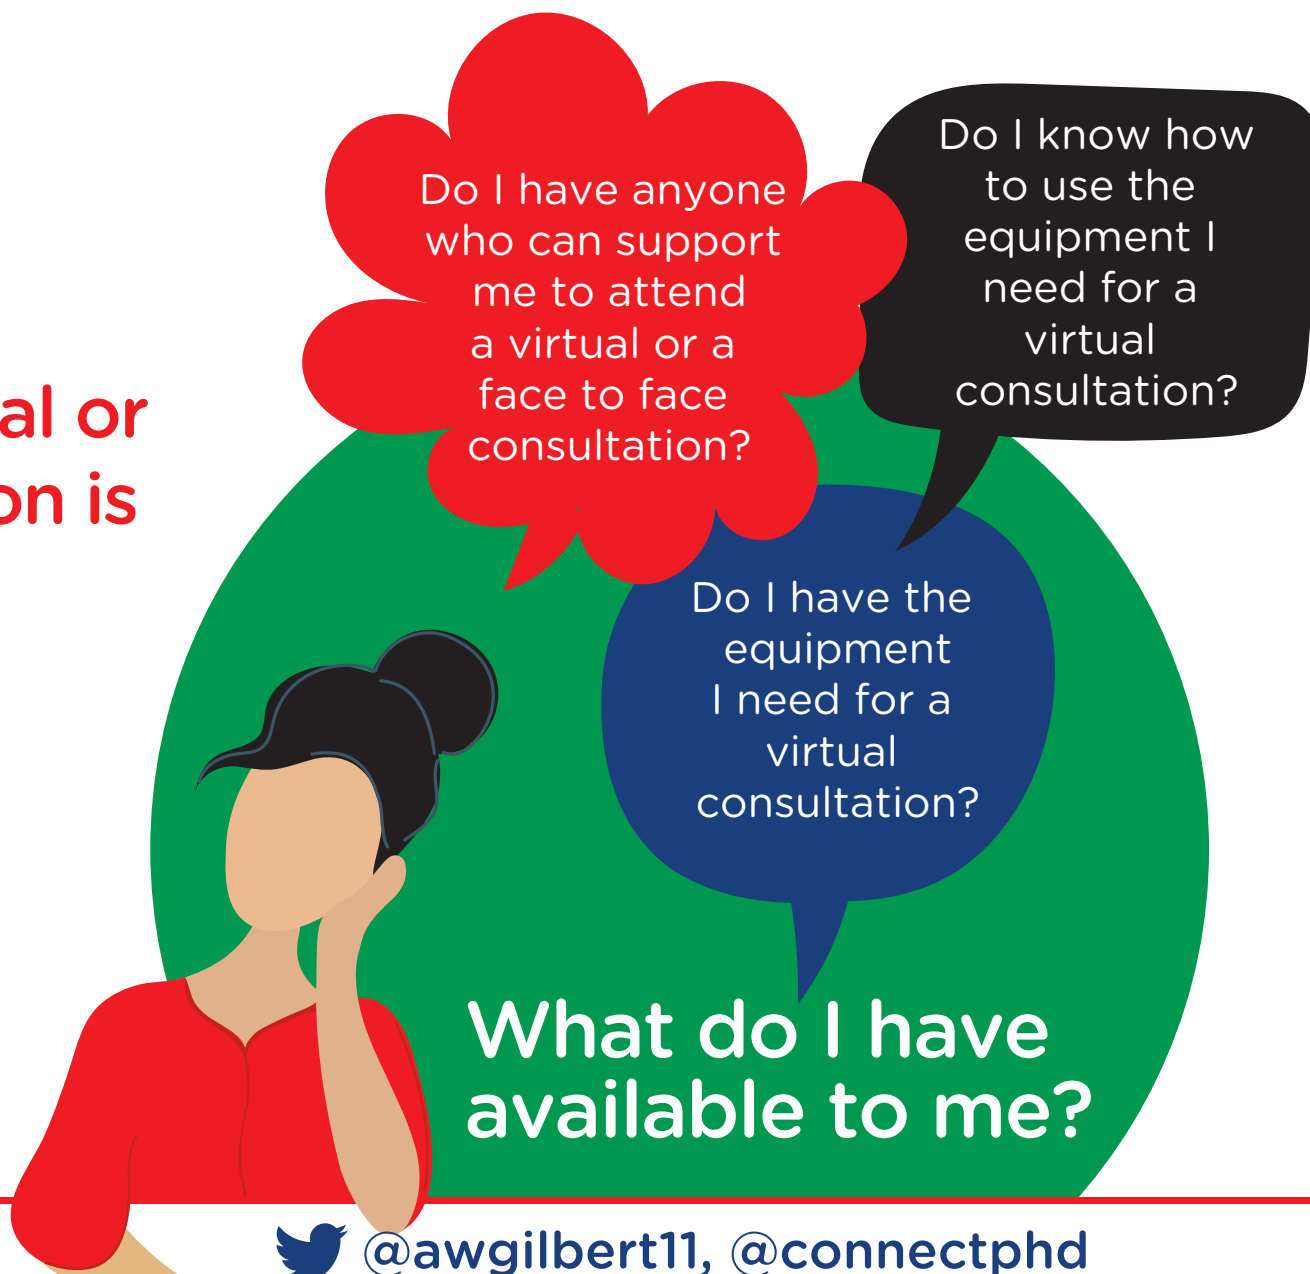



1  
2  
3  
4  
5  
6  
7  
8  
9  
10  
11  
12  
13  
14  
15  
16  
17  
18  
19  
20  
21  
22  
23  
24  
25  
26  
27  
28  
29  
30  
31  
32  
33  
34  
35  
36  
37  
38  
39

# Questions to help you decide whether a virtual or face to face consultation is better for you.

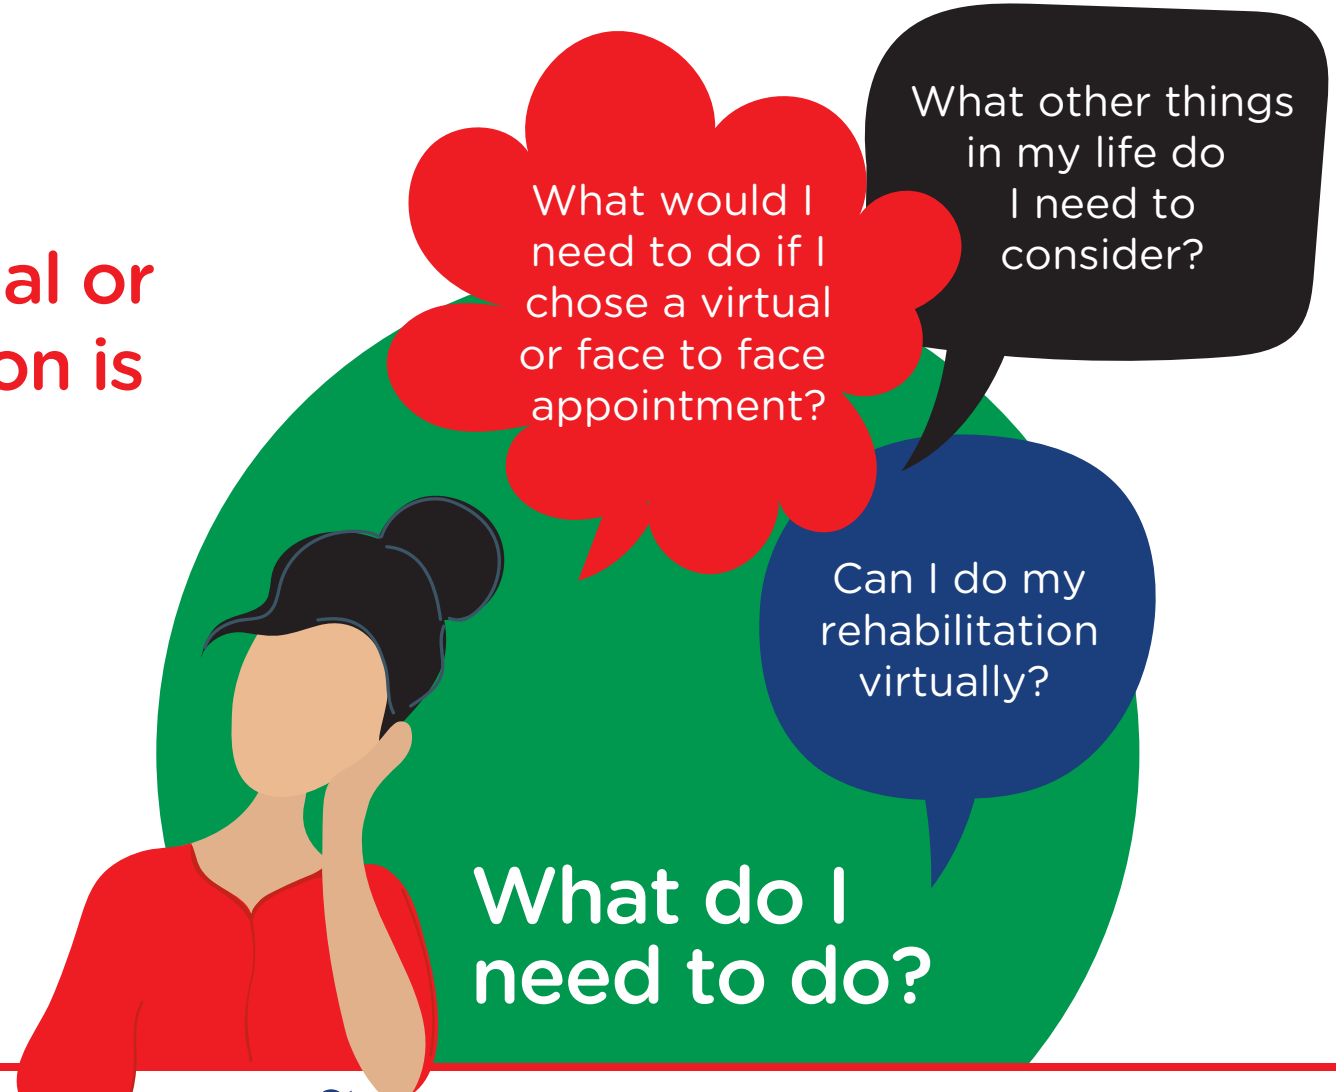

40  
41  
42  
43  
44  
45  
46

## What do I need to do?

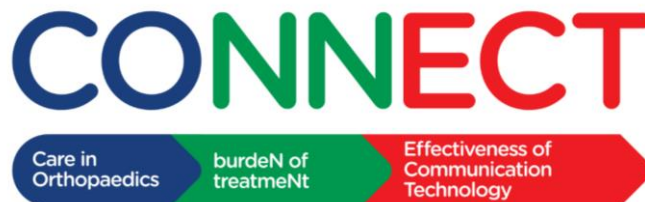

## CONNECT Project Patient Interview Schedule

### Part 1 – Burden of Treatment

- **Impact on Patient:** how technology consultations influence the experience of living with illness and engagement with clinical care

What was life like before you got your condition?

How does your condition affect you with daily life?

- Family
- Friends
- Work
- Hobbies
- Day to day activities and routine

Does anyone support you to manage your condition?

How do you manage your condition?

- Routine stuff
- Managing exacerbations

What medical services do you interact with, what for?

- Regularity?

How would using communication technology impact on how you manage your condition?



## Part 2 – Results of Phase 1

- **Skills:** what were needed, how were they gained, how were they enacted in practice.

*What skills do you think you would need in order to use Communication technology for your [physio / OT]? (Is there any difference between the two?)*

*Do you have the skills now? How would you get them? How could the RNOH support you to get them?*

*Describe how you think communication technology use would look in reality*

- **Clinical Interactions:** impact of technology consultations on clinical interactions

*What is the relationship like with you and your clinician now? Would it be different using communication technology? What could you still do? What couldn't you do? How would this make you feel?*

*How would it be with someone different? What would be 'a good person'. What would be a 'bad person'.*

- **Environment:** the location and resources required to engage with clinical rehabilitation

*What would you physically need to use communication technology? Where would you get it from? Where would you like to get it from (ie self-sourced or hospital sourced)*

*Where would you use it from? What space would you need to achieve the objectives of the consultation?*

- **Processes:** how technology consultations affect routine clinical practice

*What has your journey been as an RNOH patient (previous care, how they got referred, waiting time, experience of being a patient, dealing with other services?)*

*How would this change with using communication technology? Wat would be better? What would be worse?*



1  
2  
3  
4  
5  
6  
7  
8  
9  
10  
11  
12  
13  
14  
15  
16  
17  
18  
19  
20  
21  
22  
23  
24  
25  
26  
27  
28  
29  
30  
31  
32  
33  
34  
35  
36  
37  
38  
39  
40  
41  
42  
43  
44  
45  
46



## Part 3 – DCE Design

- **Preferences:** the potential patients see for technology as an alternative to routine face to face care

In what situations would you be happy to use technology?

In what situations would you not be happy to use?

What would use look like for you at the RNOH?

What would we need to consider? From a personal perspective? From others' perspective?

Anything you would like to add that might help the research?





## CONNECT Project Clinician Interview Schedule

### Part 1 – Burden of Treatment

- **Impact on Patient:** how technology consultations influence the experience of living with illness and engagement with clinical care

Can you give me examples of how patients' conditions affect their life? eg

- Family
- Friends
- Work
- Hobbies
- Day to day activities and routine

Do your patients need support to manage their condition?

How do patients manage their condition?

- Routine stuff
- Managing exacerbations

What medical services do your patients interact with, what for?

- Regularity?

How would using communication technology impact on how patients manage their conditions?



## Part 2 – Results of Phase 1

- **Skills:** what were needed, how were they gained, how were they enacted in practice.

*What skills do you think patients would need in order to use Communication technology for your [physio / OT]? (Is there any difference between the two?)*

*Do your patients have the skills now? How would they get them? How could the RNOH support them to get them?*

*Describe how you think communication technology use would look in reality*

- **Clinical Interactions:** impact of technology consultations on clinical interactions

*Would it be different using communication technology? What could you still do? What couldn't you do? How would this make your patients feel?*

*How would it be with someone different? What would be 'a good person'. What would be a 'bad person'.*

- **Environment:** the location and resources required to engage with clinical rehabilitation

*What would you physically need to use communication technology? Where would patients get it from? Where would they like to get it from (ie self-sourced or hospital sourced)*

*Where would they use it from? What space would they need to achieve the objectives of the consultation?*

- **Processes:** how technology consultations affect routine clinical practice

*Think of your patients pathway....  
(previous care, how they got referred, waiting time, experience of being a patient, dealing with other services?)*

*How would this change with using communication technology? What would be better? What would be worse?*

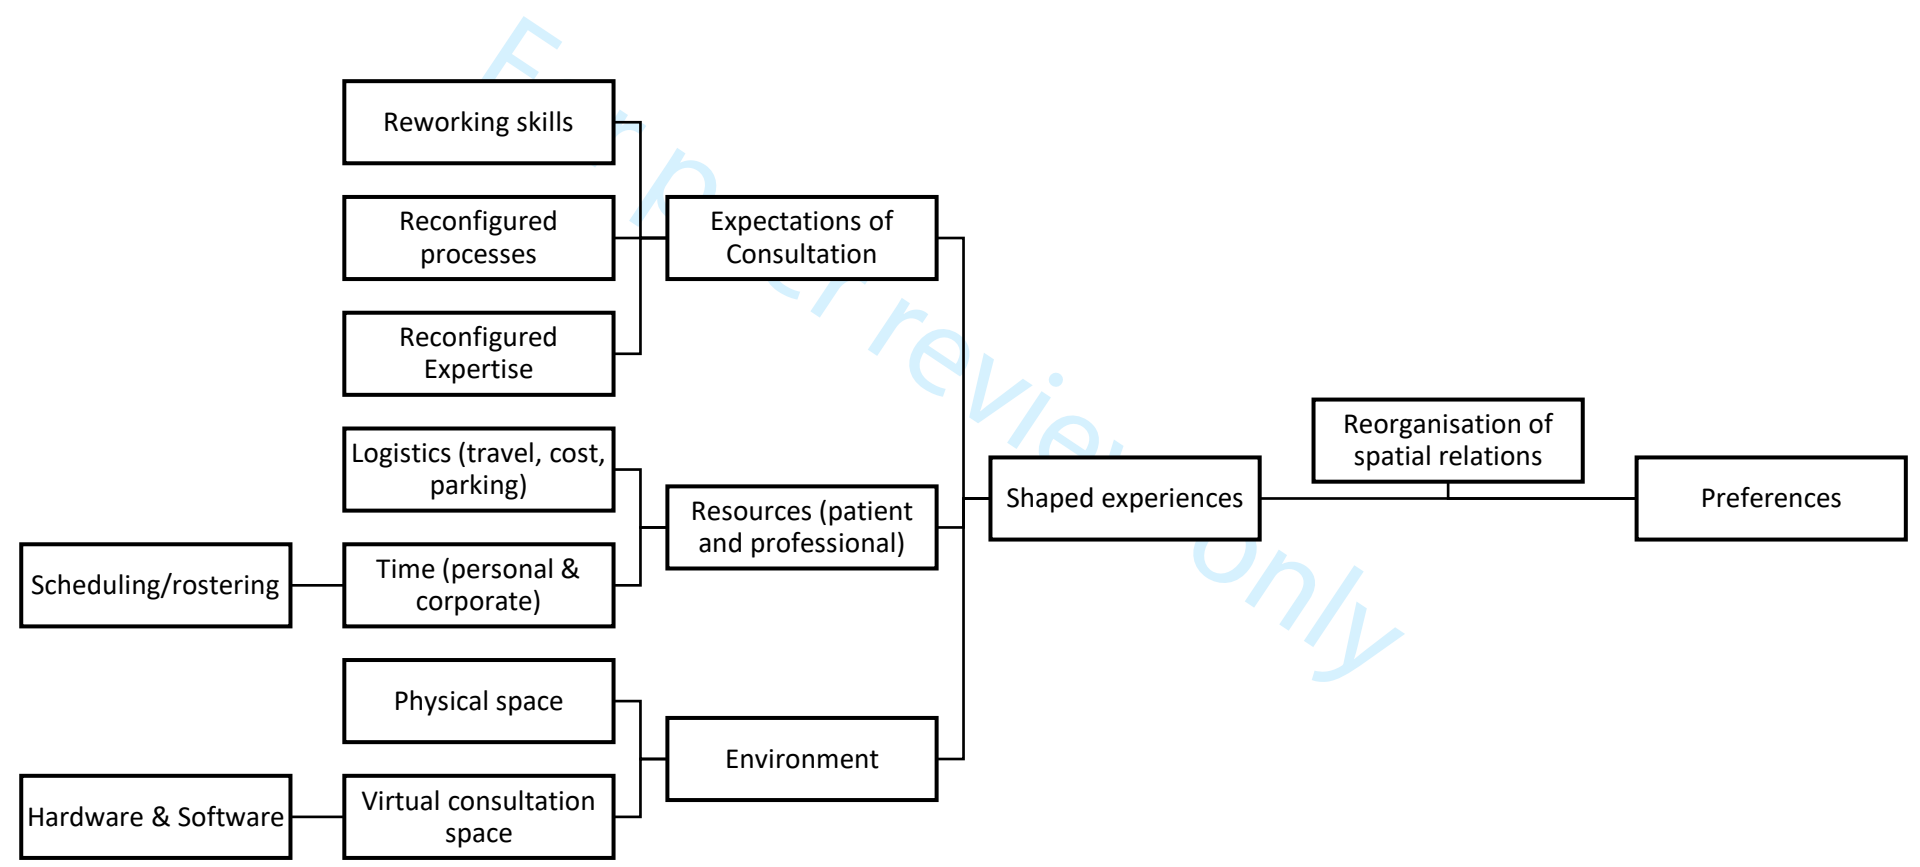

1  
2  
3  
4  
5  
6  
7  
8  
9  
10  
11  
12  
13  
14  
15  
16  
17  
18  
19  
20  
21  
22  
23  
24  
25  
26  
27  
28  
29  
30  
31  
32  
33  
34  
35  
36  
37  
38  
39  
40  
41  
42  
43  
44  
45  
46



## Part 3 – DCE Design

- Preferences: the potential patients see for technology as an alternative to routine face to face care

In what situations would patients be happy to use technology?

In what situations would patients not be happy to use?

What would use look like for you at the RNOH?

What would we need to consider? From a personal perspective? From others' perspective?

Anything you would like to add that might help the research?

## ID bmjopen-2020-041038 SRQR Checklist

|                                                    | <b>Item</b>                                                                                                                                                                                                                                                                                                                                                                                          | <b>Page</b> |
|----------------------------------------------------|------------------------------------------------------------------------------------------------------------------------------------------------------------------------------------------------------------------------------------------------------------------------------------------------------------------------------------------------------------------------------------------------------|-------------|
| <b>Title</b>                                       | Item 1. Title: Concise description of the nature and topic of the study. Identifying the study as qualitative or indicating the approach (e.g., ethnography, grounded theory) or data collection methods (e.g., interview, focus group) is recommended.                                                                                                                                              | page 1      |
| <b>Abstract</b>                                    | Item 2. Abstract: Summary of key elements of the study using the abstract format of the intended publication; typically includes background, purpose, methods, results, and conclusions.                                                                                                                                                                                                             | page 2      |
| <b>Problem Formulation</b>                         | Item 3. Problem Formulation: Description and significance of the problem/phenomenon studied; review of relevant theory and empirical work; problem statement.                                                                                                                                                                                                                                        | page 4      |
| <b>Purpose or research question</b>                | Item 4. Purpose or research question: Purpose of the study and specific objectives or questions.                                                                                                                                                                                                                                                                                                     | page 4      |
|                                                    | Item 5. Qualitative approach and research paradigm: Qualitative approach (e.g., ethnography, grounded theory, case study, phenomenology, narrative research) and guiding theory if appropriate; identifying the research paradigm (e.g., post-positivist, constructivist/interpretivist) is also recommended; rationale                                                                              | page 4      |
|                                                    | Item 6. Researcher characteristics and reflexivity: Researchers' characteristics that may influence the research, including personal attributes, qualifications/experience, relationship with participants, assumptions, and/or presuppositions; potential or actual interaction between researchers' characteristics and the research questions, approach, methods, results and/or transferability. | page 16     |
| <b>Context</b>                                     | Item 7. Context: Setting/site and salient contextual factors; rationale.                                                                                                                                                                                                                                                                                                                             | page 4      |
| <b>Sampling strategy</b>                           | Item 8. Sampling strategy: How and why research participants, documents, or events were selected; criteria for deciding when no further sampling was necessary (e.g., sampling saturation); rationale.                                                                                                                                                                                               | page 4      |
| <b>Ethical issues pertaining to human subjects</b> | Item 9. Ethical issues pertaining to human subjects: Documentation of approval by an appropriate ethics review board and participant consent, or explanation for lack thereof; other confidentiality and data security issues.                                                                                                                                                                       | page 18     |

|                                                     |                                                                                                                                                                                                                                                                                                                                                                                                               |                 |
|-----------------------------------------------------|---------------------------------------------------------------------------------------------------------------------------------------------------------------------------------------------------------------------------------------------------------------------------------------------------------------------------------------------------------------------------------------------------------------|-----------------|
|                                                     | Item 10. Data collection methods: Types of data collected; details of data collection procedures including (as appropriate) start and stop dates of data collection and analysis, iterative process, triangulation of sources/methods, and modification of procedures in response to evolving study findings; rationale.                                                                                      | page 4          |
| <b>Data collection instruments and technologies</b> | Item 11. Data collection instruments and technologies: Description of instruments (e.g., interview guides, questionnaires) and devices (e.g., audio recorders) used for data collection; if/how the instrument(s) changed over the course of the study.                                                                                                                                                       | page 4          |
| <b>Units of study</b>                               | Item 12. Units of study: Number and relevant characteristics of participants, documents, or events included in the study; level of participation.                                                                                                                                                                                                                                                             | page 5          |
| <b>Data processing</b>                              | Item 13. Data processing: Methods for processing data prior to and during analysis, including transcription, data entry, data management and security, verification of data integrity, data coding and anonymization / de-identification of excerpts.                                                                                                                                                         | pages 4 & 5     |
| <b>Data analysis</b>                                | Item 14. Data analysis: Process by which inferences, themes, etc. were identified and developed, including the researchers involved in data analysis; usually references a specific paradigm or approach; rationale.                                                                                                                                                                                          | pages 4 & 5     |
| <b>Techniques to enhance trustworthiness</b>        | Item 15. Techniques to enhance trustworthiness: Techniques to enhance trustworthiness and credibility of data analysis,(e.g., member checking, triangulation, audit trail); rationale                                                                                                                                                                                                                         | page 4          |
| <b>Synthesis and interpretation</b>                 | Item 16. Synthesis and interpretation: Main findings (e.g., interpretations, inferences, and themes); might include development of a theory or model, or integration with prior research or theory.                                                                                                                                                                                                           | pages 5 - 17    |
| <b>Links to empirical data</b>                      | Item 17. Links to empirical data: Evidence (e.g., quotes, field notes, text excerpts, photographs) to substantiate analytic findings.                                                                                                                                                                                                                                                                         | pages 7,9,11,13 |
|                                                     | Item 18. Integration with prior work, implications, transferability, and contribution(s) to the field: Short summary of main findings, explanation of how findings and conclusions connect to, support, elaborate on, or challenge conclusions of earlier scholarship; discussion of scope of application/generalizability; identification of unique contribution(s) to scholarship in a discipline or field. | page 17         |
| <b>Limitations</b>                                  | Item 19. Limitations: Trustworthiness and limitations of findings                                                                                                                                                                                                                                                                                                                                             | pages 16 & 17   |

|                              |                                                                                                                                                 |         |
|------------------------------|-------------------------------------------------------------------------------------------------------------------------------------------------|---------|
| <b>Conflicts of interest</b> | Item 20. Conflicts of interest: Potential sources of influence or perceived influence on study conduct and conclusions; how these were managed. | page 18 |
| <b>Funding</b>               | Item 21. Funding: Sources of funding and other support; role of funders in data collection, interpretation, and reporting.                      | page 18 |

For peer review only

# BMJ Open

## Factors that influence patient preferences for virtual consultations in an orthopaedic rehabilitation setting: a qualitative study

|                                 |                                                                                                                                                                                                                                                                                                                                                                                                                                   |
|---------------------------------|-----------------------------------------------------------------------------------------------------------------------------------------------------------------------------------------------------------------------------------------------------------------------------------------------------------------------------------------------------------------------------------------------------------------------------------|
| Journal:                        | <i>BMJ Open</i>                                                                                                                                                                                                                                                                                                                                                                                                                   |
| Manuscript ID                   | bmjopen-2020-041038.R3                                                                                                                                                                                                                                                                                                                                                                                                            |
| Article Type:                   | Original research                                                                                                                                                                                                                                                                                                                                                                                                                 |
| Date Submitted by the Author:   | 08-Feb-2021                                                                                                                                                                                                                                                                                                                                                                                                                       |
| Complete List of Authors:       | Gilbert, Anthony; Royal National Orthopaedic Hospital Stanmore, Therapies Department; University of Southampton, Faculty of Health Sciences<br>Jones, Jeremy; University of Southampton, Faculty of Health Sciences<br>Stokes, Maria; University of Southampton, Faculty of Health Sciences<br>May, Carl; London School of Hygiene and Tropical Medicine Faculty of Public Health and Policy; NIHR Applied Research Collaboration |
| <b>Primary Subject Heading</b>: | Health services research                                                                                                                                                                                                                                                                                                                                                                                                          |
| Secondary Subject Heading:      | Qualitative research                                                                                                                                                                                                                                                                                                                                                                                                              |
| Keywords:                       | QUALITATIVE RESEARCH, ORTHOPAEDIC & TRAUMA SURGERY, HEALTH SERVICES ADMINISTRATION & MANAGEMENT                                                                                                                                                                                                                                                                                                                                   |
|                                 |                                                                                                                                                                                                                                                                                                                                                                                                                                   |

SCHOLARONE™  
Manuscripts





I, the Submitting Author has the right to grant and does grant on behalf of all authors of the Work (as defined in the below author licence), an exclusive licence and/or a non-exclusive licence for contributions from authors who are: i) UK Crown employees; ii) where BMJ has agreed a CC-BY licence shall apply, and/or iii) in accordance with the terms applicable for US Federal Government officers or employees acting as part of their official duties; on a worldwide, perpetual, irrevocable, royalty-free basis to BMJ Publishing Group Ltd ("BMJ") its licensees and where the relevant Journal is co-owned by BMJ to the co-owners of the Journal, to publish the Work in this journal and any other BMJ products and to exploit all rights, as set out in our [licence](#).

The Submitting Author accepts and understands that any supply made under these terms is made by BMJ to the Submitting Author unless you are acting as an employee on behalf of your employer or a postgraduate student of an affiliated institution which is paying any applicable article publishing charge ("APC") for Open Access articles. Where the Submitting Author wishes to make the Work available on an Open Access basis (and intends to pay the relevant APC), the terms of reuse of such Open Access shall be governed by a Creative Commons licence – details of these licences and which [Creative Commons](#) licence will apply to this Work are set out in our licence referred to above.

Other than as permitted in any relevant BMJ Author's Self Archiving Policies, I confirm this Work has not been accepted for publication elsewhere, is not being considered for publication elsewhere and does not duplicate material already published. I confirm all authors consent to publication of this Work and authorise the granting of this licence.

# Factors that influence patient preferences for virtual consultations in an orthopaedic rehabilitation setting: a qualitative study

## Authors

1. Anthony W Gilbert<sup>1, 2, 3</sup>
2. Jeremy Jones<sup>2</sup>
3. Maria Stokes<sup>2,4</sup>
4. Carl R May<sup>3,5</sup>

## Author Affiliations

1. Therapies Department, Royal National Orthopaedic Hospital, Stanmore, UK.
2. School of Health Sciences, Faculty of Environmental and Life Sciences, University of Southampton, Southampton, UK
3. NIHR Applied Research Collaboration, North Thames.
4. NIHR Applied Research Collaboration, Wessex
5. Faculty of Public Health and Policy, London School of Hygiene and Tropical Medicine, London, UK

Corresponding author: Anthony Gilbert

Therapies Department

Royal National Orthopaedic Hospital

Stanmore

Middlesex

HA7 4LP

Tel: 02089095480

[anthony.gilbert@nhs.net](mailto:anthony.gilbert@nhs.net)

## Abstract

Objectives: To identify, characterize and explain factors that influence patient preferences, from the perspective of patients and clinicians, for virtual consultations in an orthopaedic rehabilitation setting.

Design: Qualitative study using semi-structured interviews and abductive analysis.

Setting: A physiotherapy and occupational therapy department situated within a tertiary orthopaedic centre in the UK.

Participants: Patients who were receiving orthopaedic rehabilitation for a musculoskeletal problem. Occupational therapists, physiotherapists or therapy technicians involved in the delivery of orthopaedic rehabilitation for patients with a musculoskeletal problem.

Results: Twenty-two patients and twenty-two healthcare professionals were interviewed. The average interview length was forty-eight minutes. Four major factors were found to influence preference: the situation of care (the ways that patients understand and explain their clinical status, their treatment requirements, and the care pathway), the expectations of care (influenced by a patients desire for contact, psychological status, previous care and perceived requirements), the demands on the patient (due to each patients respective social situation and the consequences of choice) and the capacity to allocate resources to care (these include financial, infrastructural, social and healthcare resources).

Conclusion: This study has identified key factors that appear to influence patient preference for virtual consultations in orthopaedic rehabilitation. A conceptual model of these factors, derived from empirical data, has been developed highlighting how they combine and compete. A series of questions, based on these factors, have been developed to support identification of preferences in a clinical setting.

## Strengths and limitations of this study

- This is the first qualitative investigation of patient preferences for virtual consultation in a tertiary orthopaedic setting.
- Theoretical insights and explanations generated from this paper are developed from empirical data.
- Maximum variation sampling and abductive qualitative analysis reveal key factors that shape patient preferences.
- Single site qualitative study is not generalisable but mechanistic model is likely to be transportable between settings.

## Background

Videoconferencing technologies, such as Skype, Zoom, Attend Anywhere and MS Teams, have been received enthusiastically by healthcare policy makers<sup>1-3</sup> as they provide a medium to improve access to care. The technology is also viewed as a significant contributor to health and wealth<sup>4</sup> and efficiency gain strategies<sup>5</sup>. Videoconferencing technologies are being used across many fields of healthcare<sup>6</sup> and can offer advantages to patients. In January 2020, the United Kingdom recorded its first case of Novel Coronavirus (COVID-19). The outbreak of COVID-19 placed the NHS under significant strain. Social distancing measures were introduced in the United Kingdom in March 2020 and Virtual Consultations (VC) (via telephone or video call) were identified as a potential alternative to face-to-face consultations at this time<sup>7,8</sup>. Organisations were forced to rapidly implement VC as a consequence of COVID-19<sup>9</sup>.

Greenhalgh et al<sup>10</sup> conducted a multilevel mixed methods study of Skype consultations and found that they were safe, effective and convenient for patients when healthcare professionals judged them clinically appropriate. However, the authors<sup>10</sup> found that the reality of establishing VCs in outpatient services was more complex than originally anticipated. This complexity is a longstanding problem in the implementation of telemedicine and telecare systems<sup>11</sup>.

### Patient preferences and burden of treatment

A preference can be defined as an individualised 'total subjective comparative evaluation'<sup>12</sup>. Put simply, an individual weighs up the characteristics of alternatives to make a decision. Preference theory suggests that a person will prefer the outcome that yields greatest utility, and therefore that patients would prefer a VC if they believe its benefits outweigh its burdens<sup>12</sup>. To date, patient preferences for telemedicine have only been investigated at a general population level<sup>13</sup>.

VCs have been shown to change what is required of patients<sup>14 15 16</sup>. A workload for patients that exceeds their capacity has been demonstrated to be a driver of treatment burden for those with lung cancer and chronic obstructive pulmonary disease<sup>17</sup>. Treatment burden in patients with stroke has been shown to be influenced by the quality and configurations of healthcare<sup>18</sup>. What is not yet understood is how changes in the work and demands of being a patient as a result of VC influence preference for VC in a healthcare setting.

Patients' and professionals' preferences for telemedicine are not isolated from their other experiences of healthcare, or from the ways that they experience other aspects of their lives. If we are interested in the ways that patients understand and calculate the relationship between benefits and burdens, then we should also include burdens in our investigation. Shippee et al's<sup>19</sup> cumulative complexity model assumes an arithmetical relationship between delegated health system workload and individual patient capacity, and suggests that this explains healthcare utilization. However, health behaviours and service utilisation take place in a broader social context, and Burden of Treatment theory (BoT)<sup>20</sup> provides a way into this problem. BoT explains the relationship between the demands that participating in healthcare places on patients and caregivers (their workload), and the affective, cognitive, relational and material resources that they can bring to bear on this workload (their capacity).<sup>21 22</sup>

1  
2  
3 To our knowledge, no studies have yet investigated the relationship between patient preferences  
4 around telemedicine services and their experience of burden of treatment. We need to better  
5 understand this to support the development of care pathways that take into account what offers  
6 patients increased utility. This paper therefore aims to identify, characterise, and explain factors  
7 that influence patient preferences for VCs in an orthopaedic rehabilitation setting.  
8  
9

## 10 11 Methods

12 This paper is part of a larger body of work and forms phase II of the CONNECT Project. The  
13 protocol for the CONNECT Project has been published elsewhere<sup>23</sup>.  
14  
15

### 16 Setting

17  
18 The research was conducted within a single specialist orthopaedic hospital in North London, UK.  
19 All participants were recruited from the Occupational Therapy and Physiotherapy Department.  
20

### 21 Participants

22  
23 A maximum variation sample was recruited; we intended to sample our patients on a set criteria  
24 of variation (set for age and gender for patients and occupation for clinicians). This included 22  
25 patients and 22 healthcare professionals (see table 1 for the inclusion and exclusion criteria). We  
26 aimed to recruit as least 10 male and 10 female patients (10 <50 years, 10 >50 years) and 20  
27 healthcare professionals (occupational therapists and physiotherapists). Patients were selected to  
28 be interviewed to identify factors that influence patient preferences for VCs. Clinicians were  
29 selected to be interviewed to provide their perspectives on patient preference and as patient  
30 preferences are moderated by the possibilities and preferences of organisations and staff. The  
31 first two patients and healthcare professionals were used to pilot the interview schedule (See  
32 Supplementary Materials 1-2).  
33  
34  
35  
36

### 37 Recruitment

38  
39 The study was advertised using a pop-up banner in the Occupational Therapy and Physiotherapy  
40 Departments. Patients were encouraged to discuss the study with their treating healthcare  
41 professional or could approach the researcher directly via email. Healthcare professionals were  
42 sent a departmental wide email informing them of the study both from the perspective of  
43 discussing with patients as well as enrolling as a participant. Suitable and interested potential  
44 participants were provided with a participant information sheet and given at least 24 hours to  
45 discuss the study with the researcher. They were enrolled in the study upon receipt of informed  
46 written consent.  
47  
48  
49  
50  
51  
52  
53  
54  
55  
56  
57  
58  
59  
60

### Data Collection

Design of the interview schedules were formed by Burden of Treatment Theory<sup>24</sup> (see supplementary materials 1-2) and the results of Phase I of the CONNECT Project<sup>15</sup>. Interviews were conducted on site at the hospital or virtually using phone or SKYPE. Interviews were conducted by AWG and were to last around 60 minutes with the option to extend or shorten as required. All interviews were audio recorded and sent off for transcription to an external company. All transcripts were emailed or posted to participants upon receipt to give them the option to verify the data or to make any adjustments.

### Data Analysis

Interview transcripts were reviewed and uploaded into NVIVO (version 12). Data analysis followed the principles of abduction as set out by Tavory and Timmermans<sup>25</sup>. Coding was undertaken by AWG and CRM. Open coding techniques were used to identify empirical regularities (themes) in the data. Data that matched the results of the CONNECT Project Phase I were temporarily set aside; this research sought abductive 'surprises' (new themes) in additions to those gained from our previous work. Useful data to support the design of a Discrete Choice Experiment (a forthcoming paper that constitutes phase III of the CONNECT Project) were set aside. The new themes were interrogated for attributions about patient preferences and the factors that shape them. Attributions were assigned to codes within these new themes following discussion between AWG & CRM. Attributions were subsequently discussed between AWG and JJ to ensure they made sense and were accurate representations of these data. No changes were required to attributions at this stage. Inferences were made about the ways that preferences worked, the relative position and significance of the factors that shaped them, forming abductive explanation. Data matching the themes from Phase I were then incorporated once theoretical insights were formed. Finally, themes arising from the data were mapped out in a model by AWG to visualise how different factors might influence preference for virtual consultations. The theoretical model was reviewed by all authors to verify its content. A summary of these methods can be seen in Figure 1. Reporting was conducted using the Standards for Reporting Qualitative Research<sup>26</sup> (See supplementary material 3).

Figure 1 – flow diagram of methods

Table 1 – Inclusion and exclusion criteria

| Inclusion criteria                                                                                                                                                                                                                                                                                                                                                                                                                                                                                                                                                                         | Exclusion criteria                                                                                                                                                                                                                                                                                                                                                                                                                                                  |
|--------------------------------------------------------------------------------------------------------------------------------------------------------------------------------------------------------------------------------------------------------------------------------------------------------------------------------------------------------------------------------------------------------------------------------------------------------------------------------------------------------------------------------------------------------------------------------------------|---------------------------------------------------------------------------------------------------------------------------------------------------------------------------------------------------------------------------------------------------------------------------------------------------------------------------------------------------------------------------------------------------------------------------------------------------------------------|
| <ul style="list-style-type: none"> <li>• Patients, over the age of 18 years, attending the RNOH for Physiotherapy or Occupational Therapy</li> <li>• Patients who have experience of orthopaedic / musculoskeletal condition</li> <li>• Patients who are able to provide informed written consent to enter into the study</li> <li>• Patients able to understand and speak English or a language covered by the RNOH Interpreter service</li> <li>• Physiotherapists or Occupational Therapists (or assistants) who treat patients with orthopaedic / musculoskeletal disorders</li> </ul> | <ul style="list-style-type: none"> <li>• Patients without the capacity to consent</li> <li>• Patients suffering from disorders other than orthopaedic as the primary cause (eg neurological or oncology disorders)</li> <li>• Physiotherapists or Occupational Therapists who do not currently treat, or have no experience of treating patients with orthopaedic / musculoskeletal disorders</li> <li>• Patients currently or previously treated by AWG</li> </ul> |

## Patient and Public Involvement

The CONNECT Project Patient and Public Involvement steering group (PPISG) has been set up to provide guidance on the conduct of the research (details available from [www.theconnectproject.info](http://www.theconnectproject.info)). The first meeting of the PPISG was held in August 2016 prior to the submission of the research to the National Institute for Health Research in May 2017. A discussion was held about the overall research aims which supported the identification of the research questions. The PPISG has supported the design of the overall research plan and will continue to be involved during the development and refinement of each phase prior to the completion of each study protocol. The participant information and consent forms and the discussion guide for this research was reviewed by the PPISG. In addition, the PPISG will support the development of the lay summary outputs to be disseminated to patients and the public.

## Results

No changes were made to the interview schedule after the pilot interviews and these data were included in the study. Forty-four participants were interviewed in the study; 22 patients (12 female, average age 46 [range 20-78]) and 22 healthcare professionals (13 physiotherapists, 14 female). The average interview length was 48 minutes [range 28 – 81 minutes]. Two patient interviews were conducted over the phone and two over Skype. Two healthcare professional interviews were conducted over the phone. No participants returned their transcripts and therefore no amendments were made.

### Interview Data

1  
2  
3 Four themes were identified from the data: (i) the situation of care, (ii) expectations of care, (iii)  
4 demands on the patient and (iv) capacity to allocate resources to care. Results from interviews are  
5 presented by theme and evidenced in tables 2a-2d which present data from both patients and  
6 healthcare professionals.  
7

### 8 Theme 1: Situation of care

9  
10 The situation represents the ways that patients understand and explain their clinical status, their  
11 treatment requirements, and the care pathway.  
12

#### 13 (i) *Clinical status*

14  
15 Patient preferences varied based on the clinical challenges patients faced at that time and the  
16 patient's capacity to meet the demands the clinical status required. Healthcare professionals had  
17 an awareness of the volatile nature of patient's clinical status. Patients who had a long term  
18 orthopaedic condition had an awareness that their clinical status has the potential to both worsen  
19 and improve with some patients experiencing this degree of volatility. The patient's orthopaedic  
20 problem could stand alone or was in conjunction with other physical or mental health issues.  
21  
22

#### 23 (ii) *Treatment requirements*

24  
25 The requirements of treatment are dependent on the clinical status of the patient, in accordance  
26 with the normal management for that status. A spectrum of management strategies may be  
27 required, some of which traditionally require hands-on treatment and others which can be  
28 delivered without physical contact. Some clinical status' require forced restriction of activities  
29 which make physical attendance challenging, whereas other status' require physical contact.  
30  
31

#### 32 (iii) *Care pathway*

33  
34 Patient preferences are influenced by the care that is available. This includes the length of the  
35 appointment, number of appointments and regularity of these and the time of day of the  
36 appointments. Some patients who found accessing care challenging would feel less inclined to  
37 travel if the appointment was very short or at an inconvenient time of day. Others would be  
38 prepared to travel, whatever the offering. Regular repeated appointments can be burdensome for  
39 patients, particularly those with other commitments that might use up capacity. Patients with  
40 infrequent appointments appeared to favour face-to-face (F2F) appointments, although there  
41 were exceptions to this. Healthcare professionals commented on the rigidity of corporate  
42 resources, with some finding the volume of workload reduced their capacity to be flexible, for  
43 instance finding time to support patients with managing their VC.  
44  
45  
46  
47  
48  
49  
50  
51  
52  
53  
54  
55  
56  
57  
58  
59  
60



Table 2a – Theme 1: Situation of care

| Factor                 | Description                                                                                                                                        | Patients Accounts                                                                                                                                                                                                                                                                                                                                                                                                                                                                                                                                                                                                                                          | Healthcare Professionals Accounts                                                                                                                                                                                                                                                                                                                                                                                                                                                                                                                                                                                                                                                                              |
|------------------------|----------------------------------------------------------------------------------------------------------------------------------------------------|------------------------------------------------------------------------------------------------------------------------------------------------------------------------------------------------------------------------------------------------------------------------------------------------------------------------------------------------------------------------------------------------------------------------------------------------------------------------------------------------------------------------------------------------------------------------------------------------------------------------------------------------------------|----------------------------------------------------------------------------------------------------------------------------------------------------------------------------------------------------------------------------------------------------------------------------------------------------------------------------------------------------------------------------------------------------------------------------------------------------------------------------------------------------------------------------------------------------------------------------------------------------------------------------------------------------------------------------------------------------------------|
| Clinical status        | The healthcare complaint the patient experiences, its stability, reversibility and its impact on the patient in conjunction with other complaints. | <p><i>If I'm having a flare-up, sometimes I can't even leave the house. I get stuck indoors and I just wouldn't be able to do much really [P7]</i></p> <p><i>It was really annoying because it had, like, dislocated, it was dislocated loads before and after to the point that it was really affecting my life. Then I got banned from doing stairs, I couldn't go out here, I couldn't go out there, couldn't really walk anywhere [P5]</i></p>                                                                                                                                                                                                         | <p><i>You go back, and then sometimes they make an x amount of improvement, or they have a flare up and then it goes back a bit because they get really stressed out. They're back to that fearful of movement [C7]</i></p> <p><i>They're not managing those flare-ups particularly well, so they end up missing classes and things like that. It's become a bit of a spiral to have that - the physical is having a knock on the mental which is having a knock-on effect on the physical and they're just spiralling out of control [C14]</i></p>                                                                                                                                                            |
| Treatment requirements | The treatment and management of the complaint that is required. The restrictions imposed on the patient.                                           | <p><i>But after surgery, I was literally bedbound for three months, so for three months I couldn't do anything [P20]</i></p> <p><i>We're just building up my stamina I think at the moment. Not with the hands but with the shoulders. We're just starting slow, building up [P3]</i></p> <p><i>So, they've basically come up with a programme for my gym telling me how often I should do it, giving me encouragement saying you're a bit better [P6]</i></p>                                                                                                                                                                                             | <p><i>... building arm strength, stability, muscle patterning, working whole kinetic chain, core stability, lots and lots of gluteal rehab, putting a big emphasis on to their understanding of what's a good muscle ache and what they should be feeling and what's working to fatigue rather than what's working into their pain, and then understanding what's an okay pain to have, what's okay to work through, what's not okay to work through [C11]</i></p>                                                                                                                                                                                                                                             |
| Care Pathway           | The availability of healthcare to the patient                                                                                                      | <p><i>On a Skype, are you going to have a half an hour appointment? Or are you just - is it just a check up to see that you're doing the exercises correctly and they say, right, okay, fine carry on with those? Or that looks really good. So, I think it depends on the time apart, how far you are from the hospital [P2]</i></p> <p><i>So if it was once every three months, I'd definitely prefer to have - and so, maybe the later stages and everything's better, then I wouldn't mind having the Skype session, but in terms of the actual rehab and getting from surgery back to performance, I'd definitely like to see a physio. [P20]</i></p> | <p><i>...face-to-face slots for me particularly can be - would be really normal to have to wait six to eight weeks for another appointment just because of our system and the vast amount of patients that we have [C15]</i></p> <p><i>I think doing it as an adjunct where it's extra, we just don't have the capacity for a start, even if it was to [text doing], doing things like that. I think that would be difficult to fit in [C1]</i></p> <p><i>At the moment our face-to-faces are an hour. We don't know that when we do virtual it could be actually much more efficient for us. We could do a really good 30-minute telephone consultation and we can actually fit more of them in [C18]</i></p> |

## Theme 2: Expectations of care

Patients have expectations for both VC and F2F consultations. These expectations are influenced by a patient's desire for contact, psychological status, previous care and perceived requirements.

### *(i) Desire for contact*

Patients had beliefs about the effectiveness of a VCs in comparison to a F2F therapy session. They preferred F2F consultations if they believed they would have more favorable outcomes as a result. Patients also preferred F2F contact if they felt their condition was complicated and warranted a physical examination. Healthcare professionals believed that VCs were not capable of delivering the physical aspect of a session.

### *(ii) Psychological status*

Patient motivation and self-efficacy was an important consideration for both patients and healthcare professionals. Some patients felt they were less likely to complete prescribed care if they were attending virtually whereas others felt that VCs could reduce the anxieties associated with F2F interactions and travelling into the hospital. Some patients, however, found the idea of seeing themselves on a screen stressful. Healthcare professionals had an awareness of the potential limitations to offer empathy via VC to the patients who desired it.

### *(iii) Previous care*

Patients previous experience influenced their preference for VC. Patients who had built up a good rapport with their current care team felt that they want F2F to continue whereas others felt that, as they trusted their healthcare professionals, they would be willing to try a new innovation. Patients who had received sub-optimal care elsewhere felt that they would be more likely to stick to the status quo if this worked well for them. Healthcare professionals were sensitive to the varied experiences and expectation of patients.

### *(iv) Perceived requirements*

Patients who feel the need for hands on F2F care reported a preference towards F2F care. Patients who did not feel this was necessary did not feel the same way towards this. Care requirements differed based on the individual circumstances of the patient and the length of time of the appointment. Patients who travelled less frequently preferred to receive a physical examination, often as a 'checkup' to assess the physical status of the problem.

Table 2b – Theme 2: Expectations of care

| Factor                 | Description                                                                                                          | Patients Accounts                                                                                                                                                                                                                                                                                                                                                                                                                                                                                                                                                                                                                                                                                                                                                                                                                                        | Healthcare Professionals Accounts                                                                                                                                                                                                                                                                                                                                                                                                                                                                                                                                                              |
|------------------------|----------------------------------------------------------------------------------------------------------------------|----------------------------------------------------------------------------------------------------------------------------------------------------------------------------------------------------------------------------------------------------------------------------------------------------------------------------------------------------------------------------------------------------------------------------------------------------------------------------------------------------------------------------------------------------------------------------------------------------------------------------------------------------------------------------------------------------------------------------------------------------------------------------------------------------------------------------------------------------------|------------------------------------------------------------------------------------------------------------------------------------------------------------------------------------------------------------------------------------------------------------------------------------------------------------------------------------------------------------------------------------------------------------------------------------------------------------------------------------------------------------------------------------------------------------------------------------------------|
| Desire for contact     | Whether the patient / healthcare professional believes the F2F is more of a capable method of care delivery than VC. | <p><i>I'm sure I could do that at home on my own but personally I would feel comfortable knowing I've got a person actually feeling it. [P16]</i></p> <p><i>If it's something simple then, yes, that's a good idea. If it's something a bit more complicated they actually have to come and see it because it's more of a hands-on type of thing [P8]</i></p>                                                                                                                                                                                                                                                                                                                                                                                                                                                                                            | <p><i>we definitely can't do is gait re-education or gait analysis. We could probably demonstrate exercises ourselves, but actually if we're looking at a movement habit in terms of, say, how someone's shoulder moves, or you need to really see or perhaps feel what that is, I think that's obviously not able to do that [C15]</i></p> <p><i>Obviously, if it was a more physical session, if it was a practical session, that's not going to work particularly well; it's not going to work very well on Skype [C12]</i></p>                                                             |
| Psychological status   | The psychological status of the patient and the impact of this on care across different delivery formats.            | <p><i>One of the reasons why the screens would be good is I would feel less anxious to talk to someone through a screen, but I would in the same room [P9]</i></p> <p><i>You don't like the way that your life's going to look because you know you're not going to be able to achieve all the things that you want to achieve [P17]</i></p> <p><i>Over the years I have done a lot of leg and knee exercises... especially immediately after surgery... I probably should keep them going but I have to say I haven't. [PP2]</i></p> <p><i>I guess because I was in a leg brace for so long, stuff did get shouted at me and I did get called things and that, so my self-confidence isn't the best in the world [...] So to see myself in the corner of a screen doing something, it would stress me out for quite a huge amount of time. [P5]</i></p> | <p><i>It might also make them feel a bit less anxious about having to travel, having to worry if my therapist or whoever I'm coming to see makes me feel welcome or makes me feel comfortable... It might make them feel a bit more comfortable if they're in their own environment [C16]</i></p> <p><i>I think it's that how much do the patients value that just talking to someone in person, that relationship side of things and those sorts of things that maybe they might not feel so safe to do ... and also sometimes patients just want a hug [C1]</i></p>                          |
| Previous care          | Experience of previous care                                                                                          | <p><i>Yeah, I think you, for me, I feel like I've been able to build up more of a bond with them all because I've seen them in person, whereas if it had been over a screen or a phone, I don't think I would have had that [P5]</i></p> <p><i>So, I've had physio on and off for fibromyalgia and actually I've been able to connect with this much better because of the way it's delivered [P3]</i></p>                                                                                                                                                                                                                                                                                                                                                                                                                                               | <p><i>I don't think you can give a one size fits all to people. Some men particularly they just want a number, they want a number, they want sets they want reps. They just want a very clear structure and some people just you have to go that way because they react better to it. They're more likely to be more adherent to exercise if they go that way. Other people it's just a case of listening to your body, see how you feel, see what you manage. Because if you push them too far or push too little you could - you're just going to end up failing them, I think [C14]</i></p> |
| Perceived requirements | The negotiated requirements of the session                                                                           | <p><i>We tend to come down to RNOH probably once every six months now just for a check-in... so that she can then check up on those joints and make sure that I don't need to change what I'm doing or we don't need to look into it and get things investigated with orthopaedics [P17]</i></p>                                                                                                                                                                                                                                                                                                                                                                                                                                                                                                                                                         | <p><i>I think it also depends on the population. Not everyone has complex needs as well. I think if we have a routine primary knee replacement there's no reason why you can't get everything. If you have a flare referral you'd be fine to do a 30 minute, whereas if you have a revision who's had five surgeries, 30 minutes is probably not going to be enough, because there will be a lot of belief systems around that which probably need to be looked into. So, yes and no. It depends on what the patient group is [C7]</i></p>                                                     |

### Theme 3: Demands on the patient

Patients may face multiple and differing demands dependent on the choices they make regarding a VC or a F2F consultation. Demands include the care requirements, social demands and the consequences of choice.

#### *(i) Care requirements*

The care requirements are dependent on the clinical status of the patient. Patients may be required to complete complex exercise regimens or perform assessments. Some of these initiatives may benefit from optimal visualisation of movements. Some of these may require hands on facilitation. For others, manual therapy may be indicated. Preferences are likely to be mediated by what the healthcare professional believes and the consequence of choice will change the demands on patients. These changes may be burdensome depending on the patient's capacity.

#### *(ii) Social demands*

Some patients in this study reported a vast array of social demands that interfered with healthcare, such as caring for elderly relatives or young children. Often, these conflicting demands interfered with the patient's ability to attend their own appointments and rehabilitation. Patients who reported excessive social demands reported that in some circumstances VCs could be more favorable.

#### *(iii) Consequence of choice*

The use of virtual consultation equipment may require a new skill set. Patients might also need to obtain rehabilitation equipment and technology for VC. Patients who did not have the space and rehabilitation equipment available preferred to travel in for a F2F consultation. Patients that found the idea of interacting with their rehabilitation professional over a screen challenging where more likely to prefer F2F appointments whereas others did not see this as an issue. Overcoming the lack of physical contact and adapting assessments proved to be an issue for some. The lack of a suitable rehab environment was a concern to some healthcare professionals.

The demands faced by patients arose as a direct result of the situation in conjunction with the capacity to fulfil the demands. Patients who felt that VCs were less burdensome may have a preference towards VCs whereas those who find them more burdensome may have a preference towards F2F consultations.

Table 2c – Theme 3: Demands on the patient

| Factor                 | Description                                                    | Patients Accounts                                                                                                                                                                                                                                                                                                                                                                                                                                                                                                                                                                                                                                                                                                                                                                                                                                                                                                    | Healthcare Professionals Accounts                                                                                                                                                                                                                                                                                                                                                                                                                                                                                                                                                                                                                                                                                                                                                                                                                                                                  |
|------------------------|----------------------------------------------------------------|----------------------------------------------------------------------------------------------------------------------------------------------------------------------------------------------------------------------------------------------------------------------------------------------------------------------------------------------------------------------------------------------------------------------------------------------------------------------------------------------------------------------------------------------------------------------------------------------------------------------------------------------------------------------------------------------------------------------------------------------------------------------------------------------------------------------------------------------------------------------------------------------------------------------|----------------------------------------------------------------------------------------------------------------------------------------------------------------------------------------------------------------------------------------------------------------------------------------------------------------------------------------------------------------------------------------------------------------------------------------------------------------------------------------------------------------------------------------------------------------------------------------------------------------------------------------------------------------------------------------------------------------------------------------------------------------------------------------------------------------------------------------------------------------------------------------------------|
| Care requirements      | The requirements of care                                       | <p><i>It depends what you're asking them to - if it was - it depends. If it's something simple then, yes, that's a good idea. If it's something a bit more complicated they actually have to come and see it because it's more of a hands-on type of thing [P8]</i></p> <p><i>I suppose it's not so much the conversations but the physical things that you might have to do. It would be very difficult for them to work out - if you're talking physiotherapy - just how your joints were working. They couldn't really see what your back was doing or how your arm was working or whatever, and you can't - they need to feel. Physiotherapy's quite a hands on the body sort of thing [P4]</i></p> <p><i>It's ridiculous in the sense that appointments have almost become a full-time job for me. I'm really grateful, I've got a lovely team of people that know me very well and look after me [P10]</i></p> | <p><i>How many exercises can they realistically fit in their day? I'd rather they did one or two really well than five or six badly [C11]</i></p> <p><i>I guess if they've had no restrictions really at all, then to completely have those restrictions - and it can be quite debilitating because they're so used to being independent and not having to really rely on others [C4]</i></p> <p><i>we do often use our hands for some assessment in terms of feeling for muscle-activated patterns or guarding [C15]</i></p> <p><i>We do lay on our hands. It might well be around showing someone that they've become really hypersensitive. Touching them on an area of skin that is not at all uncomfortable and saying what does that feel like, does it feel like I'm poking, whatever, and then putting your hand on their back or something and then say how does that feel? [C10]</i></p> |
| Social demands         | The competing life demands that can interfere with healthcare. | <p><i>I think, because I'm not looking after my mum, my mum has gone into a care home now. At the moment I haven't a job. I'm not working. I'm at home, I'm just doing things at home. I still go to the care home and sort things out for mum and appointments and that [P2]</i></p>                                                                                                                                                                                                                                                                                                                                                                                                                                                                                                                                                                                                                                | <p><i>I think for some people things are muddling along and I probably should work on my routine, but I've got my kids, I've got my work - this takes priority and that's I think my role is trying to tease that out a bit more. So, what is your priority right now? [C12]</i></p> <p><i>Maybe this is where the overwhelmingness comes in because if you are not doing any of things you suddenly feel like you have to change your entire life to be able to manage if some of what we have said isn't said carefully [PC1]</i></p>                                                                                                                                                                                                                                                                                                                                                            |
| Consequences of choice | The impact of choice                                           | <p><i>For me, it's the equipment. I only live in a small - and it is small, isn't it - a small two-bedroom house. I would have nowhere to store the equipment... there's no option out there to rent equipment [P19]</i></p> <p><i>Some of the stuff he doesn't need to touch me for, like when he's watching me do a squat. Are my knees going the right way? Yeah. He can do that over a FaceTime. That's absolutely fine. But as you say, he needs to - if he wants to check my strength physically, then yeah, I need to be here. It only limits that [P14]</i></p>                                                                                                                                                                                                                                                                                                                                              | <p><i>You might subconsciously use that [travel time] in a beneficial way... If you are straight in on a computer screen maybe there is some prep time that is not build in to the process as easily and you have to be mindful of preparing yourself beforehand [PC1]</i></p> <p><i>If you think about the patient that is actually sent into a flare-up from the journey that they've made... [C8]</i></p> <p><i>So often if they want to try and demonstrate exercises, a common feedback is the fact that their bed's too hard or too soft and it doesn't work, and the plinths are easier to do it [C1]</i></p>                                                                                                                                                                                                                                                                               |

#### Theme 4: Capacity to allocate resources to care

*Capacity* is the patient's ability to allocate resources to care. These resources are financial, infrastructural, social and healthcare related.

(i) *Financial*

Patients found that the demands of travel to a physical appointment can be costly, particularly when this entailed long journeys by public transport. Some patients were required to take unpaid leave from employment or risk losing their job. Some patients had supportive employers or did not feel significantly impacted through the cost of attendance. Healthcare professionals were aware of these financial challenges faced by patients.

(ii) *Infrastructure*

Patients needed to have access to the hardware and software in order to use VC as a form of consultation. There was a requirement to understand how to use the technology in order to undergo a successful VC. Variations of hardware and software exist. There did not appear to be any relationship with type of hardware and software combination and preference. Some devices with larger screens were thought to be more beneficial and influence *expectations*. In addition, patients needed to have access to a suitable environment and equipment in order to undergo virtual rehabilitation.

(iii) *Social capacity*

Patients who had a support network available to them found this was a useful resource. Family members were able to assist with the logistics of travel to appointments, activities routines at home and motivation to engage with rehabilitation programmes. Healthcare professionals reported ways in which patients could enhance capacity through their social networks.

(iv) *Healthcare system*

The healthcare system can provide capacity. For example, some patients received hospital funded transport making attendance at the hospital easier. Healthcare professionals are skilled at facilitating motivation and behavior change which could improve capacity. Expectations of success may provide patients with additional motivation and self-efficacy to achieve the demands required of them.

Capacity is an important mediator of preference as it dictates whether or not a patient has the available resources to meet the demands of the situation and the expectations. Capacity is a mediator between the types of influences at work and has a direct influence on preference (See Figure 2).

The *Situation* is a factor that influences preference. Each situation is unique to the individual based on their clinical status, treatment requirements and the availability of care. The situation is influenced by the *Capacity* of the patient which in turn influences the *Demands* and the *Expectations* of patients. Whilst certain factors influence preferences for a patient in one direction, other factors may have an opposite effect.

Table 2d – Theme 4: Capacity to allocate resources to care

| Factor            | Description                                    | Patients Accounts                                                                                                                                                                                                                                                                                                                                                                                                                                                                                                                                                                                                                                                                                                                  | Healthcare Professionals Accounts                                                                                                                                                                                                                                                                                                                                                                                                                                                                                                                                                                                                                                                                             |
|-------------------|------------------------------------------------|------------------------------------------------------------------------------------------------------------------------------------------------------------------------------------------------------------------------------------------------------------------------------------------------------------------------------------------------------------------------------------------------------------------------------------------------------------------------------------------------------------------------------------------------------------------------------------------------------------------------------------------------------------------------------------------------------------------------------------|---------------------------------------------------------------------------------------------------------------------------------------------------------------------------------------------------------------------------------------------------------------------------------------------------------------------------------------------------------------------------------------------------------------------------------------------------------------------------------------------------------------------------------------------------------------------------------------------------------------------------------------------------------------------------------------------------------------|
| Financial         | The ability to free up financial resources     | <p><i>So obviously taking an afternoon off as annual leave or whatever wouldn't result in a disciplinary, but then in the long-run I have to think... [P5]</i></p> <p><i>If you're doing it once a week or something, you're spacing it out... it's travelling there. That would be - it's expensive to travel up here because it's not exactly in the closest of areas, it's in the middle of nowhere [P7]</i></p>                                                                                                                                                                                                                                                                                                                | <p><i>They might have a bit more support but again they've then got to think about to do - if they're paying for it privately there's the added cost to them [C4]</i></p> <p><i>When I think about some of these patients that come like three hours on public transport - what a waste of money that is. I think of patients that come all the way from Birmingham and Brighton. That doesn't make any sense to me, and actually at times I have said I think we should do this on the phone [C17]</i></p>                                                                                                                                                                                                   |
| Infrastructure    | Access to material and informational resources | <p><i>You could get a stand and you'd be able to see everything really. If you put it on a table, if you need to sit on a chair. You could pull it a bit away from you so they can see you. I reckon definitely it would work [P7]</i></p> <p><i>I would either Skype on my laptop or Skype on my thing, and if I could transfer to the TV, you know? I've got a smart TV, it could be done that way. Because if you've got a bigger picture you could see more, you could do more, whereas if you've got a little screen your vision is very limited to a little square [P8]</i></p>                                                                                                                                              | <p><i>If you haven't got a laptop and Skype at home, then you're probably not going to be that techy, that tech savvy, and that open to learning how to use a tablet that you've never used before or something, probably [C19]</i></p> <p><i>They would need access to the technology... do they have the internet, do they have a connection, do they have a smart device, do they have a way that they can use that and are they familiar with their platform... a prime example is SKYPE. iPhone users tend to use Facetime so do they have a SKYPE account, are they able to set it up? I think it's that accessibility, and it's have they used it before which is a big thing... [PC2]</i></p>         |
| Social capacity   | Support available through social network       | <p><i>I have a husband who does lots of stuff for me... I can't do housework because I can't lift an iron anymore [P4]</i></p> <p><i>Without that group, I think I would just be in bits right now to be honest. [P14]</i></p>                                                                                                                                                                                                                                                                                                                                                                                                                                                                                                     | <p><i>This lady, who I was talking about just before, she lived by herself and she hasn't got any carers but the family was helping [C2]</i></p> <p><i>More patients are having their family members helping them with these things at home and that visit regularly. There's no reason why that can't be - if they're turning up to help them put on TED stockings, then I'm sure they can help them turn on a tablet and watch something [C5]</i></p>                                                                                                                                                                                                                                                       |
| Healthcare system | Sources of healthcare capacity                 | <p><i>I think it's emotional support as well. I suppose in my case because I've had so many mental issues attached to my disorder, I have found support here from an orthopaedic point of view. When I had a setback and I was told there was a potential another infection in my bone I went to pieces here, and I saw [anonymised]. He was so reassuring... I know I've got security because I feel [anonymised] knows my case so well, and he knows what happened [P10]</i></p> <p><i>it's difficult for me, I can't use the underground or anything like that so I use the patient transport and they fetch me... some of those appointments have been 10 minutes or so and I have used the patient transport... [PP2]</i></p> | <p><i>But the skill then is to watch your language and rather than tell someone how easy it is, or tell someone the solution, again that's where motivational interviewing comes in. Rather than saying but you can just pace, let's work out how you can pace, say something like is there anything that you've been learning that you feel could give some boundaries there or anything you've tried? So again, you're getting the person to solve their own problems [C13]</i></p> <p><i>Sometimes the hospital transports are not quite helpful for them. They don't come on time, so they delay sometimes. She ends up missing her appointment because of a delay in the hospital transport [C2]</i></p> |

## Discussion

This paper outlines four key factors and describes mechanisms that influence patient preferences in the context of VC for orthopaedic rehabilitation. These factors have been empirically derived. These factors have been identified and characterised, and can be mapped as an explanatory model that demonstrates the interplay between factors and how they interact to influence preferences.

Figure 2: model to illustrate interactions between mechanisms that influence preference for virtual consultations

### (a) The relationship between *Situation of care* and *Expectations of care*

The situation informs the patient's expectations of care. If the situation demands F2F (or VC) the patient will be required to decide whether F2F (or VC) would be the most suitable alternative based on the care they expect to receive. These expectations influences the situation of care for the patient.

### (b) The relationship between *Situation of care* and *Demands of care*

The situation requires the patient to perform specific tasks to engage in their care. These demands will fluctuate as the clinical status and the treatment requirements fluctuate. The availability of the care pathway may remain fixed or fluid dependent on the specific situation. Resources available through capacity will dictate the demands of the situation. Competing demands on the patient may reduce available capacity to complete the demands of care dictated by the situation. The demands on the patient, and their interaction with the patient's capacity in turn influences the situation.

### (c) The relationship between *Situation of care* and *Capacity to allocate resources to care*

Patient capacity influences patient expectations indirectly via the demands and expectations of care. In addition; the capacity of the patient to engage with care itself can influence the situation as resources may be allocated to the patient by the healthcare provider depending on a need's basis, for example, whether a patient qualifies for hospital funded transport. The capacity of the patient to engage with care is therefore directly dependent on the situation.

### (d) The consequences of *Preference*

The preferred choice between a F2F and a VC has consequences. The consequences of choice directly impact on the demands of the patient and their expectations of care. Changes in expectations and demand in turn influence the patient's capacity and the situation.

### (e) The formation of *Preference*

The formation of preference, within this study, is the resulting process of complex factors interacting with one another. The establishment of the situation and capacity dictate the expectations and demands of care. Preferences are established following a total (considering the options available) subjective comparative (these options are compared based on the patient's experience) evaluation (the option with the most utility is selected).



1  
2  
3 A total subjective comparative evaluation is a cognitively demanding task<sup>12</sup>. We have found, from  
4 this research that multiple factors are at play that combine and compete. To ask sensitising  
5 questions in relation to these factors may facilitate the cognitively demanding task of preference  
6 formation. These results can therefore be applied to clinical care in the form of sensitising  
7 questions for clinicians to ask patients to support formation of preferences for or against F2F (or  
8 VC). These questions have been developed from the results of this study are demonstrated in  
9 table 3 and are suitably generic; they can be applied across all areas of healthcare as they are not  
10 limited to orthopaedic rehabilitation. Illustrations with sensitising questions (Supplementary  
11 Material 4 = Situation of care, Supplementary Material 5 = Expectations of care, Supplementary  
12 Material 6 = Capacity to allocate resources to care, Supplementary Material 7 = demands of care)  
13 are presented within the supplementary materials.  
14  
15  
16  
17  
18  
19  
20  
21  
22  
23  
24  
25  
26  
27  
28  
29  
30  
31  
32  
33  
34  
35  
36  
37  
38  
39  
40  
41  
42  
43  
44  
45  
46  
47  
48  
49  
50  
51  
52  
53  
54  
55  
56  
57  
58  
59  
60

Table 3: Practical questions to support formation of preference

| Theme                | Factor                 | Description                                                                                                                                        | Practical questions to support identification of preference for patients                                                                                                                                                                                      | Practical questions for clinicians to ask patients to support identification of preference                                                                                                                                                               |
|----------------------|------------------------|----------------------------------------------------------------------------------------------------------------------------------------------------|---------------------------------------------------------------------------------------------------------------------------------------------------------------------------------------------------------------------------------------------------------------|----------------------------------------------------------------------------------------------------------------------------------------------------------------------------------------------------------------------------------------------------------|
| Situation of care    | Clinical status        | The healthcare complaint the patient experiences, its stability, reversibility and its impact on the patient in conjunction with other complaints. | <ul style="list-style-type: none"> <li>Does my problem require me to be seen in person?</li> <li>Would having a virtual appointment make things easier for me?</li> </ul>                                                                                     | <ul style="list-style-type: none"> <li>Does your problem require you to be seen in person?</li> <li>Would having a virtual appointment make things easier for you?</li> <li></li> </ul>                                                                  |
|                      | Treatment requirements | The treatment and management of the complaint that is required. The restrictions imposed on the patient.                                           | <ul style="list-style-type: none"> <li>Can the treatment I need be delivered virtually?</li> </ul>                                                                                                                                                            | <ul style="list-style-type: none"> <li>Do you think the treatment you need can be delivered virtually?</li> </ul>                                                                                                                                        |
|                      | Care Pathway           | The availability of healthcare to the patient                                                                                                      | <ul style="list-style-type: none"> <li>What do I need from my clinician to support me with a Face-to-face or or a virtual appointment?</li> </ul>                                                                                                             | <ul style="list-style-type: none"> <li>What can I do to support you with a Face-to-face or or a virtual appointment?</li> </ul>                                                                                                                          |
| Expectations of care | Desire for contact     | Whether the patient / healthcare professional believes the F2F is more of a capable method of care delivery than VC.                               | <ul style="list-style-type: none"> <li>Do I think my issue can be best managed by a face-to-face or a virtual appointment?</li> <li>Does my healthcare professional think my issue can be best managed by a face-to-face or a virtual appointment?</li> </ul> | <ul style="list-style-type: none"> <li>Do you think your issue could be best managed by a face-to-face or a virtual appointment?</li> <li>Do you believe I think your issue could be best managed by a face-to-face or a virtual appointment?</li> </ul> |
|                      | Psychological status   | The psychological status of the patient and the impact of this on care across different delivery formats.                                          | <ul style="list-style-type: none"> <li>How would a virtual appointment affect me?</li> <li>Am I comfortable seeing myself on a screen?</li> </ul>                                                                                                             | <ul style="list-style-type: none"> <li>How would a virtual appointment affect you?</li> <li>Would you be comfortable seeing yourself on a screen?</li> </ul>                                                                                             |
|                      | Previous care          | Experience of previous care                                                                                                                        | <ul style="list-style-type: none"> <li>Could my previous treatment have been managed successfully virtually?</li> </ul>                                                                                                                                       | <ul style="list-style-type: none"> <li>Do you think your previous treatment could be managed successfully virtually?</li> </ul>                                                                                                                          |
|                      | Perceived requirements | The negotiated requirements of the session                                                                                                         | <ul style="list-style-type: none"> <li>How can my problem be managed best?</li> <li>Can my problem be managed by a face-to-face or virtual appointment?</li> </ul>                                                                                            | <ul style="list-style-type: none"> <li>How can your problem be managed best?</li> <li>Can your problem be managed by a face-to-face or virtual appointment?</li> </ul>                                                                                   |

|                                        |                        |                                                                |                                                                                                                                                                                                                   |                                                                                                                                                                                                                             |
|----------------------------------------|------------------------|----------------------------------------------------------------|-------------------------------------------------------------------------------------------------------------------------------------------------------------------------------------------------------------------|-----------------------------------------------------------------------------------------------------------------------------------------------------------------------------------------------------------------------------|
| Demands of care                        | Care requirements      | The requirements of care                                       | <ul style="list-style-type: none"> <li>• What do I need to during my rehab?</li> <li>• Can I achieve this?</li> </ul>                                                                                             | <ul style="list-style-type: none"> <li>• What does your care require of you?</li> <li>• Can you achieve this?</li> </ul>                                                                                                    |
|                                        | Social demands         | The competing life demands that can interfere with healthcare. | <ul style="list-style-type: none"> <li>• What other things do I need to do that might get in the way of a F2F or VC?</li> </ul>                                                                                   | <ul style="list-style-type: none"> <li>• What other things do I need to do that might get in the way of a F2F / VC?</li> </ul>                                                                                              |
|                                        | Consequences of choice | The impact of choice                                           | <ul style="list-style-type: none"> <li>• What do I need to do if I choose a v?</li> </ul>                                                                                                                         | <ul style="list-style-type: none"> <li>• What do you need to do if you choose a face-to-face or a virtual appointment?</li> </ul>                                                                                           |
| Capacity to allocate resources to care | Financial              | The ability to free up financial resources                     | <ul style="list-style-type: none"> <li>• What would the financial impact be for me if I choose a face-to-face or a virtual appointment?</li> </ul>                                                                | <ul style="list-style-type: none"> <li>• What would the financial impact be for you if you choose a face-to-face or a virtual appointment??</li> <li>•</li> </ul>                                                           |
|                                        | Infrastructure         | Access to material and informational resources                 | <ul style="list-style-type: none"> <li>• Do I have access to what I need to have a face-to-face or a virtual appointment?</li> <li>• Do I understand how use what is needed for a virtual appointment?</li> </ul> | <ul style="list-style-type: none"> <li>• Do you have access to what you need to have a face-to-face or a virtual appointment??</li> <li>• Do you understand how to use what is needed for a virtual appointment?</li> </ul> |
|                                        | Social capacity        | Support available through social network                       | <ul style="list-style-type: none"> <li>• Do I have anyone who could support me with a face-to-face or a virtual appointment?</li> </ul>                                                                           | <ul style="list-style-type: none"> <li>• Do you have anyone who could support you with a face-to-face or a virtual appointment?</li> </ul>                                                                                  |
|                                        | Healthcare system      | Sources of healthcare capacity                                 | <ul style="list-style-type: none"> <li>• How can my healthcare professionals support me to access my care with either a face-to-face or a virtual appointment?</li> </ul>                                         | <ul style="list-style-type: none"> <li>• How can we support you to access your care with either a face-to-face or a virtual appointment?</li> </ul>                                                                         |

F2F – face to face consultation; VC – virtual consultation

## Results in context

Burden of treatment theory<sup>24</sup> and the cumulative complexity model<sup>19</sup> both focus on the relationship between the workload demands on the patient with the patients capacity to do the work. Our previous research<sup>15</sup> hypothesised that the work of being a patient influences preference; patients may prefer the least burdensome option when giving the choice between a F2F and VC.

This current paper extends our previous model of patient preferences adding in: the situation of care, patient's expectations of care and patients ability to allocate resources to care (see Figure 2). Some patients find the process of F2F attendance burdensome. Despite this, some of these patients preferred to receive hands on manipulation. Some patients were prepared to tolerate burden as part of a process that offered them F2F care they believed was superior to a VC. In addition, some patients perceived the consequences of choosing a F2F (or VC) would significantly impact on their overall experience of care, both positive or negative. Additionally, factors such as confidentiality in VC and trustworthiness<sup>27</sup> may influence expectations of care. The model within this paper clearly demonstrates additional factors relating to BoT are likely to influence their preference. The option that best meets patients' expectations of care influences preferences.

Some patients discussed the situational nature of their problem and how their preferences may have been different under different circumstances. This is in accord with our qualitative study of acceptability for rehabilitation consultations<sup>14</sup>. Greenhalgh et al<sup>10</sup> found that videoconferencing using SKYPE was useful to access hard to reach patients and that avoiding long journeys to access care was beneficial. Not travelling can reduce healthcare costs<sup>28</sup> and the need for family to accompany patients on their journey<sup>14</sup>. Patients without the support of their families in our study found this to be beneficial. Kaambwa et al<sup>13</sup> found that patients had strong preferences for VCs when their clinic was between 15-100km away and when their use reduced costs. The dynamics between the situation and the patient's capacity for care create a unique state of affairs for each patient at the time of being offered the choice between consultations. These factors directly influence the patients burden and expectations of care. Consideration of these factors, and identification of the option with the most utility to the patient, will influence preferences.

This study is separated from many others (e.g. in primary care<sup>29</sup> and psychiatry<sup>30</sup> studies) because orthopaedic rehabilitation often requires 'hands on' care which is not possible virtually. The lack of touch over VC can inhibit patients experience of receiving care, particularly when they desire it<sup>31</sup>. Patients in the PhysioDirect study of telephone consultations still wanted to have 'proper' F2F physio<sup>32</sup>. VC has been seen as 'impersonal'<sup>33</sup> and can reduce emotional bonding between the patient and healthcare professional<sup>31</sup>.

A common theme in our data was the negative psychological impact some patients felt seeing themselves through a screen. This was in accord with a patient in the Jansen-Kasterink study<sup>33</sup> who reported: *'I cannot imagine seeing myself on video, I already have trouble seeing myself in a picture'*. Some patients for whom this was not a problem, however, found that being in their own environment and avoiding travel made them feel more relaxed<sup>10</sup> which could in itself improve patient-healthcare professional relationships. If offered the choice of a F2F or VC, patients need to give consideration to the alternatives; the actions, the state of affairs and the consequences of

1  
2  
3 choosing each alternative. The present research does not suggest how *much* the highlighted  
4 factors influences preferences or compete and compete with each other. This study will inform  
5 the design of a Discrete Choice Experiment, a deductive investigation to quantitatively measure  
6 how each factor influences preferences for patients in a pragmatic real-world scenario. A  
7 thorough understanding of the effect and influence of preferences will enable patient-centered  
8 service design.  
9  
10

11  
12  
13 However, the results of this study should be interpreted in light of their limitations. It was  
14 conducted at a single center and may not translate to other clinical areas. To overcome this,  
15 variation across participants was sought and attention focused towards more general factors to  
16 allow for transportability to other clinical settings. . The lead researcher (AG) is a healthcare  
17 professional within the centre which could have led to bias results through local familiarity. To  
18 limit this, patients who had a previous existing relationship with AWG were excluded from the  
19 study as per the exclusion criteria. It was not possible, however, to exclude clinical staff, most of  
20 whom were known to AG. This was taken into account in the data analysis through a process of  
21 defamiliarisation; attributions for each data point were orientated into a taxonomy to facilitate  
22 model development. Raw interview data was used to illustrate the model.  
23  
24  
25

### 26 27 Potential impact of Covid-19 pandemic on the future of virtual consultations

28  
29 The empirical data collection for this research was conducted prior to the COVID-19 pandemic.  
30 The COVID-19 pandemic has accelerated the introduction of VC across healthcare. The rapid  
31 implementation of VC<sup>9</sup> may shape the future of this work in a way that was not previously  
32 anticipated. The COVID-19 'situation' has influenced an increased uptake of VC in practice. Whilst  
33 this research did not formally collect data regarding previous experience of VC (even in a different  
34 setting), future research should explore patient and clinician experience of using VC for healthcare  
35 consultations. Further research evaluating the use of VC during the COVID-19 pandemic will  
36 support future service redesign.  
37  
38  
39  
40

## 41 **Conclusions**

42  
43 We conducted 44 qualitative interviews to gain a thorough understanding of the mechanisms that  
44 influence patient preference. Multiple factors were identified: the situation of care (the ways that  
45 patients understand and explain their clinical status, their treatment requirements, and the care  
46 pathway), the expectations of care (influenced by a patients desire for contact, psychological  
47 status, previous care and perceived requirements), the demands of care (of each patients  
48 respective social situation and the consequences of choice) and the capacity to allocate resources  
49 to care (the patient's ability to allocate resources to care; these include financial, infrastructural,  
50 social and healthcare resources). Factors may combine or compete with each other to influence  
51 preference. The patient's situation is dynamic and therefore preferences must also be dynamic.  
52 The formation of preference is cognitively demanding and sensitising questions may support  
53 patients to identify their preferred consultation format. This research illuminates the factors that  
54 appear to influence preference for patients. This is important for healthcare professionals; an  
55 understanding of preferences is essential to support the design of patient care pathways  
56 incorporating virtual consultations. The dynamic model presented here can be used to inform  
57  
58  
59  
60

1  
2  
3 quantitative studies such as discrete choice experiments, and could act as a programme theory to  
4 inform future trials.  
5  
6  
7  
8  
9

10 **4696 excl tables**  
11  
12  
13  
14  
15  
16  
17  
18  
19  
20  
21  
22  
23  
24  
25  
26  
27  
28  
29  
30  
31  
32  
33  
34  
35  
36  
37  
38  
39  
40  
41  
42  
43  
44  
45  
46  
47  
48  
49  
50  
51  
52  
53  
54  
55  
56  
57  
58  
59  
60

For peer review only

## Abbreviations

BoT – Burden of Treatment Theory

CONNECT (Project) – Care in Orthopaedics, burdeN of treatmeNt and the Effect of Communication Technology

F2F – face-to-face care

VC – virtual consultation

## Declarations

### Ethics approval and consent to participate

Ethical approval was received for this study (Approval received 4<sup>th</sup> December 2018 from the South Central-Oxford C Research Ethics Committee [IRAS ID: 255172, REC Reference 18/SC/0663]). All participants were provided with a participant information sheet and given at least 24 hours to consider the information and ask questions before being recruited into the study. All participants provided informed, written consent prior to enrolment.

### Availability of data and materials

Data are available upon reasonable request from the corresponding author.

### Competing interests

None to declare

### Funding

Anthony Gilbert is funded by a National Institute for Health Research (NIHR), Clinical Doctoral Research Fellowship for this research project (ICA-CDRF-2017-03-025). Anthony Gilbert and Carl May are supported by the National Institute for Health Research ARC North Thames. The views expressed in this publication are those of the author(s) and not necessarily those of the National Institute for Health Research or the Department of Health and Social Care.

### Authors' contributions

AWG wrote the paper and conceived the project with CRM, JJ and MS. CRM guided qualitative data collection. AWG conducted all the interviews. CRM assisted with data analysis, and with AWG developed the model. CRM, JJ and MS edited and critically revised the paper. All authors have read and approved the manuscript. AWG is the guarantor of the manuscript.

### Acknowledgements

The authors thank members of the CONNECT Project Patient and Public Involvement steering group for their invaluable contributions to the overall study design of the CONNECT Project and obtaining funding for the PhD Fellowship. The authors thank Kate Forrester and Geoff Buckley for their assistance with the development of the patient facing materials. The authors also thank John

1  
2  
3 Doyle, Anju Jaggi, Iva Hauptmannova and colleagues within the Therapies Directorate and  
4 Research and Innovation Centre at the Royal National Orthopaedic Hospital for their ongoing  
5 support. The authors are grateful to the 22 patients and 22 members of staff who participated in  
6 this study.  
7  
8  
9  
10  
11  
12  
13  
14  
15  
16  
17  
18  
19  
20  
21  
22  
23  
24  
25  
26  
27  
28  
29  
30  
31  
32  
33  
34  
35  
36  
37  
38  
39  
40  
41  
42  
43  
44  
45  
46  
47  
48  
49  
50  
51  
52  
53  
54  
55  
56  
57  
58  
59  
60

For peer review only



## References

1. Health BCMo. Primary and Community Care in BC: A Strategic Policy Framework 2015 [Available from: <https://www.health.gov.bc.ca/library/publications/year/2015/primary-and-community-care-policy-paper.pdf> accessed 28th February 2020 2020.
2. Australia GUT. Financial Incentives for Telehealth Canberra, AU2012 [Available from: [https://gp2u.com.au/static/documents/Telehealth\\_Program\\_Guidelines\\_effective\\_1\\_July\\_2012.pdf](https://gp2u.com.au/static/documents/Telehealth_Program_Guidelines_effective_1_July_2012.pdf) accessed 28th February 2020.
3. NHS. The NHS Long Term Plan. In: Health Do, ed. Online, 2019.
4. Garber S, Gates SM, Keeler EB, et al. Redirecting Innovation in U.S. Health Care: Options to Decrease Spending and Increase Value. *Rand Health Quarterly* 2014;4(1):3-3.
5. Mahendradhata Y, Trisnantoro L, Listyadewi S, et al. The Republic of Indonesia health system review: Health Systems in Transition; 2017  
[<https://apps.who.int/iris/bitstream/handle/10665/254716/9789290225164-eng.pdf;sequence=1>]. Available from: <https://apps.who.int/iris/bitstream/handle/10665/254716/9789290225164-eng.pdf> accessed 16th December 2019.
6. Armfield NR, Bradford M, Bradford NK. The clinical use of Skype—For which patients, with which problems and in which settings? A snapshot review of the literature. *International Journal of Medical Informatics* 2015;84(10):737-42. doi: 10.1016/j.ijmedinf.2015.06.006
7. Greenhalgh T, Koh GCH, Car J. Covid-19: a remote assessment in primary care. *BMJ (Clinical research ed)* 2020;368:m1182. doi: 10.1136/bmj.m1182
8. Greenhalgh T, Wherton J, Shaw S, et al. Video consultations for covid-19. *BMJ (Clinical research ed)* 2020;368:m998. doi: 10.1136/bmj.m998
9. Gilbert A, Billany J, Adam R, et al. Rapid implementation of virtual clinics due to COVID-19: Report and early evaluation of a Quality Improvement initiative. *BMJ Open Quality* 2020;[Accepted ahead of print]
10. Greenhalgh T, Shaw S, Vijayaraghavan S, et al. Real-world implementation of video outpatient consultations at macro, meso, and micro levels: Mixed-method study. *Journal of Medical Internet Research* 2018;20(4) doi: 10.2196/jmir.9897
11. Mair F, May C, O'Donnell C, et al. Factors that promote or inhibit the implementation of e-health systems: an explanatory systematic review. *Bulletin of the World Health Organization* 2012;90:357-64. doi: doi: 10.2471/BLT.11.099424
12. Hausman DM. Preference, Value, Choice, and Welfare: Cambridge University Press 2012.
13. Kaambwa B, Ratcliffe J, Shulver W, et al. Investigating the preferences of older people for telehealth as a new model of health care service delivery: A discrete choice experiment. *Journal of Telemedicine and Telecare* 2016;23(2):301-13. doi: 10.1177/1357633X16637725
14. Gilbert AW, Jaggi A, May CR. What is the acceptability of real time 1:1 videoconferencing between clinicians and patients for a follow-up consultation for multi-directional shoulder instability? *Shoulder & Elbow* 2019;11(1):53-59. doi: 10.1177/1758573218796815
15. Gilbert A, Jones J, Jaggi A, et al. Use of virtual consultations in an orthopaedic rehabilitation setting: how do changes in the work of being a patient influence patient preferences? A systematic review and qualitative synthesis. *BMJ Open* 2020;10:e036197. doi: 10.1136/bmjopen-2019-036197
16. Gilbert AW, Jaggi A, May CR. What is the patient acceptability of real time 1:1 videoconferencing in an orthopaedics setting? A systematic review. *Physiotherapy (United Kingdom)* 2018;104(2):178-86. doi: 10.1016/j.physio.2017.11.217
17. Lippiett KA, Richardson A, Myall M, et al. Patients and informal caregivers' experiences of burden of treatment in lung cancer and chronic obstructive pulmonary disease (COPD): a systematic review and synthesis of qualitative research. *BMJ Open* 2019;9(2):e020515-e15. doi: 10.1136/bmjopen-2017-020515
18. Gallacher K, I., May C, R., Langhorne P, et al. A conceptual model of treatment burden and patient capacity in stroke. *BMC Family Practice* 2018(19):9. doi: 10.1186/s12875-017-0691-4

19. Shippee ND, Allen SV, Leppin AL, et al. Attaining minimally disruptive medicine: Context, challenges and a roadmap for implementation. *Journal of the Royal College of Physicians of Edinburgh* 2015;45(2):118-22. doi: 10.4997/JRCPE.2015.206
20. Wall PDH, Sprowson AP, Parsons N, et al. Protocol for a single-centre randomised controlled trial of multimodal periarticular anaesthetic infiltration versus single-agent femoral nerve blockade as analgesia for total knee arthroplasty: Perioperative Analgesia for Knee Arthroplasty (PAKA). *BMJ Open* 2015;5(12):e009898-e98. doi: 10.1136/bmjopen-2015-009898
21. May C. Towards a general theory of implementation. *Implementation Science* 2013;8(1) doi: 10.1186/1748-5908-8-18
22. May C, Montori VM, Mair FS. We need minimally disruptive medicine. *BMJ: British Medical Journal* 2009;339(7719):485.
23. Gilbert A, Jones J, Stokes M, et al. Protocol for the CONNECT Project: a mixed methods study investigating patient preferences for communication technology use in orthopaedic rehabilitation consultations. *BMJ Open* 2019;9(12):e035210. doi: 10.1136/bmjopen-2019-035210
24. May CR, Hunt K, May CM, et al. Rethinking the patient: Using Burden of Treatment Theory to understand the changing dynamics of illness. *BMC Health Services Research* 2014;14(1) doi: 10.1186/1472-6963-14-281
25. Tavory I, Timmermans S. *Abductive Analysis: Theorizing Qualitative Research*. Chicago and London: University of Chicago Press 2014.
26. O'Brien BC, Harris IB, Beckman TJ, et al. Standards for reporting qualitative research: A synthesis of recommendations. *Academic Medicine* 2014;89(9):1245-51. doi: 10.1097/ACM.0000000000000388
27. Mark AH, Elizabeth D, Beiyao Z, et al. Trust in Physicians and Medical Institutions: What Is It, Can It Be Measured, and Does It Matter? *The Milbank Quarterly* 2001;79(4):613.
28. Powell RE, Henstenburg JM, Cooper G, et al. Patient perceptions of telehealth primary care video visits. *Annals of Family Medicine* 2017;15(3):225-29. doi: 10.1370/afm.2095
29. Donaghy E, Hammersley V, Bikker A, et al. Acceptability, benefits, and challenges of video consulting: A qualitative study in primary care. *British Journal of General Practice* 2019;69(686):E586-E94. doi: 10.3399/bjgp19X704141
30. Wynn R, Bergvik S, Pettersen G, et al. Clinicians' experiences with videoconferencing in psychiatry. *Studies in health technology and informatics* 2012;180:1218-20.
31. Cranen K, Drossaert CHC, Brinkman ES, et al. An exploration of chronic pain patients' perceptions of home telerehabilitation services. *Health Expectations* 2012;15(4):339-50. doi: 10.1111/j.1369-7625.2011.00668.x
32. Pearson J, Richardson J, Calnan M, et al. The acceptability to patients of PhysioDirect telephone assessment and advice services; a qualitative interview study, 2016.
33. Jansen-Kosterink S, In 't Veld RH, Hermens H, et al. A Telemedicine Service as Partial Replacement of Face-to-Face Physical Rehabilitation: The Relevance of Use. *Telemedicine Journal And E-Health: The Official Journal Of The American Telemedicine Association* 2015;21(10):808-13. doi: 10.1089/tmj.2014.0173

1  
2  
3  
4  
5  
6  
7  
8  
9  
10  
11  
12  
13  
14  
15  
16  
17  
18  
19  
20  
21  
22  
23  
24  
25  
26  
27  
28  
29  
30  
31  
32  
33  
34  
35  
36  
37  
38  
39  
40  
41  
42  
43  
44  
45  
46  
47  
48  
49  
50  
51  
52  
53  
54  
55  
56  
57  
58  
59  
60

Figure 1: flow diagram of methods

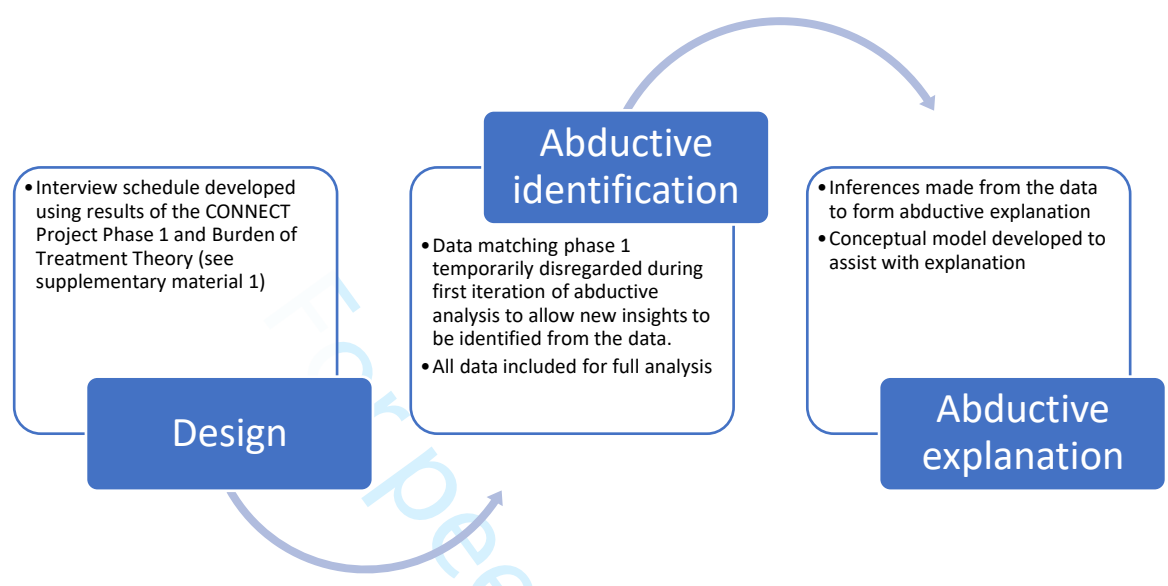

Figure 2: model to illustrate interactions between mechanisms that influence preference for virtual consultations

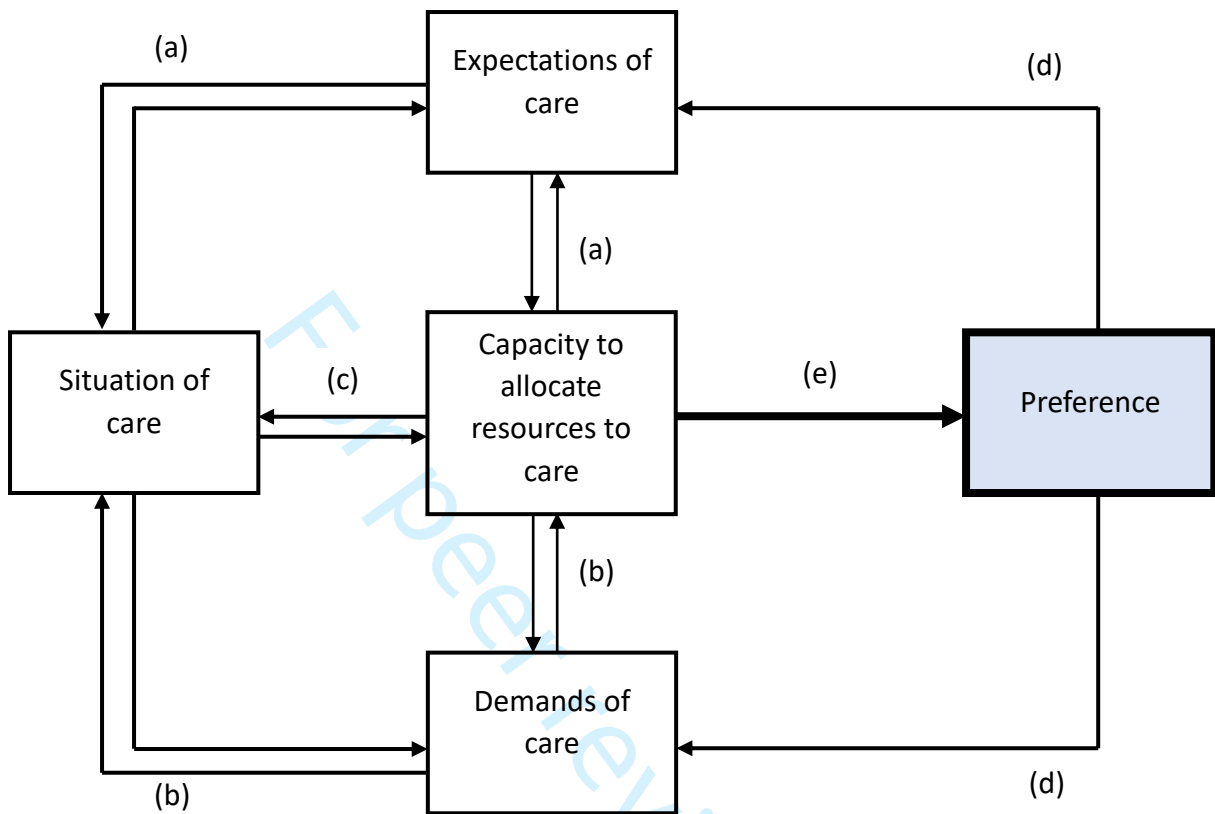



## CONNECT Project Patient Interview Schedule

### Part 1 – Burden of Treatment

- **Impact on Patient:** how technology consultations influence the experience of living with illness and engagement with clinical care

What was life like before you got your condition?

How does your condition affect you with daily life?

- Family
- Friends
- Work
- Hobbies
- Day to day activities and routine

Does anyone support you to manage your condition?

How do you manage your condition?

- Routine stuff
- Managing exacerbations

What medical services do you interact with, what for?

- Regularity?

How would using communication technology impact on how you manage your condition?



## Part 2 – Results of Phase 1

- **Skills:** what were needed, how were they gained, how were they enacted in practice.

*What skills do you think you would need in order to use Communication technology for your [physio / OT]? (Is there any difference between the two?)*

*Do you have the skills now? How would you get them? How could the RNOH support you to get them?*

*Describe how you think communication technology use would look in reality*

- **Clinical Interactions:** impact of technology consultations on clinical interactions

*What is the relationship like with you and your clinician now? Would it be different using communication technology? What could you still do? What couldn't you do? How would this make you feel?*

*How would it be with someone different? What would be 'a good person'. What would be a 'bad person'.*

- **Environment:** the location and resources required to engage with clinical rehabilitation

*What would you physically need to use communication technology? Where would you get it from? Where would you like to get it from (ie self-sourced or hospital sourced)*

*Where would you use it from? What space would you need to achieve the objectives of the consultation?*

- **Processes:** how technology consultations affect routine clinical practice

*What has your journey been as an RNOH patient (previous care, how they got referred, waiting time, experience of being a patient, dealing with other services?)*

*How would this change with using communication technology? Wat would be better? What would be worse?*

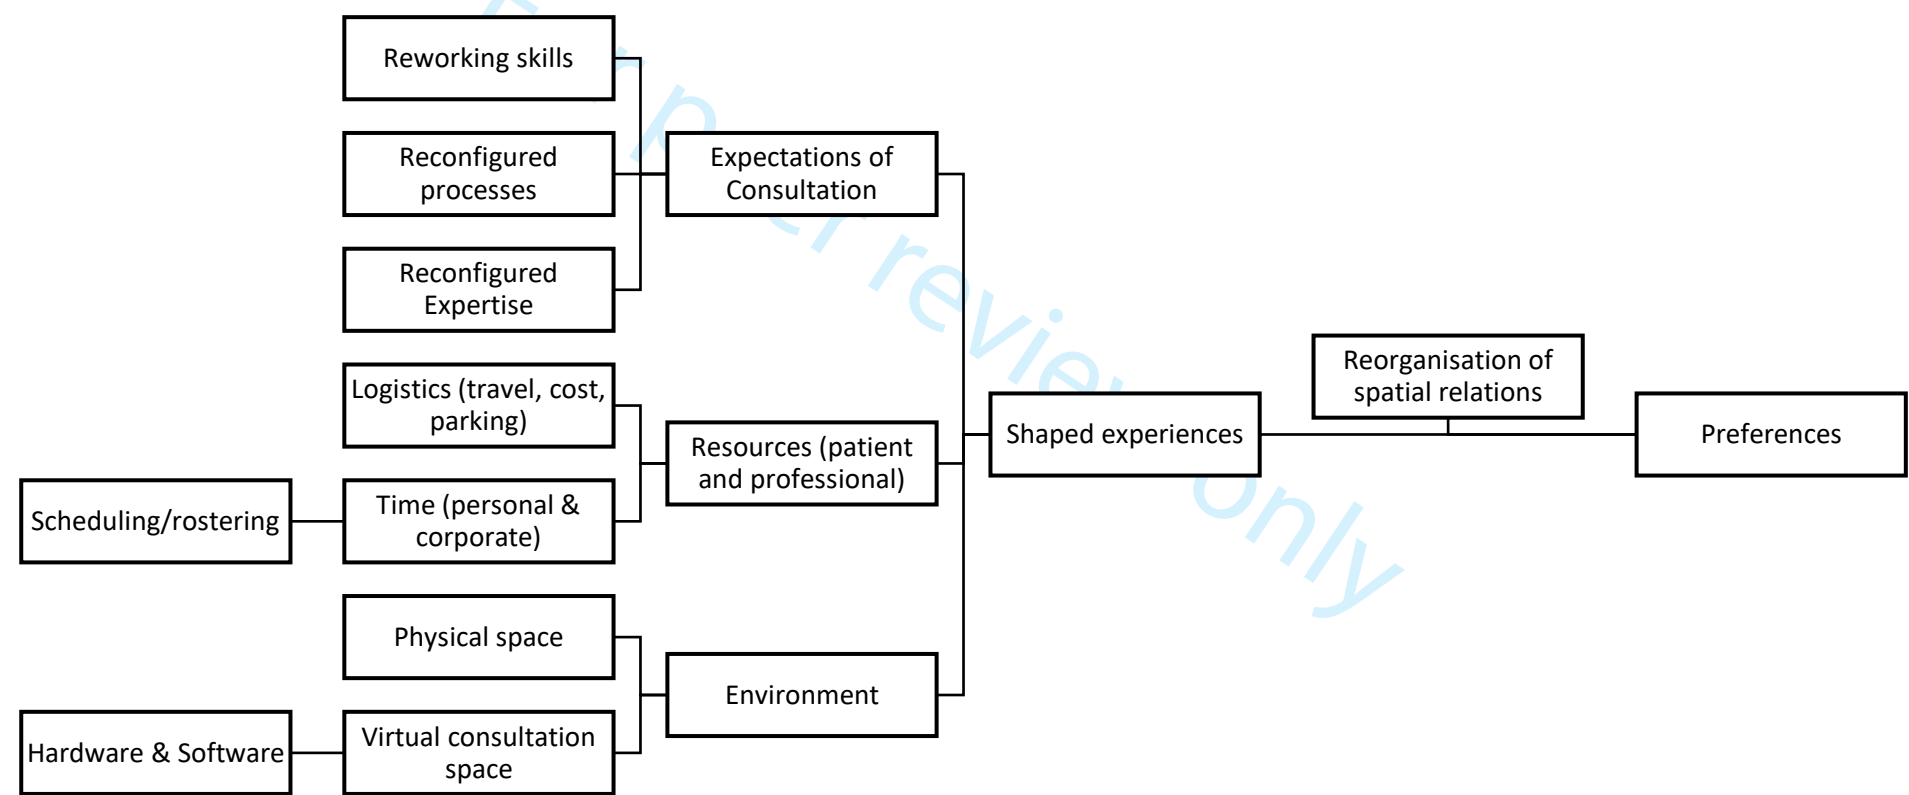

1  
2  
3  
4  
5  
6  
7  
8  
9  
10  
11  
12  
13  
14  
15  
16  
17  
18  
19  
20  
21  
22  
23  
24  
25  
26  
27  
28  
29  
30  
31  
32  
33  
34  
35  
36  
37  
38  
39  
40  
41  
42  
43  
44  
45  
46

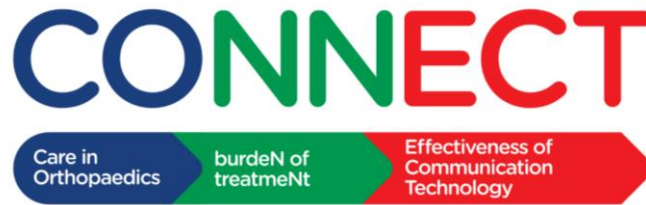

## Part 3 – DCE Design

- **Preferences:** the potential patients see for technology as an alternative to routine face to face care

In what situations would you be happy to use technology?

In what situations would you not be happy to use?

What would use look like for you at the RNOH?

What would we need to consider? From a personal perspective? From others' perspective?

Anything you would like to add that might help the research?





## CONNECT Project Clinician Interview Schedule

### Part 1 – Burden of Treatment

- **Impact on Patient:** how technology consultations influence the experience of living with illness and engagement with clinical care

Can you give me examples of how patients' conditions affect their life? eg

- Family
- Friends
- Work
- Hobbies
- Day to day activities and routine

Do your patients need support to manage their condition?

How do patients manage their condition?

- Routine stuff
- Managing exacerbations

What medical services do your patients interact with, what for?

- Regularity?

How would using communication technology impact on how patients manage their conditions?



## Part 2 – Results of Phase 1

- **Skills:** what were needed, how were they gained, how were they enacted in practice.

*What skills do you think patients would need in order to use Communication technology for your [physio / OT]? (Is there any difference between the two?)*

*Do your patients have the skills now? How would they get them? How could the RNOH support them to get them?*

*Describe how you think communication technology use would look in reality*

- **Clinical Interactions:** impact of technology consultations on clinical interactions

*Would it be different using communication technology? What could you still do? What couldn't you do? How would this make your patients feel?*

*How would it be with someone different? What would be 'a good person'. What would be a 'bad person'.*

- **Environment:** the location and resources required to engage with clinical rehabilitation

*What would you physically need to use communication technology? Where would patients get it from? Where would they like to get it from (ie self-sourced or hospital sourced)*

*Where would they use it from? What space would they need to achieve the objectives of the consultation?*

- **Processes:** how technology consultations affect routine clinical practice

*Think of your patients pathway....  
(previous care, how they got referred, waiting time, experience of being a patient, dealing with other services?)*

*How would this change with using communication technology? What would be better? What would be worse?*



1  
2  
3  
4  
5  
6  
7  
8  
9  
10  
11  
12  
13  
14  
15  
16  
17  
18  
19  
20  
21  
22  
23  
24  
25  
26  
27  
28  
29  
30  
31  
32  
33  
34  
35  
36  
37  
38  
39  
40  
41  
42  
43  
44  
45  
46



## Part 3 – DCE Design

- **Preferences:** the potential patients see for technology as an alternative to routine face to face care

In what situations would patients be happy to use technology?

In what situations would patients not be happy to use?

What would use look like for you at the RNOH?

What would we need to consider? From a personal perspective? From others' perspective?

Anything you would like to add that might help the research?

## ID bmjopen-2020-041038 SRQR Checklist

|                                                    | <b>Item</b>                                                                                                                                                                                                                                                                                                                                                                                          | <b>Page</b> |
|----------------------------------------------------|------------------------------------------------------------------------------------------------------------------------------------------------------------------------------------------------------------------------------------------------------------------------------------------------------------------------------------------------------------------------------------------------------|-------------|
| <b>Title</b>                                       | Item 1. Title: Concise description of the nature and topic of the study. Identifying the study as qualitative or indicating the approach (e.g., ethnography, grounded theory) or data collection methods (e.g., interview, focus group) is recommended.                                                                                                                                              | page 1      |
| <b>Abstract</b>                                    | Item 2. Abstract: Summary of key elements of the study using the abstract format of the intended publication; typically includes background, purpose, methods, results, and conclusions.                                                                                                                                                                                                             | page 2      |
| <b>Problem Formulation</b>                         | Item 3. Problem Formulation: Description and significance of the problem/phenomenon studied; review of relevant theory and empirical work; problem statement.                                                                                                                                                                                                                                        | page 4      |
| <b>Purpose or research question</b>                | Item 4. Purpose or research question: Purpose of the study and specific objectives or questions.                                                                                                                                                                                                                                                                                                     | page 4      |
|                                                    | Item 5. Qualitative approach and research paradigm: Qualitative approach (e.g., ethnography, grounded theory, case study, phenomenology, narrative research) and guiding theory if appropriate; identifying the research paradigm (e.g., post-positivist, constructivist/interpretivist) is also recommended; rationale                                                                              | page 4      |
|                                                    | Item 6. Researcher characteristics and reflexivity: Researchers' characteristics that may influence the research, including personal attributes, qualifications/experience, relationship with participants, assumptions, and/or presuppositions; potential or actual interaction between researchers' characteristics and the research questions, approach, methods, results and/or transferability. | page 16     |
| <b>Context</b>                                     | Item 7. Context: Setting/site and salient contextual factors; rationale.                                                                                                                                                                                                                                                                                                                             | page 4      |
| <b>Sampling strategy</b>                           | Item 8. Sampling strategy: How and why research participants, documents, or events were selected; criteria for deciding when no further sampling was necessary (e.g., sampling saturation); rationale.                                                                                                                                                                                               | page 4      |
| <b>Ethical issues pertaining to human subjects</b> | Item 9. Ethical issues pertaining to human subjects: Documentation of approval by an appropriate ethics review board and participant consent, or explanation for lack thereof; other confidentiality and data security issues.                                                                                                                                                                       | page 18     |

|                                                     |                                                                                                                                                                                                                                                                                                                                                                                                               |                 |
|-----------------------------------------------------|---------------------------------------------------------------------------------------------------------------------------------------------------------------------------------------------------------------------------------------------------------------------------------------------------------------------------------------------------------------------------------------------------------------|-----------------|
|                                                     | Item 10. Data collection methods: Types of data collected; details of data collection procedures including (as appropriate) start and stop dates of data collection and analysis, iterative process, triangulation of sources/methods, and modification of procedures in response to evolving study findings; rationale.                                                                                      | page 4          |
| <b>Data collection instruments and technologies</b> | Item 11. Data collection instruments and technologies: Description of instruments (e.g., interview guides, questionnaires) and devices (e.g., audio recorders) used for data collection; if/how the instrument(s) changed over the course of the study.                                                                                                                                                       | page 4          |
| <b>Units of study</b>                               | Item 12. Units of study: Number and relevant characteristics of participants, documents, or events included in the study; level of participation.                                                                                                                                                                                                                                                             | page 5          |
| <b>Data processing</b>                              | Item 13. Data processing: Methods for processing data prior to and during analysis, including transcription, data entry, data management and security, verification of data integrity, data coding and anonymization / de-identification of excerpts.                                                                                                                                                         | pages 4 & 5     |
| <b>Data analysis</b>                                | Item 14. Data analysis: Process by which inferences, themes, etc. were identified and developed, including the researchers involved in data analysis; usually references a specific paradigm or approach; rationale.                                                                                                                                                                                          | pages 4 & 5     |
| <b>Techniques to enhance trustworthiness</b>        | Item 15. Techniques to enhance trustworthiness: Techniques to enhance trustworthiness and credibility of data analysis,(e.g., member checking, triangulation, audit trail); rationale                                                                                                                                                                                                                         | page 4          |
| <b>Synthesis and interpretation</b>                 | Item 16. Synthesis and interpretation: Main findings (e.g., interpretations, inferences, and themes); might include development of a theory or model, or integration with prior research or theory.                                                                                                                                                                                                           | pages 5 - 17    |
| <b>Links to empirical data</b>                      | Item 17. Links to empirical data: Evidence (e.g., quotes, field notes, text excerpts, photographs) to substantiate analytic findings.                                                                                                                                                                                                                                                                         | pages 7,9,11,13 |
|                                                     | Item 18. Integration with prior work, implications, transferability, and contribution(s) to the field: Short summary of main findings, explanation of how findings and conclusions connect to, support, elaborate on, or challenge conclusions of earlier scholarship; discussion of scope of application/generalizability; identification of unique contribution(s) to scholarship in a discipline or field. | page 17         |
| <b>Limitations</b>                                  | Item 19. Limitations: Trustworthiness and limitations of findings                                                                                                                                                                                                                                                                                                                                             | pages 16 & 17   |

|                              |                                                                                                                                                 |         |
|------------------------------|-------------------------------------------------------------------------------------------------------------------------------------------------|---------|
| <b>Conflicts of interest</b> | Item 20. Conflicts of interest: Potential sources of influence or perceived influence on study conduct and conclusions; how these were managed. | page 18 |
| <b>Funding</b>               | Item 21. Funding: Sources of funding and other support; role of funders in data collection, interpretation, and reporting.                      | page 18 |

For peer review only

1  
2  
3  
4  
5  
6  
7  
8  
9  
10  
11  
12  
13  
14  
15  
16  
17  
18  
19  
20  
21  
22  
23  
24  
25  
26  
27  
28  
29  
30  
31  
32  
33  
34  
35  
36  
37  
38  
39  
40  
41  
42  
43  
44  
45  
46  
47  
48  
49  
50  
51  
52  
53  
54  
55  
56  
57  
58  
59  
60

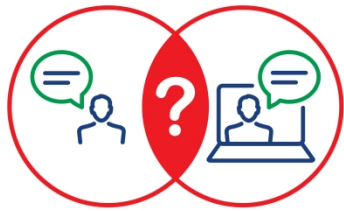

**NHS** **LONDON** **NIHR** **UNIVERSITY OF**  
Royal National Orthopaedic Hospital **NIHR** National Institute for Health Research **Southampton**

# Questions to help you decide if either a virtual or face-to-face appointment is best for you

Does my problem require me to be seen in person?

Would having a virtual appointment make things easier for me?

Can the treatment I need be delivered virtually?

How does this affect me?

[@awgilbert11](https://twitter.com/awgilbert11), [@connectphd](https://twitter.com/connectphd)

For more information about the research please visit [www.theconnectproject.info](http://www.theconnectproject.info)

297x209mm (300 x 300 DPI)



1  
2  
3  
4  
5  
6  
7  
8  
9  
10  
11  
12  
13  
14  
15  
16  
17  
18  
19  
20  
21  
22  
23  
24  
25  
26  
27  
28  
29  
30  
31  
32  
33  
34  
35  
36  
37  
38  
39  
40  
41  
42  
43  
44  
45  
46  
47  
48  
49  
50  
51  
52  
53  
54  
55  
56  
57  
58  
59  
60

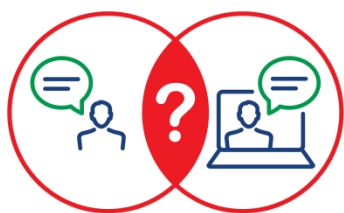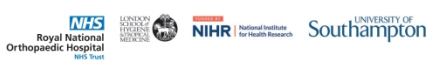

# Questions to help you decide if either a virtual or face-to-face appointment is best for you

Could my previous treatment have been managed successfully virtually?

Am I comfortable seeing myself on a screen?

What do I need from the clinic to support me with either virtual or face-to-face care?

How would a virtual appointment affect me?

How can my problem be managed best?

**What do I expect?**

[@awgilbert11](https://twitter.com/awgilbert11), [@connectphd](https://twitter.com/connectphd)

For more information about the research please visit [www.theconnectproject.info](http://www.theconnectproject.info)

297x209mm (300 x 300 DPI)

1  
2  
3  
4  
5  
6  
7  
8  
9  
10  
11  
12  
13  
14  
15  
16  
17  
18  
19  
20  
21  
22  
23  
24  
25  
26  
27  
28  
29  
30  
31  
32  
33  
34  
35  
36  
37  
38  
39  
40  
41  
42  
43  
44  
45  
46  
47  
48  
49  
50  
51  
52  
53  
54  
55  
56  
57  
58  
59  
60

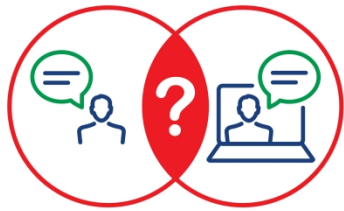

# Questions to help you decide if either a virtual or face-to-face appointment is best for you

     
Royal National Orthopaedic Hospital NHS Trust    NIHR National Institute for Health Research    UNIVERSITY OF Southampton

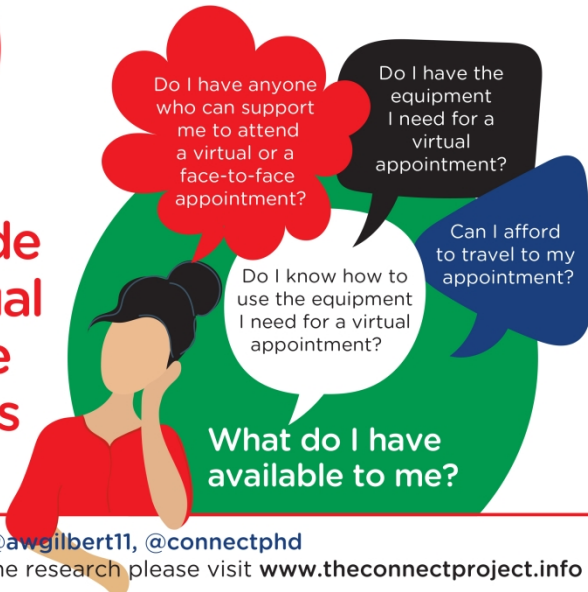

 @awgilbert11, @connectphd

For more information about the research please visit [www.theconnectproject.info](http://www.theconnectproject.info)

297x209mm (300 x 300 DPI)

1  
2  
3  
4  
5  
6  
7  
8  
9  
10  
11  
12  
13  
14  
15  
16  
17  
18  
19  
20  
21  
22  
23  
24  
25  
26  
27  
28  
29  
30  
31  
32  
33  
34  
35  
36  
37  
38  
39  
40  
41  
42  
43  
44  
45  
46  
47  
48  
49  
50  
51  
52  
53  
54  
55  
56  
57  
58  
59  
60

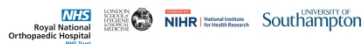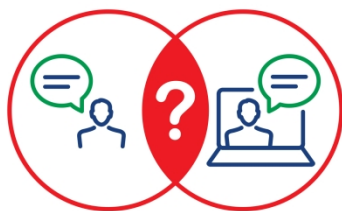

# Questions to help you decide if either a virtual or face-to-face appointment is best for you

What do I need to do if I choose a virtual or face-to-face appointment?

What other things in my life do I need to consider?

Can I do my rehabilitation virtually?

What do I need to do now?

[@awgilbert11](https://twitter.com/awgilbert11), [@connectphd](https://twitter.com/connectphd)

For more information about the research please visit [www.theconnectproject.info](http://www.theconnectproject.info)

297x209mm (300 x 300 DPI)
