# Supplementary material for: Factors that influence patient preferences for virtual consultations in an orthopaedic rehabilitation setting: a qualitative study
Source: PubMed Central journal article supplement (PMC7908916; doi:10.1136/bmjopen-2020-041038), 2021-02-25
Supplement: bmjopen-2020-041038supp004.pdf [file bmjopen-2020-041038supp004.pdf]

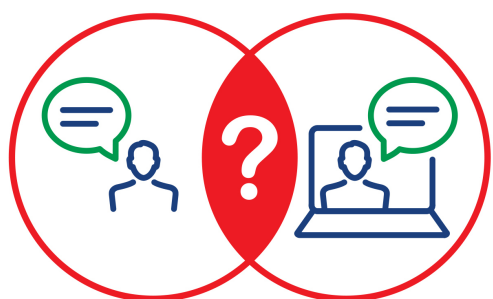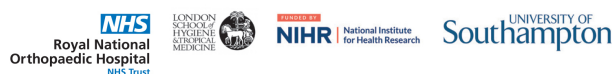

# Questions to help you decide if either a virtual or face-to-face appointment is best for you

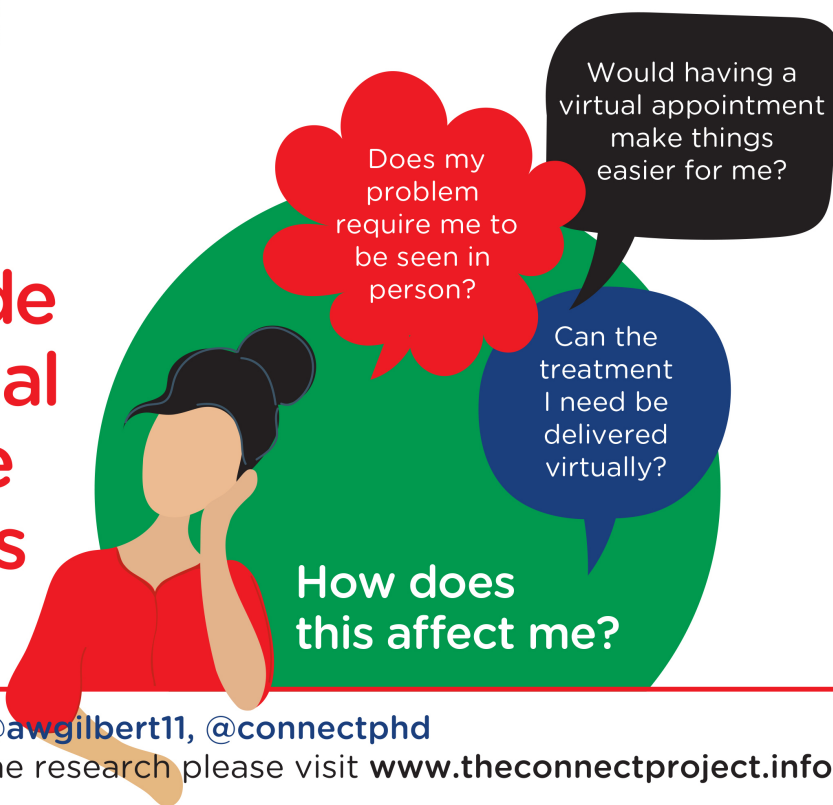

 @awgilbert11, @connectphd

For more information about the research please visit [www.theconnectproject.info](http://www.theconnectproject.info)
