# Supplementary material for: Factors that influence patient preferences for virtual consultations in an orthopaedic rehabilitation setting: a qualitative study
Source: PubMed Central journal article supplement (PMC7908916; doi:10.1136/bmjopen-2020-041038), 2021-02-25
Supplement: bmjopen-2020-041038supp005.pdf [file bmjopen-2020-041038supp005.pdf]

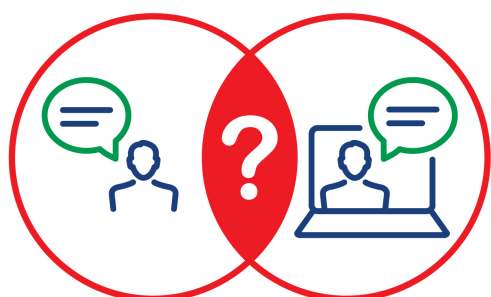

## Questions to help you decide if either a virtual or face-to-face appointment is best for you

**NHS**  
Royal National  
Orthopaedic Hospital  
NHS Trust

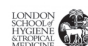

**NIHR** National Institute  
for Health Research

UNIVERSITY OF  
**Southampton**

Could my previous treatment have been managed successfully virtually?

Am I comfortable seeing myself on a screen?

What do I need from the clinic to support me with either virtual or face-to-face care?

How would a virtual appointment affect me?

How can my problem be managed best?

What do I expect?

 [@awgilbert11](https://twitter.com/awgilbert11), [@connectphd](https://twitter.com/connectphd)

For more information about the research please visit [www.theconnectproject.info](http://www.theconnectproject.info)
